# Supplementary material for: The prevalence of latex sensitisation and allergy and associated risk factors among healthcare workers using hypoallergenic latex gloves at King Edward VIII Hospital, KwaZulu-Natal South Africa: a cross-sectional study
Source: PubMed Central journal article supplement — BMJ Open. 2013 Dec 7;3(12):e002900. doi: 10.1136/bmjopen-2013-002900 (PMC3863123; doi:10.1136/bmjopen-2013-002900), 2013-12-07
Supplement: bmjopen-2013-002900.draft_revisions.pdf [file bmjopen-2013-002900.draft_revisions.pdf]

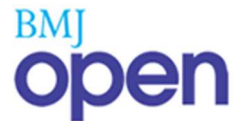

**The prevalence of latex sensitisation and allergy and associated risk factors amongst health care workers using hypoallergenic latex gloves at King Edward VIII hospital, KwaZulu-Natal South Africa: A cross sectional study**

|                                 |                                                                                                                                                                               |
|---------------------------------|-------------------------------------------------------------------------------------------------------------------------------------------------------------------------------|
| Journal:                        | <i>BMJ Open</i>                                                                                                                                                               |
| Manuscript ID:                  | bmjopen-2013-002900                                                                                                                                                           |
| Article Type:                   | Research                                                                                                                                                                      |
| Date Submitted by the Author:   | 18-Mar-2013                                                                                                                                                                   |
| Complete List of Authors:       | Phaswana, Shumani; University of KwaZulu Natal, Occupational and Environmental Health<br>Naidoo, Saloshni; University of KwaZulu Natal, Occupational and Environmental Health |
| <b>Primary Subject Heading</b>: | Occupational and environmental medicine                                                                                                                                       |
| Secondary Subject Heading:      | Immunology (including allergy), Occupational and environmental medicine, Epidemiology                                                                                         |
| Keywords:                       | Latex, Hypoallergenic, Healthcare workers, South Africa                                                                                                                       |
|                                 |                                                                                                                                                                               |

SCHOLARONE™  
Manuscripts

1  
2  
3 1 **The prevalence of latex sensitisation and allergy and associated risk factors among healthcare**  
4 **workers using hypoallergenic latex gloves at King Edward VIII Hospital, KwaZulu-Natal South**  
5 **Africa: A cross sectional study**  
6  
7  
8

9  
10 4  
11 5 S M Phaswana<sup>1</sup>, S Naidoo<sup>1</sup>

12  
13 6 <sup>1</sup>Discipline of Occupational and Environmental Health, School of Nursing and Public Health,  
14 7 University of kwaZulu Natal, South Africa  
15

16 8  
17  
18 9 Contact Details for Corresponding Author  
19

20 10 Dr Shumani Makwarela Phaswana  
21

22 11 306 Valhaven  
23

24 12 80 Cromwell Road  
25

26 13 Glenwood  
27

28 14 Durban  
29

30 15 4001  
31

32 16 E-mail: [shuma8008@yahoo.com](mailto:shuma8008@yahoo.com)  
33

34 17 Tel nr: 031 260 4507  
35

36 18 Fax nr: 031 260 4663  
37

38 19  
39  
40 20 Keywords: Latex, hypoallergenic, healthcare workers, South Africa  
41

42 21 Word Count:  
43

44 22 Abstract: 299  
45

46 23 Body: 4,359  
47

48 24  
49  
50  
51

52 25  
53  
54

55 26  
56  
57  
58  
59  
60

27

**ARTICLE SUMMARY****ARTICLE FOCUS**

- The use of hypoallergenic latex gloves has been adopted as policy in different healthcare settings globally.
- However, information with regard to their use and the development of latex sensitisation and allergy among exposed healthcare workers is limited.
- We hypothesised that there is latex sensitization and allergy in healthcare workers using hypoallergenic latex gloves in a South African hospital.

**KEY MESSAGE**

- In the presence of powder free hypoallergenic gloves, latex sensitisation and latex allergy is still an important occupational health effect in healthcare workers.
- Healthcare workers should be continuously monitored for the development of latex sensitisation and allergy.
- There is a need for a national policy accompanied by clear implementation plans as well as sustainable education and training programmes to address latex sensitisation and allergy among HCWs.

**STRENGTH AND LIMITATIONS**

- Strength of the study included the presence of a control group providing a background prevalence of latex sensitisation in this population and random selection of participants which minimised the potential of participant bias that arises with a volunteer approach.
- This study was limited by the cross sectional study design as it only allowed for the determination of the prevalence of latex sensitisation; recall bias with regard to the number of gloves used in the past 7 working days and the self-reporting of personal and family atopic disorders may have resulted in the misclassification of exposure and atopy respectively.

28

29

30

2

1  
2  
3 31  
4  
5  
6 32  
7  
8  
9 33  
10  
11  
12 34 **What this paper adds**  
13  
14 35  In the presence of powder free hypoallergenic gloves, latex sensitisation and latex allergy is still an  
15 36 important occupational health effects in healthcare workers  
16  
17  
18 37  Healthcare workers should be continuously monitored for the development of latex sensitisation and  
19 38 allergy  
20  
21  
22 39  There is a need for a national policy accompanied by clear implementation plans as well as sustainable  
23 40 education and training programmes to address latex sensitisation and allergy among HCWs  
24  
25  
26  
27 41  
28  
29  
30 42 **ABSTRACT**  
31  
32  
33 43 **Objectives**  
34  
35 44 The present study describes latex sensitisation and allergy prevalences and associated factors among  
36 45 healthcare workers using hypoallergenic latex gloves at King Edward VIII Hospital in KwaZulu-Natal  
37  
38  
39 46 South Africa.  
40  
41  
42  
43 47 **Design**  
44  
45 48 Cross sectional study  
46  
47  
48  
49 49 **Setting**  
50  
51 50 A tertiary hospital in eThekweni municipality, KwaZulu Natal, South Africa  
52  
53  
54  
55 51 **Participants**  
56  
57  
58  
59  
60

1  
2  
3 52 600 healthcare workers were randomly selected and 501(337 exposed and 164 unexposed) participated.  
4  
5 53 Participants who were pregnant, less than one year of work as healthcare worker and history of  
6  
7 54 anaphylactic reaction were excluded from the study.  
8  
9

### 10 55 **Primary and secondary outcome measures**

11  
12  
13 56 Latex sensitisation and latex allergy were the outcome of interest and they were successfully measured  
14  
15

### 16 57 **Results**

17  
18  
19 58 Prevalence of latex sensitisation and allergy was observed among exposed workers (7.1% and 5.9%) and  
20  
21 59 unexposed workers (3.1% and 1.8%). Work related allergy symptoms were significantly higher in  
22  
23 60 exposed workers (40.9%,  $p < 0.05$ ). Duration of employment was inversely associated with latex allergy  
24  
25 61 (OR: 0.9; 95% CI: 0.8-0.9). The risk of latex sensitisation (OR: 4.2; 95% CI: 1.2-14.1) and allergy (OR:  
26  
27 62 5.1; 95% CI: 1.2-21.2) increased with exclusive use of powder-free latex gloves. A dose –response  
28  
29 63 relationship was observed for powdered latex gloves (OR: 1.1; 95% CI: 1.0-1.2). Atopy (OR: 1.5; 95%  
30  
31 64 CI: 0.7-3.3 and OR: 1.4; 95% CI: 0.6-3.2) and fruit allergy (OR: 2.3; 95% CI: 0.8-6.7 and OR: 3.1; 95%  
32  
33 65 CI: 1.1-9.2) also increased the risk of latex sensitisation and allergy.  
34  
35  
36  
37

### 38 66 **Conclusion**

39  
40  
41 67 This study adds to previous findings that healthcare workers exposed to hypoallergenic latex gloves are at  
42  
43 68 risk for developing latex sensitisation highlighting its importance as an occupational hazard in healthcare.  
44  
45 69 More research is needed to identify the most cost effective way of implementing a latex free environment  
46  
47 70 in resource limited countries, such as South Africa. In addition more cohort analysis is required to better  
48  
49 71 understand the chronicity of illness and disability associated with latex allergy.  
50  
51  
52

53 72  
54  
55  
56  
57  
58  
59  
60

## 73 INTRODUCTION

74 Latex allergy (LA) as an occupational disease among healthcare workers (HCWs) gained  
75 recognition after Nutter published a case report of contact urticaria in a HCW in 1979.<sup>1</sup> The  
76 increase in prevalence coincided with the emergence of the Human Immunodeficiency Virus/  
77 Acquired immunodeficiency syndrome (HIV/AIDS) epidemic and the introduction of “universal  
78 precautions” in the healthcare industry which had resulted in the increased use of latex gloves  
79 among HCWs.<sup>2</sup>

80 Latex gloves are preferred due to their superior barrier and physical properties as compared to  
81 the non-latex gloves.<sup>3</sup> International epidemiological studies have reported the prevalence of latex  
82 allergy among HCWs to range between 2-22% depending on the population and diagnostic  
83 methods used.<sup>4-11</sup> The prevalence in the general population has been reported to range between  
84 1-6%.<sup>12 13</sup>

85 In South Africa studies amongst HCWs reported a latex sensitisation prevalence of between 2.7  
86 to 20.8%.<sup>14-16</sup> Latex allergy in HCWs is a compensable disease in South Africa in terms of the  
87 Compensation of Occupational Injuries and Diseases Act No. 130 of 1993.<sup>17</sup> Latex allergy  
88 comprised an estimated 1.4 % of all occupational diseases reported by the Surveillance of Work  
89 Related and Occupational Respiratory Diseases of South Africa programme (SORDSA) between  
90 1996 and 1998.<sup>18</sup> In 2000 De Beers and De Villiers documented a high prevalence (20.8%) of  
91 latex sensitisation among theatre and laboratory staff (n=277) employed at Tygerberg hospital in  
92 the Western Cape Province.<sup>15</sup> Potter and colleagues conducted a latex allergy screening survey  
93 among Groote Schuur hospital employees. They reported latex sensitisation of 11.9% among 969  
94 respondents with the majority of sensitised HCWs being nursing staff (64%) followed by doctors  
95 (10%), technologists (8%), paramedics (7%) and cleaners (6%).<sup>16</sup> A 2001 survey at the Red

1  
2  
3 96 Cross childrens hospital in Cape Town reported a latex sensitisation prevalence of 7% amongst  
4  
5 97 the HCWs working in clinical and laboratory areas of the hospital.<sup>14</sup>  
6  
7  
8  
9 98 Powdered latex gloves were identified as an important risk factor for latex sensitisation and  
10  
11 99 allergy in HCWs as they were found to contain a high allergenic protein content.<sup>19</sup> Following  
12  
13 100 these findings, hypoallergenic gloves with low allergen content namely, low powdered and  
14  
15 101 powder free latex gloves were introduced. The European definition of powder free gloves is  
16  
17 102 gloves with powder content not exceeding 2 mg per glove and leachable latex protein which is as  
18  
19 103 low as is reasonably practical.<sup>20</sup>  
20  
21  
22  
23  
24 104 Hypoallergenic gloves have been associated with reduced latex aeroallergen concentrations,  
25  
26 105 reduced conversion rates and a subsequent decrease in clinic visits, and compensation claims for  
27  
28 106 latex induced occupational asthma and allergic contact dermatitis among HCWs.<sup>19,21</sup> As much as  
29  
30 107 the use of low or powder free gloves has been shown to reduce latex related symptoms, other  
31  
32 108 studies have shown that exposed HCWs still exhibit symptoms at very low levels of measureable  
33  
34 109 airborne latex allergens.<sup>22</sup> Most studies have reported on the airborne levels and inhalational  
35  
36 110 route of exposure hence the recommendation on low powdered or powder free latex gloves.  
37  
38 111 There is little consideration given to the dermal route of exposure despite the fact that exposure  
39  
40 112 is as a result of direct contact in these instances.<sup>23</sup> Eliminating the cornstarch powder only  
41  
42 113 removed the carrier and not the source of allergen which is in the latex itself. Therefore workers  
43  
44 114 using powder free gloves are still exposed to the allergenic content of latex gloves. It has been  
45  
46 115 shown that different brands from different suppliers contain differing levels of protein due to a  
47  
48 116 lack of standards in latex glove manufacture.<sup>24</sup> A South African study reported that some powder  
49  
50 117 free latex gloves were found to have high allergenic protein content.<sup>24</sup> HCWs using these gloves  
51  
52  
53  
54  
55  
56  
57  
58  
59  
60

1  
2  
3 118 are exposed via direct dermal contact and are at risk for developing latex sensitisation and if  
4  
5  
6 119 exposure continues they can later develop latex allergy.  
7

8  
9 120 In South Africa the health and safety of workers is regulated by the Occupational Health and  
10  
11 121 Safety Act No 85 of 1993 (OHSA).<sup>25</sup> The accompanying Hazardous Chemical Substances  
12  
13 122 Regulations No?? (HCS) of OHSA has tasked the employer with ensuring health and safety in  
14  
15  
16 123 the workplace by applying the hierarchy of hygiene controls in addressing workplace hazardous  
17  
18 124 chemicals.<sup>25</sup> In South African hospitals the procurement of latex gloves is based on the cost of  
19  
20  
21 125 gloves and the stock is obtained from various providers who meet the South African Bureau of  
22  
23 126 Standards (SABS) specifications for latex gloves.  
24

25  
26  
27 127 While it is important to diagnose and manage an individual worker with latex allergy, complete  
28  
29 128 control of hazardous substance in the workplace is equally important. While a latex free work  
30  
31 129 environment would be a preferred control strategy, substitution of powdered latex gloves with  
32  
33 130 powder free gloves was shown to be cost effective and associated with improved clinical  
34  
35  
36 131 outcome.<sup>21</sup> As a result this was adopted as the most reasonable and practical approach in  
37  
38 132 addressing the problem of latex allergy among HCWs both internationally and to some extent  
39  
40  
41 133 nationally.<sup>26-28</sup> This has proven to reduce latex induced clinical outcomes. Even with this  
42  
43 134 intervention, studies in Western countries such as Germany and the UK have shown that the risk  
44  
45  
46 135 of latex sensitisation still exists and more needs to be done to protect HCWs.<sup>29, 30</sup>  
47

48  
49 136 The current study described the prevalence of latex sensitisation and allergy among healthcare  
50  
51 137 workers who use hypoallergenic powder free and lightly powdered latex gloves.  
52  
53  
54  
55  
56  
57  
58  
59  
60



1  
2  
3 138 **METHODS**  
4  
5  
6

7 139 **Study design and population**  
8  
9

10 140 This was a cross sectional study conducted between July 2011 and January 2012. The study  
11  
12 141 location was King Edward VIII hospital, the second largest hospital in the Southern hemisphere,  
13  
14 142 providing regional and tertiary services to the whole of KwaZulu-Natal (KZN) and the Eastern  
15  
16 143 Cape Province in South Africa. It has a bed status of 1300 and has a workforce of 2400. The  
17  
18 144 hospital was chosen due to the large workforce with different departments, and the policy of  
19  
20 145 using both powder free and low powdered latex gloves for approximately 10 years.  
21  
22  
23  
24

25 146 The study population was limited to HCWs currently employed at King Edward VIII Hospital  
26  
27 147 for more than 12 months. HCWs were defined as all personnel employed in the hospital.  
28  
29  
30

31 148 The prevalence of latex sensitization in HCWs using powdered latex gloves in the Western Cape  
32  
33 149 Province was 11.9% in 2001.<sup>16</sup> We expected the prevalence at King Edward VIII hospital to be  
34  
35 150 less than the 11.9% observed in the Western Cape Province due to the adoption of a  
36  
37 151 hypoallergenic latex glove policy. Using EPI Info calculator version 3.04.04., it was assumed  
38  
39 152 that 50% of sensitised workers have remained sensitive despite the introduction of  
40  
41 153 hypoallergenic latex gloves 10 years prior. Using an expected latex sensitization prevalence of  
42  
43 154 6% for the exposed group and the prevalence among the general population being reported as  
44  
45 155 less than 1% the required sample size was calculated to be 585 participants 2 exposed  
46  
47 156 participants for every 1 non-exposed participant (exposed =390; unexposed =195). HCWs were  
48  
49 157 considered to be exposed if they were likely to use gloves. Unexposed HCWs were drawn from  
50  
51 158 the administrative staff of the hospital.  
52  
53  
54  
55  
56  
57  
58  
59  
60

1  
2  
3 159 **Questionnaire**  
4  
5

6  
7 160 We used an adaptation of the questionnaire used in an epidemiological study conducted at  
8  
9 161 Groote Schuur in 2001<sup>16</sup> with permission from Professor Paul Potter, Allergology Unit, Medical  
10  
11 162 School, University of Cape Town. The questionnaire containing open and closed ended questions  
12  
13  
14 163 was adapted to include items on exposure assessment. The questionnaire was administered by a  
15  
16 164 trained research assistant (Honours degree in medical science) immediately prior to the skin  
17  
18 165 prick test. The questionnaire collected data on the participants' demographics, personal risk  
19  
20  
21 166 factors, latex exposure assessment, clinical manifestations of latex sensitization (dermal and  
22  
23 167 respiratory) and history of previous reactions suggestive of latex allergy.  
24  
25

26  
27 168 **Exposure Assessment**  
28  
29

30 169 *Individual Exposure*  
31  
32

33 170 Individual latex exposure was determined by the type of gloves used, number of gloves used per  
34  
35  
36 171 day, and duration of glove use. The information was limited to 7 working shifts/days prior to the  
37  
38 172 interview.  
39  
40

41 173 *Departmental Exposure*  
42  
43  
44

45 174 Departmental exposure was defined as glove usage in the past 12 months (01 January 2011-31  
46  
47 175 December 2011). The overall departmental exposure was obtained by reviewing monthly glove  
48  
49  
50 176 usage by each department from the stock room register. This was used to estimate the annual  
51  
52 177 exposure for employees who had rotated through different departments in the past 12 months.  
53  
54 178 Non sterile latex gloves are distributed throughout the clinical departments while a high  
55  
56  
57 179 proportion of sterile gloves are distributed to labour ward, theatre, surgical wards and outpatient  
58  
59  
60

1  
2  
3 180 departments. Glove type was defined as powdered and powder-free and latex free based on the  
4  
5 181 previous literature.<sup>24, 32</sup>  
6  
7

### 8 9 182 **Skin prick test (SPT)**

10  
11  
12 183 The SPT was conducted using the Stallergenes kit.<sup>32</sup> It was performed in a room with access to  
13  
14 184 emergency resuscitation services by a trained research assistant. The research assistant and  
15  
16  
17 185 principal investigator were trained by the Chief Pulmonary Technician at Inkosi Albert Luthuli  
18  
19 186 Central hospital (A Quaternary Hospital in KwaZulu-Natal) on 2 separate occasions. The test  
20  
21 187 was performed on the inner aspect of the participants' forearms, between the wrist and the elbow  
22  
23 188 on normal skin. A positive and negative control were performed using histamine and buffered  
24  
25 189 normal saline solution respectively on the same arm and they were 3 cm apart to prevent cross  
26  
27 190 contamination. The protein concentration of the latex extract was 500µg/ml and the solution was  
28  
29 191 applied as it was with no further dilutions. After 15-20 minutes subsequent to puncturing the  
30  
31 192 skin, the SPT reaction wheal and flare was outlined by a black ink and clear tape was used to  
32  
33 193 transfer the outline from skin to the results sheet by the trained research assistant or principal  
34  
35 194 investigator.<sup>33</sup> A positive result was indicated by a mean wheal diameter measuring 3 mm or  
36  
37 195 greater than the negative control. Results were recorded on a standardized result sheet. The  
38  
39 196 research assistant's test performance was audited by the principal investigator at regular intervals  
40  
41 197 to ensure correctness of technique and interpretation of the results.  
42  
43  
44  
45  
46  
47  
48

49 198 Informed signed consent was obtained from all the participants prior to participation. They had  
50  
51 199 the option of participating in the questionnaire interview and the SPT or refusing the SPT. The  
52  
53 200 study protocol was approved by the Biomedical Research Ethics Committee of the University of  
54  
55  
56  
57  
58  
59  
60

1  
2  
3 201 KwaZulu-Natal (BE048/11). Permission to conduct the study was also obtained from the KZN  
4  
5 202 Provincial Department of Health and King Edward VIII hospital management.  
6  
7  
8

9 **203 Statistical analysis**

10  
11  
12 204 Data was captured in Excel and analysed in Stata Version 11. Frequencies and medians with  
13  
14 205 ranges were presented for categorical and continuous variables respectively. The Chi-square and  
15  
16  
17 206 the Kruskal-Wallis test was used to test for significant associations between categorical an  
18  
19 207 continuous variables and the dependent variables under study on bivariate analysis respectively.  
20  
21  
22  
23 208 Binary logistic regression was used to test for significant associations between independent and  
24  
25 209 dependent variables on multivariate analysis. The dependent variables used in the regression  
26  
27  
28 210 analysis were: Latex sensitisation, which was defined as having a SPT wheal of  $\geq 3$ mm to latex  
29  
30 211 extract; Latex allergy (LA) was defined as being SPT positive and a report of having any one or  
31  
32 212 more of the listed work related clinical symptoms namely itchy eyes, red eyes, runny eyes, runny  
33  
34  
35 213 nose, itchy nose, sneezing, coughing, tight chest, wheezing, itchy skin, skin rash or dizziness.  
36  
37 214 Independent variables that were considered for analysis were as follows: Age (yrs) and sex,  
38  
39 215 duration of employment, job title, current department employed in, type of gloves used, number  
40  
41 216 of pairs of gloves used per day, self reported and family history of atopy, food allergy and  
42  
43  
44 217 previous history of open surgery and number of surgical procedures. In the multivariate analysis,  
45  
46 218 age was omitted due to collinearity with duration of employment. Departmental glove  
47  
48  
49 219 consumption was omitted and number of pair of gloves was used as an indicator of individual  
50  
51 220 latex glove exposure. The variable number of pairs of gloves used and duration of employment  
52  
53  
54 221 were retained as continuous variables in the multivariate model.  
55  
56  
57  
58  
59  
60

## 222 RESULTS

### 223 Participant Demographics

224 Sixty five HCWs refused to participate in the study. Among the 520 HCWs who responded to  
225 the invitation there was an overall participation rate of 85.5 % (n=501) with 3.6% (n=19)  
226 refusing SPT. There was no significant difference between those refusing SPT and those who  
227 had the SPT with respect to latex exposure status, age, sex and duration of employment.

228 The median age of participants was 42.2 years (range: 22 years-65 years) with the greater  
229 proportion of them being females. The median duration of employment was 10.9 years (range: 1  
230 year-42 years) with the majority of exposed participants having worked as a HCW for < 10  
231 years. Most unexposed healthcare workers had been employed for > 20 years . Personal and  
232 family history of allergy were more prevalent among unexposed HCWs while exposed HCWS  
233 reported a higher prevalence of a fruit allergy and history of previous surgery (Table 1).

### 234 Prevalence of Latex Sensitisation and Allergy

235 The overall prevalence of latex sensitisation and latex allergy were 5.9% (n=29) and 4.6%  
236 (n=23) respectively. Although the difference was not significant, the prevalence of latex  
237 sensitisation was higher among the exposed group (7.1%) as compared to the unexposed group  
238 (3.1%). Latex allergy was significantly higher in the exposed group than unexposed group (5.9%  
239 vs 1.8%, p=0.04). There was a significant difference in the work related allergy symptoms  
240 between exposed and unexposed workers (40.9% vs. 31.7%, p=0.04) (Table 1). Symptoms that  
241 were significantly associated with latex sensitisation were skin rash (p< 0.000), itchy skin  
242 (p=0.001), runny nose (p=0.004), red eyes (p=0.01) and itchy eyes (p=0.01).

1  
2  
3 243 The prevalence of latex sensitization was higher among those who were exposed and those with  
4  
5 244 employment duration of < 10yrs. Although the prevalence of latex sensitisation was lower  
6  
7  
8 245 among participants < 30 years of age, there was no significant variation with age or sex. There  
9  
10 246 was a significant difference (p=0.04) in the prevalence of fruit allergy between those participants  
11  
12 247 with latex sensitisation (17.2%) and unsensitised participants (6.9%) The exclusive use of  
13  
14 248 powder free latex gloves was found to be significantly (p=0.003) higher among the participants  
15  
16 249 who had latex sensitisation. There was equal distribution of powdered and powder free latex  
17  
18 250 gloves among those who reported the use of mixed gloves. The prevalence of reporting previous  
19  
20 251 open surgery and use of other non- occupational exposure latex containing material did not vary  
21  
22 252 significantly between those who had latex sensitisation and those who were unsensitised. There  
23  
24 253 was a significantly higher prevalence of reporting allergic reactions when handling other latex  
25  
26 254 containing medical equipment among participants with latex allergy as compared to unsensitised  
27  
28 255 participants (10.3% vs 1.7%, p=0.002) (Table 2).  
29  
30  
31  
32  
33  
34

35 256 **Crude association of demographics, exposure status, medical and personal history and latex**  
36  
37 257 **sensitisation, latex allergy**  
38  
39  
40

41 258 Latex exposure was significantly associated with latex allergy (OR: 3.4; 95% CI: 1.1-10.8).  
42  
43 259 Working as a HCW for 5-9 yrs was significantly associated with latex sensitisation (OR: 2.6;  
44  
45 260 95% CI: 1.2-5.5) and latex allergy (OR: 3.3; 95% CI: 1.4-7.6), respectively. Employment  
46  
47 261 duration as a HCW for >20 years was protective against latex allergy (OR: 0.2; 95% CI: 0.0-0.8).  
48  
49 262 Working as an enrolled nurse was significantly associated with both latex sensitisation (OR: 2.5;  
50  
51 263 95% CI: 1.2-5.3) and latex allergy (OR: 2.4; 95% CI: 1.1-5.6). The exclusive use of powder free  
52  
53 264 latex gloves was significantly associated with latex sensitisation (OR: 3.1; 95% CI: 1.4-6.8) and  
54  
55 265 latex allergy (OR: 3.1; 95% CI: 1.7-9.1). Powdered and powder free latex gloves were equally  
56  
57  
58  
59  
60

1  
2  
3 266 distributed among those who reported the use of mixed gloves. The annual consumption of pairs  
4  
5  
6 267 of gloves per HCW by department was ranked and grouped into tertiles. Although medical and  
7  
8 268 surgical wards had low and moderate pairs of gloves consumption per HCW, these wards had the  
9  
10 269 highest proportion of workers with latex sensitisation (n=6, 20.0% each). However the relation  
11  
12 270 was only significant for those who reported the medical ward as being the current department in  
13  
14 271 which they worked (p=0.01). The proportions for powdered latex glove use were 71% and 69%  
15  
16 272 in medical and surgical wards, respectively and this was not statistically significant. Exposure to  
17  
18 273 other latex containing medical devices was not significantly different from what was reported in  
19  
20 274 other wards. There was no significant association between personal history, latex sensitisation  
21  
22 275 and latex allergy. Fruit allergy was significantly associated with latex allergy (OR: 3.7; 95%:  
23  
24 276 1.4-10.4) (Table 3). Listed fruits were evaluated for their independent association with latex  
25  
26 277 sensitisation. Avocado (p=0.01) and others (p=0.003) which included pineapple and orange  
27  
28 278 showed significant associations with latex sensitisation (data not shown).  
29  
30  
31  
32  
33  
34

### 35 279 **Multivariate analysis**

36  
37  
38 280 While latex exposure had estimates above 2, there was no significant association with latex  
39  
40 281 sensitisation and latex allergy. Duration of employment was found to be inversely associated  
41  
42 282 with latex allergy in models I and II. The exclusive use of powder free latex gloves was  
43  
44 283 significantly associated with latex sensitisation (OR: 4.2; 95% CI: 1.2-14.1) and latex allergy  
45  
46 284 (OR: 5.1; 95%CI: 1.2-21.2) on multivariate analysis. This significant association disappeared  
47  
48 285 when examining the number of pairs of powder free gloves used in the last 7 days. A weak  
49  
50 286 association was observed for the number of pairs of powdered latex gloves used in the last 7 days  
51  
52  
53 287 with both latex sensitisation and latex allergy (model III and IV). There was a significant  
54  
55  
56  
57  
58  
59  
60



1  
2  
3 288 association between fruit allergy and latex allergy in model I (OR: 3.1: 95% CI: 1.1-9.2) (Table  
4  
5 289 4).  
6  
7  
8

9 **DISCUSSION**

10  
11 291 This is an important study for South African HCWs as it examined the risk of latex sensitisation  
12  
13 292 in a group of workers exposed to hypoallergenic latex gloves. As previously mentioned there has  
14  
15 293 been no literature documenting the prevalence of latex sensitisation among South African HCWs  
16  
17 294 using hypoallergenic lightly powdered or powder-free latex gloves. The prevalence of latex  
18  
19 295 sensitisation among exposed HCWs (7.1%) in this study is comparable to findings among HCWs  
20  
21 296 in another South African hospital.<sup>14</sup> However it was considerably lower than the 11.9%  
22  
23 297 prevalence reported by Potter in the same year.<sup>16</sup> While a substantial number of participants  
24  
25 298 (37%) reported work related allergy symptoms, only 4.6% met our definition of latex allergy.  
26  
27 299 The important symptoms associated with latex sensitisation were skin rash, itchy skin, runny  
28  
29 300 nose, red and itchy eyes in keeping with previous studies.<sup>4, 5</sup> Elimination of powdered latex  
30  
31 301 gloves has shown a reduction in the concentration of aeroallergens in the operating room with  
32  
33 302 the low prevalence of latex allergy in our study population.  
34  
35  
36  
37  
38  
39  
40

41 303 Although the relationship was weak, this study showed that the risk of latex sensitisation  
42  
43 304 decreases with duration of employment. The explanation of our finding may be that new  
44  
45 305 employees are only sensitised and have not yet manifested clinical symptoms and they continue  
46  
47 306 using latex gloves. On the other hand senior HCWs may have been sensitised during their earlier  
48  
49 307 years of employment and as a result they either moved to departments with less exposure to latex  
50  
51 308 gloves or deliberately avoid latex containing products and therefore exhibit less latex related  
52  
53 309 symptoms. Furthermore the introduction of hypoallergenic gloves 10 years prior to the study  
54  
55 310 may explain the reduced sensitisation in senior HCWs as demonstrated in the study by smith et al  
56  
57  
58  
59  
60



1  
2  
3 311 in 2007.<sup>21</sup> The published literature has been inconsistent in reporting the association between  
4  
5 312 duration of employment and latex sensitisation. Jones and co-workers observed a high  
6  
7 313 prevalence of latex sensitisation among junior dental students exposed to exclusive powder free  
8  
9 314 latex gloves compared to dental staff and senior students.<sup>34</sup> Among Singaporean HCWs no  
10  
11 315 significant difference was reported between duration of employment and latex sensitisation,<sup>35</sup>  
12  
13 316 while among Italian nurses latex sensitisation was associated with an increasing duration of  
14  
15 317 employment.<sup>36</sup>

16  
17  
18  
19  
20 318 In our study HCWs who exclusively used powdered free latex gloves had a 4 times greater odds  
21  
22 319 of developing latex sensitisation. A possible explanation for this is that those who are sensitised  
23  
24 320 and manifesting glove related symptoms preferentially used exclusive powder free latex gloves.  
25  
26 321 Moreover the background prevalence of latex sensitisation in this study was relatively higher  
27  
28 322 (3.5%) than previously reported prevalence in the general population by Bousquet et al.<sup>13</sup> Studies  
29  
30 323 have shown that some of these “hypoallergenic” latex gloves actually contain high levels of  
31  
32 324 allergens which can be release into the environment with aggressive manipulation.<sup>24</sup> Some of the  
33  
34 325 sensitised HCWs may have been sensitised before the hospital implemented a hypoallergenic  
35  
36 326 latex glove policy. Also Smith et al showed that complete avoidance of powdered latex glove can  
37  
38 327 result in the reduction or no change in measurable IgE antibodies .<sup>37</sup> A study in Germany  
39  
40 328 reported a high prevalence of 8% among 226 dental students who had only been exposed to  
41  
42 329 exclusive powder free latex gloves.<sup>29</sup> Similarly in the UK despite a total ban on powdered latex  
43  
44 330 gloves Clayton found a 10% prevalence of latex sensitisation in HCWs.<sup>30</sup> It is also not clear to  
45  
46 331 what extent the aeroallergens released by colleagues using powdered latex gloves influence this  
47  
48 332 finding. Furthermore the role of other latex containing medical devices during sensitisation  
49  
50 333 period cannot be entirely ruled out.  
51  
52  
53  
54  
55  
56  
57  
58  
59  
60

1  
2  
3 334 In our study, frequency of exposure as measured by the number of gloves used in the last 7  
4  
5  
6 335 working days showed a weak association between powdered latex gloves and latex sensitisation  
7  
8 336 but no association could be demonstrated with powder free latex gloves. Airborne latex  
9  
10  
11 337 aeroallergens have been shown to increase with the number of powdered gloves used which  
12  
13 338 subsequently increases the risk of latex sensitisation and clinical latex glove related allergy  
14  
15 339 symptoms.<sup>19</sup>

16  
17  
18  
19 340 The positive association between department with low glove consumption per HCW and latex  
20  
21 341 sensitisation is in contrast with previous finding by Liss and co-workers.<sup>9</sup> They reported positive  
22  
23 342 association with departments that had high glove consumption per HCWs. A possible reason for  
24  
25  
26  
27 343 our observation is that HCWs with latex sensitisation may have been relocated to wards with low  
28  
29 344 glove consumptions to minimise the exposure. In addition, the annual pair of gloves  
30  
31 345 consumption per HCW by department does not provide an accurate indication of individual  
32  
33 346 exposure; rather it gives us the annual distribution of gloves to different departments.

34  
35  
36  
37 347 Several studies have reported atopy as a significant risk factor for latex sensitisation.<sup>9, 10, 36</sup>  
38  
39 348 Similarly, the prevalence of reporting a history of personal atopy in this study was higher among  
40  
41 349 latex sensitised participants although the association was not statistically significant. Watts and  
42  
43 350 colleagues reported that the risk of latex sensitisation was increased by 14 times in the presence  
44  
45 351 of personal atopy and 4 times in the presence of a family history atopy among 122 American  
46  
47 352 HCWs studied.<sup>10</sup> Contrary to Watts and co-workers findings, the risk of latex sensitisation did  
48  
49 353 not increase with a reporting of family history of atopy in our study population.<sup>10</sup>  
50  
51  
52

53  
54 354 Fruit latex allergy syndrome is a phenomenon seen where latex sensitised individuals  
55  
56  
57 355 demonstrate a cross reactivity with specific foods; particularly fruit. Studies have identified this  
58  
59  
60

1  
2  
3 356 phenomenon among sensitised HCWs and the general population. This has been attributed to the  
4  
5 357 similarity between fruit proteins and latex allergens.<sup>38</sup> Fruit allergy was significantly associated  
6  
7  
8 358 with latex sensitisation and latex allergy in our study. Our study was dependent on the self-  
9  
10 359 reporting of fruit allergy and no objective tests were carried out. It is therefore possible that  
11  
12 360 participants have independent simultaneous allergies to both fruit and latex without cross  
13  
14  
15 361 reactivity. Also, we were unable to determine whether latex sensitisation preceded the  
16  
17 362 development of fruit allergy or vice versa.

18  
19  
20  
21 363 Latex sensitised participants reported a high prevalence of a history of previous open surgery in  
22  
23 364 our study. This has been reported to occur as a result of direct intraoperative exposure to latex  
24  
25 365 containing medical devices such as catheters or tubes. Studies in children with congenital  
26  
27  
28 366 abnormalities have demonstrated that the risk for latex allergy increases with the number of open  
29  
30 367 surgical procedures that they undergo.<sup>39</sup> Frequency of invasive procedures among adults was  
31  
32  
33 368 shown to increase the risk of latex sensitisation reporting while more than 10 procedures  
34  
35 369 increased the risk of developing latex allergy.<sup>40</sup>

36  
37  
38 370 Strengths of this study include the high response rate (85.5%) and comparability to other  
39  
40 371 studies.<sup>8, 16</sup> Access to the hospital employee database allowed us to better assess the  
41  
42 372 representativeness of this study population by comparing demographic data of the non-  
43  
44  
45 373 participants and the participants. The participants were randomly selected minimising the  
46  
47 374 potential of participant's bias that comes with a volunteer approach.

48  
49  
50  
51 375 The presence of a control group provided a background prevalence of latex sensitisation in this  
52  
53 376 population which allowed for a better estimation of associations attributable to work related  
54  
55  
56 377 factors. The use of Stallergenes latex specific SPT further strengthens the study. The SPT test is  
57  
58  
59  
60

1  
2  
3 378 regarded as the gold standard for the diagnosis of latex allergy and Stallergenes has been shown  
4  
5 379 to have a diagnostic sensitivity and specificity of 93% and 100%, respectively.<sup>32</sup> The research  
6  
7  
8 380 assistant employed on this study was trained and initially shadowed and periodically supervised  
9  
10 381 by the principal investigator to ensure appropriate administration of the questionnaire and the  
11  
12 382 SPT thereby improving the reliability and validity of the study.

13  
14  
15  
16 383 This study was limited by the cross sectional study design which was relatively low in cost and  
17  
18 384 quick to conduct. It only allowed for the determination of prevalence of latex sensitisation at one  
19  
20 385 point in time. Consequently the prevalence of latex sensitisation may have been underestimated  
21  
22 386 as it is possible that HCWs who had already developed latex sensitisation have left the hospital  
23  
24 387 before the study was conducted. Recall bias is another potential limitation in this study as  
25  
26 388 workers were asked to recall the number of gloves used in the past 7 working days. HCWs may  
27  
28 389 have overestimated or underestimated their individual exposures. Our study depended on self-  
29  
30 390 reporting of personal and family atopic disorders and this may have resulted in the  
31  
32 391 misclassification of atopy.

## 33 34 35 36 37 38 392 **CONCLUSION**

39  
40 393 This study shows that even in the presence of powder free hypoallergenic glove use there is latex  
41  
42 394 sensitisation and latex allergy, adding to previous findings that HCWs exposed to hypoallergenic  
43  
44 395 latex gloves are still at risk for developing latex sensitisation and latex allergy. This indicates that  
45  
46 396 latex sensitisation and allergy are still an important occupational hazard for HCWs. While it may  
47  
48 397 be economically impractical to replace the latex gloves in our setting, reduction of allergen  
49  
50 398 content in latex products is another strategy that can be implemented to address the problem and  
51  
52 399 protect HCWs. A policy accompanied by clear implementation plans as well as sustainable  
53  
54 400 education and training programmes to address latex sensitisation and allergy among HCWs

1  
2  
3 401 should be implemented.<sup>41</sup> In addition HCWs must be continuously monitored for the  
4  
5  
6 402 development of latex sensitisation and alternate latex free glove must be made available for  
7  
8 403 them. More research is needed to identify the most cost effective way of implementing a latex  
9  
10 404 free environment in resource limited countries, such as South Africa. In addition the current  
11  
12 405 studies in South Africa have largely been cross-sectional in nature. More cohort analysis is  
13  
14  
15 406 required to better understand the chronicity of illness and disability associated with latex allergy.  
16  
17

## 18 **ACKNOWLEDGEMENT**

19  
20  
21 408 I would like to thank the hospital employees participating in this study and their management for  
22  
23 409 allowing me access to the human resource database. I would like to thank Professor Mohamed  
24  
25 410 Jeebhay (Centre of Occupational and Environmental Health, University of Cape Town, SA) and  
26  
27  
28 411 Professor David L Nordstrom (Occupational and Environmental Safety and Health, University of  
29  
30 412 Wisconsin-Whitewater, USA) for their comments on my initial proposal. I would like to thank  
31  
32  
33 413 Professor Rajen Naidoo (Discipline of Occupational and Environmental Health, UKZN, SA) for  
34  
35 414 his statistical advice during the data analysis. In addition thank you to Mr. Nhlanhla Jwara for  
36  
37 415 conducting the field work.  
38  
39  
40  
41  
42  
43  
44  
45  
46  
47  
48  
49  
50  
51  
52  
53  
54  
55  
56  
57  
58  
59  
60

1  
2  
3 416 **Contributorship**  
4  
5

6  
7 417 Dr Shumani Phaswana is the principal investigator who was involved from the conception of the idea,  
8  
9 418 proposal writing, data collection, data management and interpretation of the results.

10  
11 419 Dr Saloshni Naidoo contributed to the conception and design of the study, analysis and interpretation of  
12  
13 420 the data, critical review of the intellectual content of the article and final approval of the article.  
14  
15

16  
17 421 **Data sharing**  
18  
19

20 422 No additional unpublished data  
21  
22

23  
24 423 **Funding**  
25  
26

27 424 None  
28  
29

30 425 **Competing interests**  
31  
32

33  
34 426 None  
35  
36  
37  
38  
39  
40  
41  
42  
43  
44  
45  
46  
47  
48  
49  
50  
51  
52  
53  
54  
55  
56  
57  
58  
59  
60

427

428 **REFERENCES**

- 429 1. Nutter AF. Contact urticaria to rubber. *The Bri J Dermatol* 1979;101:597-8.
- 430 2. Recommendations for prevention of HIV transmission in health-care settings. *MMWR. Morb*  
431 *Mortality Wkly Rep* 1987;36 Suppl 2:1S-18S.
- 432 3. Rego A, Roley L. In-use barrier integrity of gloves: latex and nitrile superior to vinyl. *Am J*  
433 *Infect Control* 1999;27:405-10.
- 434 4. Leung R, Ho A, Chan J, et al. Prevalence of latex allergy in hospital staff in Hong Kong. *Clin*  
435 *Exp Allergy* 1997;27:167-74.
- 436 5. Chaiear N, Jindawong B, Boonsawas W, et al. Glove allergy and sensitization to natural  
437 rubber latex among nursing staff at Srinagarind Hospital, Khon Kaen, Thailand. *J Med*  
438 *Assoc Thailand* 2006;89:368-76.
- 439 6. Wan KS, Lue HC. Latex allergy in health care workers in Taiwan: prevalence, clinical  
440 features. *Int Arch Occup Environ Health* 2007;80:455-7.
- 441 7. Douglas R, Morton J, Czarny D, et al. Prevalence of IgE-mediated allergy to latex in hospital  
442 nursing staff. *Aust N Z J Med* 1997;27:165-9.
- 443 8. Grzybowski M, Ownby DR, Peyser PA, et al. The prevalence of anti-latex IgE antibodies  
444 among registered nurses. *J Allerg Clin Immunol* 1996;98:535-44.
- 445 9. Liss GM, Sussman GL, Deal K, et al. Latex allergy: epidemiological study of 1351 hospital  
446 workers. *Occup Environ Med* 1997;54:335-42.
- 447 10. Watts DN, Jacobs RR, Forrester B, et al. An evaluation of the prevalence of latex sensitivity  
448 among atopic and non-atopic intensive care workers. *Am J Ind Med* 1998;34:359-63.
- 449 11. Verna N, Di Giampaolo L, Renzetti A, et al. Prevalence and risk factors for latex-related  
450 diseases among healthcare workers in an Italian general hospital. *Ann Clin Lab Sci*  
451 2003;33:184-91.
- 452 12. Porri F, Lemiere C, Birnbaum J, et al. Prevalence of latex sensitization in subjects attending  
453 health screening: implications for a perioperative screening. *Clin Exp Allergy*  
454 1997;27:413-7.
- 455 13. Bousquet J, Flahault A, Vandenplas O, et al. Natural rubber latex allergy among health care  
456 workers: a systematic review of the evidence. *J Allerg Clin Immunol* 2006;118:447-54.

- 1  
2  
3 457 14. Brathwaite N, Motala C, Toerien A, et al. Latex allergy--the Red Cross Children's Hospital  
4 458 experience. *S Afri Med J* 2001;91:750-1.  
5  
6 459 15. De Beers C, Cilliers J. Accurate diagnosis of latex allergy in hospital employees is cost-  
7 460 effective. *Curr Allergy Clin Immunol* . 2004;17: 33-36.  
8  
9 461 16. Potter PC, Crombie I, Marian A, et al. Latex allergy at Groote Schuur Hospital--prevalence,  
10 462 clinical features and outcome. *S Afr Med J* 2001;91:760-5.  
11  
12 463 17. Department of Labour. Compensation of Occupational Injuries and Diseases Act No. 130  
13 464 1993. 1993. Pretoria  
14  
15 465 18. Hnizdo E, Esterhuizen TM, Rees D, et.al. Occupational asthma as identified by the  
16 466 Surveillance of Work-related and Occupational Respiratory Diseases programme in  
17 467 South Africa. *Clin Exp Allergy* 2001;31:32-9.  
18  
19 468 19. Allmers H, Brehler R, Chen Z, et al. Reduction of latex aeroallergens and latex-specific IgE  
20 469 antibodies in sensitized workers after removal of powdered natural rubber latex gloves in  
21 470 a hospital. *J Allerg Clin Immunol* 1998;102:841-6.  
22  
23 471 20. Wrangsjö K, Boman A, Liden C, et al. Primary prevention of latex allergy in healthcare-  
24 472 spectrum of strategies including the European glove standardization. *Contact Dermatitis*  
25 473 2012;66:165-71.  
26  
27 474 21. Malerich PG, Wilson ML, Mowad CM. The effect of a transition to powder-free latex gloves  
28 475 on workers' compensation claims for latex-related illness. *Dermatitis* 2008;19:316-8.  
29  
30 476 22. Baur X, Chen Z, Allmers H. Can a threshold limit value for natural rubber latex airborne  
31 477 allergens be defined? *J Allerg Clin Immunol* 1998;101:24-7.  
32  
33 478 23. Hayes BB, Afshari A, Millecchia L, et al. Evaluation of percutaneous penetration of natural  
34 479 rubber latex proteins. *Toxicol Sci* 2000;56:262-70.  
35  
36 480 24. Mabe DO, Singh TS, Bello B, et al. Allergenicity of latex rubber products used in South  
37 481 African dental schools. *S Afri Med J* 2009;99:672-4.  
38  
39 482 25. Department of Labour. Occupational health and Safety Act no 85 of 1993. 1993, Pretoria.  
40  
41 483 26. Potter PC. Latex allergy--time to adopt a powder-free policy nationwide. *S Afri Med J*  
42 484 2001;91:746-8.  
43  
44 485 27. Liss GM, Tarlo SM. Natural rubber latex-related occupational asthma: association with  
45 486 interventions and glove changes over time. *Am J Ind Med* 2001;40:347-53.  
46  
47  
48  
49  
50  
51  
52  
53  
54  
55  
56  
57  
58  
59  
60



- 1  
2  
3 487 28. Hunt LW, Kelkar P, Reed CE, et al. Management of occupational allergy to natural rubber  
4  
5 488 latex in a medical center: the importance of quantitative latex allergen measurement and  
6  
7 489 objective follow-up. *J Allerg Clin Immunol* 2002;110(Suppl 2):S96-106.  
8  
9 490 29. Schmid K, Christoph Broding H, Niklas D, et al. Latex sensitization in dental students using  
10  
11 491 powder-free gloves low in latex protein:a cross-sectional study. *Contact dermatitis*  
12  
13 492 2002;47:103-8.  
14 493 30. Clayton TH, Wilkinson SM. Contact dermatoses in healthcare workers: reduction in type I  
15  
16 494 latex allergy in a UK centre. *Clin Exp Dermatol* 2005;30:221-5.  
17 495 31. Vandenas O, Delwiche JP, Depelchin S, et al. Latex gloves with a lower protein content  
18  
19 496 reduce bronchial reactions in subjects with occupational asthma caused by latex. *Amr J*  
20  
21 497 *Respir Crit Care Med* 1995;151:887-91.  
22  
23 498 32. Turjanmaa K, Palosuo T, Alenius H, et al. Latex allergy diagnosis: in vivo and in vitro  
24  
25 499 standardization of a natural rubber latex extract. *Allergy* 1997;52:41-50.  
26 500 33. Morris A. Allsa Position Statement:Allergen Skin-Prick Testing. *Curr Allergy Clin Immunol*  
27  
28 501 2006;90:22-25.  
29  
30 502 34. Jones KP, Rolf S, Stingl C, et al. Longitudinal study of sensitization to natural rubber latex  
31  
32 503 among dental school students using powder-free gloves. *Ann Occup Hyg* 2004;48:455-7.  
33 504 35. Tang MB, Leow YH, Ng V, et al. Latex sensitisation in healthcare workers in Singapore. *Ann*  
34  
35 505 *Acad Med, Singapore* 2005;34:376-82.  
36  
37 506 36. Suli C, Parziale M, Lorini M, et al. Prevalence and risk factors for latex allergy: a cross  
38  
39 507 sectional study on health-care workers of an Italian hospital. *J Investig Allergol Clin*  
40  
41 508 *Immunol* 2004;14:64-9.  
42 509 37. Smith AM, Amin HS, Biagini RE, et al. Percutaneous reactivity to natural rubber latex  
43  
44 510 proteins persists in health-care workers following avoidance of natural rubber latex. *Clin*  
45  
46 511 *Exp Allergy* 2007;37:1349-56.  
47  
48 512 38. Blanco C. Latex-fruit syndrome. *Curr Allergy Asthma Rep* 2003;3:47-53.  
49 513 39. Porri F, Pradal M, Lemiere C, et al. Association between latex sensitization and repeated  
50  
51 514 latex exposure in children. *Anesthesiology* 1997;86:599-602.  
52  
53 515 40. Rueff F, Kienitz A, Schopf P, et al. Frequency of natural rubber latex allergy in adults is  
54  
55 516 increased after multiple operative procedures. *Allergy* 2001;56(9):889-94  
56  
57  
58  
59  
60

1  
2  
3 517 41. Brown RH, Hamilton RG, McAllister MA. How health care organizations can establish and  
4  
5 518 conduct a program for a latex-safe environment. *Jt Comm J Qual Saf* 2003;29:113-23.  
6  
7

8 519  
9  
10

| Characteristic         | Exposed<br>N (%) | Unexposed<br>N (%) |
|------------------------|------------------|--------------------|
| Number of participants | 337 (67.3)       | 164 (32.7)         |
| <b>Demographics</b>    |                  |                    |

11  
12  
13  
14  
15  
16  
17  
18  
19  
20  
21  
22  
23  
24  
25  
26  
27  
28  
29  
30  
31  
32  
33  
34  
35  
36  
37  
38  
39  
40  
41  
42  
43  
44  
45  
46  
47  
48 **TABLES**

49  
50 521 **Table 1: Demographics and associated risk factors amongst latex exposed and unexposed**  
51  
52 522 **healthcare workers at King Edward VIII Hospital, KwaZulu-Natal South Africa, (n=501)**  
53  
54  
55  
56  
57  
58  
59  
60

|                                             |                     |                       |
|---------------------------------------------|---------------------|-----------------------|
| Age (years)                                 |                     |                       |
| ≤30                                         | 30(8.9)             | 19(11.6)              |
| >30-40                                      | 121(35.9)           | 40(24.4)              |
| >40-50                                      | 101(29.9)           | 59(35.9)              |
| >50                                         | 85(25.2)            | 46(28.1)              |
| Duration of employment (years)              |                     |                       |
| Characteristics                             | Latex SPT +ve† (29) | Latex SPT -ve†† (472) |
| ≤5                                          | 135(401.0%)         | N (%)32(19.5)         |
| >5-10**                                     | 49(14.5)            | 17(10.4)              |
| <b>Demographics</b>                         |                     |                       |
| >15-20                                      | 24(7.1)             | 20(12.2)              |
| >20*                                        | 90(26.7)            | 67(40.9)              |
| Sex **                                      |                     |                       |
| Female                                      | 309(91.7)           | 95(57.9)              |
| Male                                        | 28(8.3)             | 69(42.1)              |
| Job Title (yes)                             |                     |                       |
| Administrative                              |                     | 164(100.0)            |
| Professional nurses                         | 123(36.5)           |                       |
| Enrolled nurses                             | 141(41.8)           |                       |
| Enrolled nursing assistants                 | 73 (21.7)           |                       |
| <b>Medical and Personal History</b>         |                     |                       |
| Personal history of Allergy Disease (yes)   | 147(43.6)           | 83(50.6)              |
| Family history of Allergy Disease (yes)     | 197(58.5)           | 102(62.2)             |
| Fruit allergy (yes)                         | 29(8.6)             | 9(5.5)                |
| Previous open surgery (yes)*                | 168(49.8)           | 61(37.2)              |
| Work-related allergy symptoms(yes)*         | 138(40.9)           | 52(31.7)              |
| Non-occupational latex exposure (yes)       | 161(47.8)           | 76(46.3)              |
| Latex sensitisation (yes)                   | 24(7.1)             | 5(3.1)                |
| Current latex allergy (yes)*                | 20(5.9)             | 3(1.8)                |
| <b>Chi square, *p&lt;0.05, **p&lt;0.001</b> |                     |                       |

523  
524  
525  
526  
527  
528  
529  
530  
531  
532  
533  
534  
535  
536  
537

**Table 2: Comparison of risk factors between latex sensitised (skin prick test positive) and non-sensitised (skin prick test negative) healthcare workers at King Edward VIII Hospital, KwaZulu-Natal South Africa (n=501)**

|                                                |           |                     |            |     |
|------------------------------------------------|-----------|---------------------|------------|-----|
| Age (years.)                                   |           |                     |            | 538 |
| ≤30                                            | 1 (3.5)   |                     | 48(10.2)   | 539 |
| >30-40                                         | 13 (44.8) |                     | 148(31.4)  | 540 |
| >40-50                                         | 8 (27.6)  |                     | 152(32.2)  | 541 |
| >50                                            | 7 (24.1)  |                     | 124(26.3)  | 542 |
| Duration of employment                         |           |                     |            | 543 |
| Characteristics                                | N=2       | Latex Sensitisation | N=23       | 544 |
| ≤5                                             | 3(10.3)   | OR (95%CI)          | 64(13.6)   | 545 |
| >5-10                                          | 16(55.2)  |                     | 151(31.9)  | 546 |
| 10-15                                          | 3(10.3)   |                     | 63(13.4)   | 547 |
| 15-20                                          | 1(3.5)    |                     | 43(9.1)    | 548 |
| ≥20                                            | 1         | 0.23(0.0-1.9)       | 1151(31.9) | 549 |
| Sex (yes)                                      |           |                     |            | 550 |
| Male                                           | 5(17.2)   |                     | 118(25.0)  | 551 |
| Female                                         | 24(82.8)  |                     | 354(75.0)  | 552 |
| Job Title (yes)                                |           |                     |            | 553 |
| Administrative                                 | 5(17.2)   |                     | 159(33.7)  | 554 |
| Professional nurses                            | 5(17.2)   |                     | 118(25.0)  | 555 |
| Enrolled nurses                                | 14(48.3)  |                     | 127(26.9)  | 556 |
| Enrolled nursing assistants                    | 5(17.2)   |                     | 68(14.4)   | 557 |
| <b>Latex Exposure</b>                          |           |                     |            | 558 |
| Exposure status(yes)                           | 24 (82.8) |                     | 313(66.3)  | 559 |
| Type of gloves                                 |           |                     |            | 560 |
| None                                           | 5(17.2)   |                     | 165(34.6)  | 561 |
| Exclusive powdered latex glove (yes)           | 2(6.9)    |                     | 36(7.6)    | 562 |
| Exclusive powder free latex glove (yes)*       | 11(37.9)  |                     | 77(16.3)   | 563 |
| Mixed (yes)                                    | 11(37.9)  |                     | 198(41.9)  | 564 |
| <b>Medical and Personal History</b>            |           |                     |            | 565 |
| Personal history of Allergy Disease (yes)      | 16(55.2)  |                     | 214(45.3)  | 566 |
| Family history of Allergy Disease (yes)        | 18(62.1)  |                     | 281(59.5)  | 567 |
| Fruit allergy (yes) *                          | 5(17.2)   |                     | 33(6.9)    | 568 |
| Previous open surgery (yes)                    | 18(62.1)  |                     | 211(44.7)  | 569 |
| Non-occupational latex exposure (yes)          | 12(41.4)  |                     | 225(47.7)  | 570 |
| Reaction to other latex medical devices (yes)* | 3(10.3)   |                     | 8(1.7)     | 571 |
| <b>Chi Square, *p&lt;0.05</b>                  |           |                     |            | 572 |
| <b>†Latex Skin Prick Test Positive</b>         |           |                     |            | 573 |
| <b>#Latex Skin Prick Test Negative</b>         |           |                     |            | 574 |

575

576

577

578

579 **Table 3: Crude Odds Ratios (OR) (95%CI) of demographics, exposure status, medical and personal**580 **history and latex sensitisation and latex allergy amongst healthcare workers at King Edward VIII**581 **Hospital, KwaZulu-Natal South Africa, (n=501)**

582

583

584

585

586

587

588

589

590

|                                                                               |    |               |    |                               |
|-------------------------------------------------------------------------------|----|---------------|----|-------------------------------|
| >30-40                                                                        | 13 | 1.8(0.8-3.7)  | 11 | 2.0(0.9-4.6) <sup>582</sup>   |
| >40-50                                                                        | 8  | 0.8(0.4-1.8)  | 7  | 0.9(0.4-2.2)                  |
| >50                                                                           | 7  | 0.8(0.4-2.1)  | 4  | 0.6(0.2-1.7) <sup>583</sup>   |
| <b>Duration of employment (years)</b>                                         |    |               |    |                               |
| <5                                                                            | 3  | 0.7(0.2-2.4)  | 3  | 0.9(0.3-3.2) <sup>584</sup>   |
| 5-10                                                                          | 16 | 2.6(1.2-5.5)* | 14 | 3.3(1.4-7.6)* <sup>585</sup>  |
| >10-15                                                                        | 3  | 0.7(0.2-2.4)  | 3  | 0.9(0.3-3.2)                  |
| >15-20                                                                        | 1  | 0.4(0.0-2.1)  | 1  | 0.5(0.0-2.8) <sup>586</sup>   |
| >20                                                                           | 6  | 0.5(0.2-1.4)  | 2  | 0.2(0.0-0.8)*                 |
| <b>Sex (yes)</b>                                                              |    |               |    |                               |
| Female                                                                        | 24 | 1.6(0.6-4.1)  | 20 | 2.2(0.7-7.2) <sup>587</sup>   |
| <b>Job Title (yes)</b>                                                        |    |               |    |                               |
| Administrative                                                                | 5  | 0.4(0.2-1.1)  | 3  | 0.3(0.1-0.9)* <sup>588</sup>  |
| Professional nurses                                                           | 5  | 0.6(0.2-1.6)  | 4  | 0.6(0.2-1.8)                  |
| Enrolled nurses                                                               | 14 | 2.5(1.2-5.3)* | 11 | 2.4(1.1-5.6)* <sup>589</sup>  |
| Enrolled nursing assistants                                                   | 5  | 1.2(0.5-3.3)  | 5  | 1.7(0.6-4.5) <sup>590</sup>   |
| <b>Latex Exposure</b>                                                         |    |               |    |                               |
| Exposure status (yes)                                                         | 24 | 2.4(0.9-6.3)  | 20 | 3.4(1.1-10.8)* <sup>591</sup> |
| <b>Type of gloves</b>                                                         |    |               |    |                               |
| None                                                                          | 5  | 0.4(0.2-1.0)  | 3  | 0.3(0.1-0.9)* <sup>592</sup>  |
| Exclusive Powdered latex glove (yes)                                          | 2  | 0.9(0.0-3.6)  | 2  | 1.2(0.0-1.7) <sup>593</sup>   |
| Exclusive Powder free latex glove (yes)                                       | 11 | 3.1(1.4-6.8)* | 10 | 3.1(1.7-9.1)* <sup>594</sup>  |
| Mixed gloves(yes)                                                             | 11 | 0.8(0.4-1.8)  | 8  | 0.7(0.3-1.7)                  |
| <b>Medical and Personal History</b>                                           |    |               |    |                               |
| Personal history of Allergy Disease (yes)                                     | 16 | 1.4(0.7-3.1)  | 12 | 1.3(0.5-2.9) <sup>595</sup>   |
| Family history of Allergy Disease (yes)                                       | 18 | 1.1(0.5-2.4)  | 14 | 1.1(0.5-2.4) <sup>596</sup>   |
| Fruit allergy (yes)                                                           | 5  | 2.8(1.0-7.5)  | 5  | 3.7(1.4-10.5) <sup>597</sup>  |
| Previous open surgery (yes)                                                   | 18 | 1.1(0.5-2.4)  | 14 | 1.5(0.7-3.1) <sup>598</sup>   |
| <b>Chi square, *p&lt;0.05</b>                                                 |    |               |    |                               |
| †Latex Skin Prick Test Positive                                               |    |               |    | 599                           |
| ‡Latex Skin Prick Test Positive and work related clinical symptoms of allergy |    |               |    | 600                           |

601

602

603

604

605

606

607

1  
2  
3  
4  
5  
6  
7  
8  
9  
10  
11  
12  
13  
14  
15  
16  
17  
18  
19  
20  
21  
22  
23  
24  
25  
26  
27  
28  
29  
30  
31  
32  
33  
34  
35  
36  
37  
38  
39  
40  
41  
42  
43  
44  
45  
46  
47  
48  
49

**Table 4: Multivariate analysis of demographics, medical and personal history, exposure history and latex sensitisation (LS)<sup>†</sup> and latex allergy (LA)<sup>#</sup> amongst healthcare workers at King Edward III Hospital, KwaZulu-Natal South Africa, (n=501)**

| Characteristics                              | MODEL I* (n=501) |               | MODEL II** (n=501) |               | MODEL III***(n=202) |               | MODEL IV****(n=252) |               |
|----------------------------------------------|------------------|---------------|--------------------|---------------|---------------------|---------------|---------------------|---------------|
|                                              | LS OR (95%CI)    | LA OR (95%CI) | LS OR (95%CI)      | LA OR (95%CI) | LS OR (95%CI)       | LA OR (95%CI) | LS OR (95%CI)       | LA OR (95%CI) |
| <b>Demographics</b>                          |                  |               |                    |               |                     |               |                     |               |
| Sex (female)                                 | 0.9(0.2-2.7)     | 1.1(0.3-4.4)  | 0.9(0.3-2.7)       | 1.1(0.3-4.5)  | 0.3(0.0-1.8)        | 0.3(0.0-3.1)  | 2.5(0.5-12.2)       | 2.5(0.5-12.2) |
| Duration of employment (years)               | 0.9(0.9-1.0)     | 0.9(0.8-0.9)  | 0.9(0.9-1.0)       | 0.9(0.8-0.8)  | 0.9(0.9-1.8)        | 0.7(0.5-1.0)  | 0.9(0.9-1.0)        | 0.9(0.9-1.0)  |
| <b>Latex Exposure</b>                        |                  |               |                    |               |                     |               |                     |               |
| Exposure status(yes)                         | 2.2(0.7-6.7)     | 2.6(0.7-9.8)  |                    |               |                     |               |                     |               |
| Type of gloves                               |                  |               |                    |               |                     |               |                     |               |
| None                                         |                  |               | 1                  | 1             |                     |               |                     |               |
| Exclusive lightly powdered latex glove (yes) |                  |               | 1.6(0.3-9.8)       | 2.6(0.4-17.7) |                     |               |                     |               |
| Exclusive Powder free latex glove (yes)      |                  |               | 4.2(1.2-14.1)      | 5.1(1.2-21.2) |                     |               |                     |               |
| Mixed gloves (yes)                           |                  |               | 1.7(0.5-5.6)       | 1.7(0.4-7.1)  |                     |               |                     |               |

|                                                      |               |              |              |              |               |                |              |               |
|------------------------------------------------------|---------------|--------------|--------------|--------------|---------------|----------------|--------------|---------------|
| Pairs of Powdered latex Gloves in the last 7 days    |               |              |              |              | 1.1(1.0-1.2)  | 1.2(1.0-1.4)   |              |               |
| Pairs of Powder Free Latex Gloves in the last 7 days |               |              |              |              |               |                | 1.0(0.9-1.1) | 1.0(0.9-1.1)  |
| <b>Personal and Medical History</b>                  |               |              |              |              |               |                |              |               |
| Personal history of allergy disease (yes)            | 1.5(0.7-3.3)  | 1.4(0.6-3.2) | 1.5(0.7-3.3) | 1.3(0.6-3.2) | 1.4(0.3-6.8)  | 1.6(0.2-11.6)  | 1.0(0.4-2.9) | 0.9(0.3-2.8)  |
| Family history of allergy disease (yes)              | 1.0(0.45-2.2) | 0.9(0.4-2.2) | 1.1(0.5-2.3) | 0.9(0.4-2.3) | 0.4(0.1-1.9)  | 0.5(0.1-3.6)   | 0.7(0.2-2.0) | 0.8(0.3-2.7)  |
| Fruit allergy (yes)                                  | 2.3(0.8-6.7)  | 3.1(1.1-9.2) | 2.2(0.8-6.5) | 3.0(0.9-9.1) | 5.0(0.4-56.9) | 9.7(0.6-163.0) | 1.7(0.3-8.5) | 2.0(0.4-10.4) |
| Previous open surgery (yes)                          | 2.0(0.9-4.4)  | 1.9(0.8-4.6) | 2.1(0.9-4.6) | 1.9(0.8-4.7) | 1.4(0.3-7.4)  | 1.2(0.1-11.1)  | 1.1(0.4-3.2) | 1.2(0.4-3.8)  |

†Latex Skin Prick Test Positive

‡Latex Skin Prick Test Positive and work related clinical symptoms of allergy

\*Model included latex glove exposure status

\*\*Model included type of gloves

\*\*\*Model included number of pairs of powdered latex gloves

\*\*\*\*Model included number of pairs of powder free latex gloves

1  
2  
3  
4  
5  
6  
7  
8  
9  
10  
11  
12  
13  
14  
15  
16  
17  
18  
19  
20  
21  
22  
23  
24  
25  
26  
27  
28  
29  
30  
31  
32  
33  
34  
35  
36  
37  
38  
39  
40  
41  
42  
43  
44  
45  
46  
47  
48  
49  
50  
51  
52  
53  
54  
55  
56  
57  
58  
59  
60STROBE Statement—Checklist of items that should be included in reports of *cross-sectional studies*

|                              | Item No | Recommendation                                                                                                                                                                                                                                                                                                                                                                                                |
|------------------------------|---------|---------------------------------------------------------------------------------------------------------------------------------------------------------------------------------------------------------------------------------------------------------------------------------------------------------------------------------------------------------------------------------------------------------------|
| <b>Title and abstract</b>    | 1       | (a) Indicate the study's design with a commonly used term in the title or the abstract<br>(b) Provide in the abstract an informative and balanced summary of what was done and what was found                                                                                                                                                                                                                 |
| <b>Introduction</b>          |         |                                                                                                                                                                                                                                                                                                                                                                                                               |
| Background/rationale         | 2       | Explain the scientific background and rationale for the investigation being reported                                                                                                                                                                                                                                                                                                                          |
| Objectives                   | 3       | State specific objectives, including any prespecified hypotheses                                                                                                                                                                                                                                                                                                                                              |
| <b>Methods</b>               |         |                                                                                                                                                                                                                                                                                                                                                                                                               |
| Study design                 | 4       | Present key elements of study design early in the paper                                                                                                                                                                                                                                                                                                                                                       |
| Setting                      | 5       | Describe the setting, locations, and relevant dates, including periods of recruitment, exposure, follow-up, and data collection                                                                                                                                                                                                                                                                               |
| Participants                 | 6       | (a) Give the eligibility criteria, and the sources and methods of selection of participants                                                                                                                                                                                                                                                                                                                   |
| Variables                    | 7       | Clearly define all outcomes, exposures, predictors, potential confounders, and effect modifiers. Give diagnostic criteria, if applicable                                                                                                                                                                                                                                                                      |
| Data sources/<br>measurement | 8*      | For each variable of interest, give sources of data and details of methods of assessment (measurement). Describe comparability of assessment methods if there is more than one group                                                                                                                                                                                                                          |
| Bias                         | 9       | Describe any efforts to address potential sources of bias                                                                                                                                                                                                                                                                                                                                                     |
| Study size                   | 10      | Explain how the study size was arrived at                                                                                                                                                                                                                                                                                                                                                                     |
| Quantitative variables       | 11      | Explain how quantitative variables were handled in the analyses. If applicable, describe which groupings were chosen and why                                                                                                                                                                                                                                                                                  |
| Statistical methods          | 12      | (a) Describe all statistical methods, including those used to control for confounding<br>(b) Describe any methods used to examine subgroups and interactions<br>(c) Explain how missing data were addressed<br>(d) If applicable, describe analytical methods taking account of sampling strategy<br>(e) Describe any sensitivity analyses                                                                    |
| <b>Results</b>               |         |                                                                                                                                                                                                                                                                                                                                                                                                               |
| Participants                 | 13*     | (a) Report numbers of individuals at each stage of study—eg numbers potentially eligible, examined for eligibility, confirmed eligible, included in the study, completing follow-up, and analysed<br>(b) Give reasons for non-participation at each stage<br>(c) Consider use of a flow diagram                                                                                                               |
| Descriptive data             | 14*     | (a) Give characteristics of study participants (eg demographic, clinical, social) and information on exposures and potential confounders<br>(b) Indicate number of participants with missing data for each variable of interest                                                                                                                                                                               |
| Outcome data                 | 15*     | Report numbers of outcome events or summary measures                                                                                                                                                                                                                                                                                                                                                          |
| Main results                 | 16      | (a) Give unadjusted estimates and, if applicable, confounder-adjusted estimates and their precision (eg, 95% confidence interval). Make clear which confounders were adjusted for and why they were included<br>(b) Report category boundaries when continuous variables were categorized<br>(c) If relevant, consider translating estimates of relative risk into absolute risk for a meaningful time period |
| Other analyses               | 17      | Report other analyses done—eg analyses of subgroups and interactions, and sensitivity analyses                                                                                                                                                                                                                                                                                                                |



| <b>Discussion</b>        |    |                                                                                                                                                                            |
|--------------------------|----|----------------------------------------------------------------------------------------------------------------------------------------------------------------------------|
| Key results              | 18 | Summarise key results with reference to study objectives                                                                                                                   |
| Limitations              | 19 | Discuss limitations of the study, taking into account sources of potential bias or imprecision. Discuss both direction and magnitude of any potential bias                 |
| Interpretation           | 20 | Give a cautious overall interpretation of results considering objectives, limitations, multiplicity of analyses, results from similar studies, and other relevant evidence |
| Generalisability         | 21 | Discuss the generalisability (external validity) of the study results                                                                                                      |
| <b>Other information</b> |    |                                                                                                                                                                            |
| Funding                  | 22 | Give the source of funding and the role of the funders for the present study and, if applicable, for the original study on which the present article is based              |

\*Give information separately for exposed and unexposed groups.

**Note:** An Explanation and Elaboration article discusses each checklist item and gives methodological background and published examples of transparent reporting. The STROBE checklist is best used in conjunction with this article (freely available on the Web sites of PLoS Medicine at <http://www.plosmedicine.org/>, Annals of Internal Medicine at <http://www.annals.org/>, and Epidemiology at <http://www.epidem.com/>). Information on the STROBE Initiative is available at [www.strobe-statement.org](http://www.strobe-statement.org).



**The prevalence of latex sensitisation and allergy and associated risk factors amongst health care workers using hypoallergenic latex gloves at King Edward VIII hospital, KwaZulu-Natal South Africa: A cross sectional study**

|                                 |                                                                                                                                                                               |
|---------------------------------|-------------------------------------------------------------------------------------------------------------------------------------------------------------------------------|
| Journal:                        | <i>BMJ Open</i>                                                                                                                                                               |
| Manuscript ID:                  | bmjopen-2013-002900.R1                                                                                                                                                        |
| Article Type:                   | Research                                                                                                                                                                      |
| Date Submitted by the Author:   | 12-Aug-2013                                                                                                                                                                   |
| Complete List of Authors:       | Phaswana, Shumani; University of KwaZulu Natal, Occupational and Environmental Health<br>Naidoo, Saloshni; University of KwaZulu Natal, Occupational and Environmental Health |
| <b>Primary Subject Heading</b>: | Occupational and environmental medicine                                                                                                                                       |
| Secondary Subject Heading:      | Immunology (including allergy), Occupational and environmental medicine, Epidemiology                                                                                         |
| Keywords:                       | Latex, Hypoallergenic, Healthcare workers, South Africa                                                                                                                       |
|                                 |                                                                                                                                                                               |

SCHOLARONE™  
Manuscripts

1  
2  
3 1 **The prevalence of latex sensitisation and allergy and associated risk factors among healthcare**  
4 **workers using hypoallergenic latex gloves at King Edward VIII Hospital, KwaZulu-Natal South**  
5 **Africa: A cross sectional study**  
6  
7  
8

9  
10 4  
11 5 S M Phaswana<sup>1</sup>, S Naidoo<sup>1</sup>

12  
13 6 <sup>1</sup>Discipline of Occupational and Environmental Health, School of Nursing and Public Health,  
14 7 University of kwaZulu Natal, South Africa  
15

16 8  
17  
18 9 Contact Details for Corresponding Author  
19

20 10 Dr Shumani Makwarela Phaswana  
21

22 11 306 Valhaven  
23

24 12 80 Cromwell Road  
25

26 13 Glenwood  
27

28 14 Durban  
29

30 15 4001  
31

32 16 E-mail: [shuma8008@yahoo.com](mailto:shuma8008@yahoo.com)  
33

34 17 Tel nr: 031 260 4507  
35

36 18 Fax nr: 031 260 4663  
37

38 19  
39  
40 20 Keywords: Latex, hypoallergenic, healthcare workers, South Africa  
41

42 21 Word Count:  
43

44 22 Abstract: 299  
45

46 23 Body: 4,359  
47

48 24  
49  
50  
51

52 25  
53  
54

55 26  
56  
57  
58  
59  
60

27

**ARTICLE SUMMARY****ARTICLE FOCUS**

- The use of hypoallergenic latex gloves has been adopted as policy in different healthcare settings globally.
- However, information with regard to their use and the development of latex sensitisation and allergy among exposed healthcare workers is limited.
- We hypothesised that there is latex sensitization and allergy in healthcare workers using hypoallergenic latex gloves in a South African hospital.

**KEY MESSAGE**

- In the presence of powder free hypoallergenic gloves, latex sensitisation and latex allergy is still an important occupational health effect in healthcare workers.
- Healthcare workers should be continuously monitored for the development of latex sensitisation and allergy.
- There is a need for a national policy accompanied by clear implementation plans as well as sustainable education and training programmes to address latex sensitisation and allergy among HCWs.

**STRENGTH AND LIMITATIONS**

- Strength of the study included the presence of a control group providing a background prevalence of latex sensitisation in this population and random selection of participants which minimised the potential of participant bias that arises with a volunteer approach.
- This study was limited by the cross sectional study design as it only allowed for the determination of the prevalence of latex sensitisation; recall bias with regard to the number of gloves used in the past 7 working days and the self-reporting of personal and family atopic disorders may have resulted in the misclassification of exposure and atopy respectively.

28

29

30

1  
2  
3  
4  
5  
6  
7  
8  
9  
10  
11  
12  
13  
14  
15  
16  
17  
18  
19  
20  
21  
22  
23  
24  
25  
26  
27  
28  
29  
30  
31  
32  
33  
34  
35  
36  
37  
38  
39  
40  
41  
42  
43  
44  
45  
46  
47  
48  
49  
50  
51  
52  
53  
54  
55  
56  
57  
58  
59  
60

31 **What this paper adds**

32  In the presence of powder free hypoallergenic gloves, latex sensitisation and latex allergy is still an  
33 important occupational health hazard in healthcare workers

34  Healthcare workers should be continuously monitored for the development of latex sensitisation and  
35 allergy

36  There is a need for a national policy accompanied by clear implementation plans as well as sustainable  
37 education and training programmes to address latex sensitisation and allergy among HCWs

38

For peer review only

1  
2  
3 39  
4  
5  
67 **40 ABSTRACT**8  
9 **41 Objectives**

10  
11  
12 42 The present study describes latex sensitisation and allergy prevalence and associated factors among  
13  
14 43 healthcare workers using hypoallergenic latex gloves at King Edward VIII Hospital in KwaZulu-Natal  
15  
16  
17 44 South Africa.

18  
19  
20 **45 Design**

21  
22  
23 46 Cross sectional study

24  
25  
26 **47 Setting**

27  
28  
29 48 A tertiary hospital in eThekweni municipality, KwaZulu Natal, South Africa

30  
31  
32 **49 Participants**

33  
34  
35 50 600 healthcare workers were randomly selected and 501(337 exposed and 164 unexposed) participated.  
36  
37 51 Participants who were pregnant, less than one year of work as healthcare worker and history of  
38  
39 52 anaphylactic reaction were excluded from the study.

40  
41  
42 **53 Primary and secondary outcome measures**

43  
44  
45 54 Latex sensitisation and latex allergy were the outcome of interest and they were successfully measured

46  
47  
48 **55 Results**

49  
50  
51 56 Prevalence of latex sensitisation and allergy was observed among exposed workers (7.1% and 5.9%) and  
52  
53 57 unexposed workers (3.1% and 1.8%). Work related allergy symptoms were significantly higher in  
54  
55 58 exposed workers (40.9%,  $p < 0.05$ ). Duration of employment was inversely associated with latex allergy  
56  
57 59 (OR: 0.9; 95% CI: 0.8-0.9). The risk of latex sensitisation (OR: 4.2; 95% CI: 1.2-14.1) and allergy (OR:

1  
2  
3 60 5.1; 95% CI: 1.2-21.2) increased with exclusive use of powder-free latex gloves. A dose –response  
4  
5 61 relationship was observed for powdered latex gloves (OR: 1.1; 95% CI: 1.0-1.2). Atopy (OR: 1.5; 95%  
6  
7 62 CI: 0.7-3.3 and OR: 1.4; 95% CI: 0.6-3.2) and fruit allergy (OR: 2.3; 95% CI: 0.8-6.7 and OR: 3.1; 95%  
8  
9 63 CI: 1.1-9.2) also increased the risk of latex sensitisation and allergy.  
10  
11

## 12 13 64 **Conclusion**

14  
15  
16 65 This study adds to previous findings that healthcare workers exposed to hypoallergenic latex gloves are at  
17  
18 66 risk for developing latex sensitisation highlighting its importance as an occupational hazard in healthcare.  
19  
20 67 More research is needed to identify the most cost effective way of implementing a latex free environment  
21  
22 68 in resource limited countries, such as South Africa. In addition more cohort analysis is required to better  
23  
24 69 understand the chronicity of illness and disability associated with latex allergy.  
25  
26  
27  
28 70

## 71 INTRODUCTION

72 Latex allergy (LA) as an occupational disease among healthcare workers (HCWs) gained  
73 recognition after Nutter published a case report of contact urticaria in a HCW in 1979.<sup>1</sup> The  
74 increase in prevalence coincided with the emergence of the Human Immunodeficiency Virus/  
75 Acquired immunodeficiency syndrome (HIV/AIDS) epidemic and the introduction of “universal  
76 precautions” in the healthcare industry which had resulted in the increased use of latex gloves  
77 among HCWs.<sup>2</sup>

78 Latex gloves are preferred due to their superior barrier and physical properties as compared to  
79 the non-latex gloves.<sup>3</sup> International epidemiological studies have reported the prevalence of latex  
80 allergy among HCWs to range between 2-22% depending on the population and diagnostic  
81 methods used.<sup>4-11</sup> The prevalence in the general population has been reported to range between  
82 1-6%.<sup>12, 13</sup> In South Africa studies amongst HCWs reported a latex sensitisation prevalence of  
83 between 2.7 to 20.8%.<sup>14-16</sup> Latex allergy in HCWs is a compensable disease in South Africa in  
84 terms of the Compensation of Occupational Injuries and Diseases Act No. 130 of 1993.<sup>17</sup>

85 Powdered latex gloves were identified as an important risk factor for latex sensitisation and  
86 allergy in HCWs as they were found to contain high allergenic protein content.<sup>18</sup> Following these  
87 findings, hypoallergenic gloves with low allergen content namely, low powdered and powder  
88 free latex gloves were introduced. The European definition of powder free gloves is gloves with  
89 powder content not exceeding 2 mg per glove and leachable latex protein which is as low as is  
90 reasonably practical.<sup>19</sup>

91 Hypoallergenic gloves have been associated with reduced latex aeroallergen concentrations,  
92 reduced conversion rates and a subsequent decrease in clinic visits, and compensation claims for



1  
2  
3 93 latex induced occupational asthma and allergic contact dermatitis among HCWs.<sup>18, 20</sup> As much as  
4  
5 94 the use of low or powder free gloves has been shown to reduce latex related symptoms, other  
6  
7  
8 95 studies have shown that exposed HCWs still exhibit symptoms at very low levels of measureable  
9  
10 96 airborne latex allergens.<sup>21</sup> Most studies have reported on the airborne levels and inhalational  
11  
12 97 route of exposure hence the recommendation on low powdered or powder free latex gloves.  
13  
14  
15 98 There is little consideration given to the dermal route of exposure despite the fact that exposure  
16  
17 99 is as a result of direct contact in these instances.<sup>22</sup> Eliminating the cornstarch powder only  
18  
19  
20 100 removed the carrier and not the source of allergen which is in the latex itself. Therefore workers  
21  
22 101 using powder free gloves are still exposed to the allergenic content of latex gloves. It has been  
23  
24 102 shown that different brands from different suppliers contain differing levels of protein due to a  
25  
26  
27 103 lack of standards in latex glove manufacture.<sup>23</sup> A South African study reported that some powder  
28  
29 104 free latex gloves were found to have high allergenic protein content.<sup>23</sup> HCWs using these gloves  
30  
31 105 are exposed via direct dermal contact and are at risk for developing latex sensitization which  
32  
33  
34 106 maybe asymptomatic and if exposure continues they can later develop latex allergy which  
35  
36 107 presents with clinical manifestations.  
37  
38  
39  
40 108 While it is important to diagnose and manage an individual worker with latex allergy in the early  
41  
42 109 stages of the disease, complete control of hazardous substance in the workplace is equally if not  
43  
44 110 more important. While a latex free work environment would be a preferred control strategy,  
45  
46  
47 111 substitution of powdered latex gloves with powder free gloves was shown to be cost effective  
48  
49 112 and associated with improved clinical outcome.<sup>20, 24-26</sup> As a result this was adopted as the most  
50  
51 113 reasonable and practical approach in addressing the problem of latex allergy among HCWs both  
52  
53  
54 114 internationally and to some extent nationally.<sup>27-29</sup> This has proven to reduce latex induced  
55  
56 115 clinical outcomes. Even with this intervention, studies in Western countries such as Germany  
57  
58  
59  
60

1  
2  
3 116 and the UK have shown that the risk of latex sensitisation still exists and more needs to be done  
4  
5 117 to protect HCWs.<sup>30, 31</sup>  
6  
7

8  
9 118 The current study described the prevalence of latex sensitisation and allergy among healthcare  
10  
11 119 workers who use hypoallergenic powder free and lightly powdered latex gloves.  
12  
13

## 14 15 120 **METHODS**

### 16 17 18 121 **Study design and population** 19

20  
21  
22 122 This was a cross sectional study conducted between July 2011 and January 2012. The study  
23  
24 123 location was King Edward VIII hospital, the second largest hospital in the Southern hemisphere,  
25  
26 124 providing regional and tertiary services to the whole of KwaZulu-Natal (KZN) and the Eastern  
27  
28 125 Cape Province in South Africa. It has a bed status of 1300 and has a workforce of 2400. The  
29  
30 126 hospital was chosen due to the large workforce with different departments, and the policy of  
31  
32 127 using both powder free and low powdered latex gloves for approximately 10 years.  
33  
34  
35

36  
37 128 The study population was limited to HCWs currently employed at King Edward VIII Hospital  
38  
39 129 for more than 12 months. HCWs were defined as all personnel employed in the hospital.  
40  
41

42  
43 130 The prevalence of latex sensitization in HCWs using powdered latex gloves in the Western Cape  
44  
45 131 Province was 11.9% in 2001.<sup>16</sup> We expected the prevalence at King Edward VIII hospital to be  
46  
47 132 less than the 11.9% observed in the Western Cape Province due to the adoption of a  
48  
49 133 hypoallergenic latex glove policy in 2001. Using EPI Info calculator version 3.04.04., it was  
50  
51 134 assumed that 50% of sensitised workers have remained sensitised despite the introduction of  
52  
53 135 hypoallergenic latex gloves 10 years prior. Using an expected latex sensitization prevalence of  
54  
55 136 6% for the exposed group and the prevalence among the general population being reported as  
56  
57  
58  
59  
60

1  
2  
3 137 less than 1% the required sample size was calculated to be 585 participants 2 exposed  
4  
5  
6 138 participants for every 1 non-exposed participant (exposed =390; unexposed =195). HCWs were  
7  
8 139 considered to be exposed if they were likely to use gloves. Unexposed HCWs were drawn from  
9  
10  
11 140 the administrative staff of the hospital.

## 141 **Questionnaire**

142 We used an adaptation of the questionnaire used in an epidemiological study conducted at  
143 Groote Schuur in 2001<sup>16</sup> with permission from Professor Paul Potter, Allergology Unit, Medical  
144 School, University of Cape Town. The questionnaire containing open and closed ended questions  
145 was adapted to include items on exposure assessment. The questionnaire was administered by a  
146 trained research assistant immediately prior to the skin prick test. The questionnaire collected  
147 data on the participants' demographics, personal risk factors, latex exposure assessment, clinical  
148 manifestations of latex sensitization (dermal and respiratory) and history of previous reactions  
149 suggestive of latex allergy.

## 150 **Exposure Assessment**

### 151 *Individual Exposure*

152 Individual latex exposure was determined by the type of gloves used, number of gloves used per  
153 day, and duration of glove use. The information was limited to 7 working shifts/days prior to the  
154 interview.

### 155 *Departmental Exposure*

1  
2  
3 156 Departmental exposure was defined as glove usage in the past 12 months (01 January 2011-31  
4  
5  
6 157 December 2011). The overall departmental exposure was obtained by reviewing monthly glove  
7  
8 158 usage by each department from the stock room register. This was used to estimate the annual  
9  
10 159 exposure for employees who had rotated through different departments in the past 12 months.  
11  
12 160 Non sterile latex gloves are distributed throughout the clinical departments while a high  
13  
14 161 proportion of sterile gloves are distributed to labour ward, theatre, surgical wards and outpatient  
15  
16 162 departments. Glove type was defined as powdered and powder-free and latex free based on the  
17  
18 163 previous literature.<sup>23, 32</sup>  
19  
20  
21  
22

### 23 164 **Skin prick test (SPT)**

24  
25  
26 165 The SPT was conducted using the Stallergenes kit.<sup>32</sup> It was performed in a room with access to  
27  
28 166 emergency resuscitation services by a trained research assistant. The research assistant and  
29  
30 167 principal investigator were trained on 2 separate occasions. The test was performed on the inner  
31  
32 168 aspect of the participants' forearms, between the wrist and the elbow on normal skin. A positive  
33  
34 169 and negative control were performed using histamine (0.61% concentration of phenol) and  
35  
36 170 buffered normal saline solution respectively on the same arm and they were 3 cm apart to  
37  
38 171 prevent cross contamination. The protein concentration of the latex extract was 500µg/ml and the  
39  
40 172 solution was applied as it was with no further dilutions. After 15-20 minutes subsequent to  
41  
42 173 puncturing the skin, the SPT reaction wheal and flare was outlined by a black ink and clear tape  
43  
44 174 was used to transfer the outline from skin to the results sheet by the trained research assistant or  
45  
46 175 principal investigator.<sup>33</sup> A positive result was indicated by a mean wheal diameter measuring 3  
47  
48 176 mm or greater than the negative control. Results were recorded on a standardized result sheet.  
49  
50 177 The research assistant's test performance was audited by the principal investigator at regular  
51  
52 178 intervals to ensure correctness of technique and interpretation of the results.  
53  
54  
55  
56  
57  
58  
59  
60

1  
2  
3 179 Informed signed consent was obtained from all the participants prior to participation. They had  
4  
5  
6 180 the option of participating in the questionnaire interview and the SPT or refusing the SPT. The  
7  
8 181 study protocol was approved by the Biomedical Research Ethics Committee of the University of  
9  
10 182 KwaZulu-Natal (BE048/11). Permission to conduct the study was also obtained from the KZN  
11  
12  
13 183 Provincial Department of Health and King Edward VIII hospital management.

#### 14 15 16 184 **Statistical analysis**

17  
18  
19 185 Data was captured in Excel and analysed in Stata Version 11. Frequencies and medians with  
20  
21  
22 186 ranges were presented for categorical and continuous variables respectively. The Chi-square and  
23  
24 187 the Kruskal-Wallis test were used to test for significant associations between categorical and  
25  
26  
27 188 continuous variables and the dependent variables under study on bivariate analysis, respectively.  
28  
29  
30 189 Binary logistic regression was used to test for significant associations between independent and  
31  
32 190 dependent variables on multivariate analysis. The dependent variables used in the regression  
33  
34  
35 191 analysis were: Latex sensitisation, which was defined as having a SPT wheal of  $\geq 3$ mm to latex  
36  
37 192 extract; Latex allergy (LA) was defined as being SPT positive and a report of having any one or  
38  
39 193 more of the listed work related clinical symptoms namely itchy eyes, red eyes, runny eyes, runny  
40  
41  
42 194 nose, itchy nose, sneezing, coughing, tight chest, wheezing, itchy skin, skin rash or dizziness.  
43  
44 195 Independent variables that were considered for analysis were as follows: Age (yrs.) and sex,  
45  
46 196 duration of employment, job title, current department employed in, type of gloves used, number  
47  
48 197 of pairs of gloves used per day, self reported and family history of atopy, food allergy and  
49  
50  
51 198 previous history of open surgery and number of surgical procedures. In the multivariate analysis,  
52  
53  
54 199 age was omitted due to collinearity with duration of employment. Departmental glove  
55  
56 200 consumption was omitted as this only indicated annual distribution of gloves per department and  
57  
58  
59  
60

1  
2  
3 201 not necessarily employees' exposure since enrolled nursing assistants and enrolled nurses are  
4  
5  
6 202 rotated through different departments in any given year. The number of pair of gloves was used  
7  
8 203 as an indicator of individual latex glove exposure. The variable number of pairs of gloves used  
9  
10 204 and duration of employment were retained as continuous variables in the multivariate model.  
11  
12 205 Fractional polynomial and a fractional plot was used to visualise the dose-response relationship  
13  
14 206 of these continuous exposure variables.  
15  
16  
17  
18

## 19 207 **RESULTS**

### 22 208 **Participant Demographics**

23  
24  
25 209 Sixty five HCWs refused to participate in the study. Among the 520 HCWs who responded to  
26  
27 210 the invitation there was an overall participation rate of 85.5 % (n=501) with 3.6% (n=19)  
28  
29 211 refusing SPT. There was no significant difference between those refusing SPT and those who  
30  
31 212 had the SPT with respect to latex exposure status, age, sex and duration of employment.  
32  
33  
34  
35

36 213 The median age of participants was 42.2 years (range: 22 years-65 years) with the greater  
37  
38 214 proportion of them being females. The median duration of employment was 10.9 years (range: 1  
39  
40 215 year-42 years) with the majority of exposed participants having worked as a HCW for < 10  
41  
42 216 years. Most unexposed healthcare workers had been employed for > 20 years. Personal and  
43  
44 217 family history of allergy was more prevalent among unexposed HCWs while exposed HCWS  
45  
46 218 reported a higher prevalence of a fruit allergy and history of previous surgery (Table 1).  
47  
48  
49  
50

### 51 219 **Prevalence of Latex Sensitisation and Allergy**

52  
53  
54 220 The overall prevalence of latex sensitisation and latex allergy were 5.9% (n=29) and 4.6%  
55  
56 221 (n=23) respectively. Although the difference was not significant, the prevalence of latex  
57  
58  
59  
60

1  
2  
3 222 sensitisation was higher among the exposed group (7.1%) as compared to the unexposed group  
4  
5  
6 223 (3.1%). Latex allergy was significantly higher in the exposed group than unexposed group (5.9%  
7  
8 224 vs 1.8%,  $p=0.04$ ). There was a significant difference in the work related allergy symptoms  
9  
10 225 between exposed and unexposed workers (40.9% vs. 31.7%,  $p=0.04$ ) (Table 1). Symptoms that  
11  
12 226 were significantly associated with latex sensitisation were skin rash ( $p< 0.000$ ), itchy skin  
13  
14  
15 227 ( $p=0.001$ ), runny nose ( $p=0.004$ ), red eyes ( $p=0.01$ ) and itchy eyes ( $p=0.01$ ).  
16  
17

18 228 The prevalence of latex sensitization was higher among those who were exposed and those with  
19  
20 229 employment duration of < 10yrs. Although the prevalence of latex sensitisation was lower  
21  
22 230 among participants < 30 years of age, there was no significant variation with age or sex. There  
23  
24 231 was a significant difference ( $p=0.04$ ) in the prevalence of fruit allergy between those participants  
25  
26 232 with latex sensitisation (17.2%) and unsensitised participants (6.9%) The exclusive use of  
27  
28 233 powder free latex gloves was found to be significantly ( $p=0.003$ ) higher among the participants  
29  
30 234 who had latex sensitisation. There was equal distribution of powdered and powder free latex  
31  
32 235 gloves among those who reported the use of mixed gloves. The prevalence of reporting previous  
33  
34 236 open surgery and use of other non- occupational exposure latex containing material did not vary  
35  
36 237 significantly between those who had latex sensitisation and those who were unsensitised. There  
37  
38 238 was a significantly higher prevalence of reporting allergic reactions when handling other latex  
39  
40 239 containing medical equipment among participants with latex allergy as compared to unsensitised  
41  
42 240 participants (10.3% vs 1.7%,  $p=0.002$ ) (Table 2).  
43  
44  
45  
46  
47  
48  
49

50 241 **Crude association of demographics, exposure status, medical and personal history and latex**  
51  
52 242 **sensitisation, latex allergy**  
53  
54  
55  
56  
57  
58  
59  
60

1  
2  
3 243 Latex exposure was significantly associated with latex allergy (OR: 3.4; 95% CI: 1.1-10.8).  
4  
5  
6 244 Working as a HCW for 5-9 years was significantly associated with latex sensitisation (OR: 2.6;  
7  
8 245 95% CI: 1.2-5.5) and latex allergy (OR: 3.3; 95% CI: 1.4-7.6), respectively. Employment  
9  
10 246 duration as a HCW for >20 years was protective against latex allergy (OR: 0.2; 95% CI: 0.0-0.8).  
11  
12 247 In comparison with unexposed workers, working as an enrolled nurse was significantly  
13  
14 248 associated with both latex sensitisation (OR: 2.5; 95% CI: 1.2-5.3) and latex allergy (OR: 2.4;  
15  
16 249 95% CI: 1.1-5.6). The exclusive use of powder free latex gloves was significantly associated  
17  
18 250 with latex sensitisation (OR: 3.1; 95% CI: 1.4-6.8) and latex allergy (OR: 3.1; 95% CI: 1.7-9.1).  
19  
20 251 Powdered and powder free latex gloves were equally distributed among those who reported the  
21  
22 252 use of mixed gloves. The annual consumption of pairs of gloves per HCW by department was  
23  
24 253 ranked and grouped into tertiles. Although medical and surgical wards had low and moderate  
25  
26 254 pairs of gloves consumption per HCW, these wards had the highest proportion of workers with  
27  
28 255 latex sensitisation (n=6, 20.0% each). However the relation was only significant for those who  
29  
30 256 reported the medical ward as being the current department in which they worked (p=0.01). The  
31  
32 257 proportions for powdered latex glove use were 71% and 69% in medical and surgical wards,  
33  
34 258 respectively and this was not statistically significant. Exposure to other latex containing medical  
35  
36 259 devices was not significantly different from what was reported in other wards. There was no  
37  
38 260 significant association between reported personal history of allergy disease, latex sensitisation  
39  
40 261 and latex allergy. Fruit allergy was significantly associated with latex allergy (OR: 3.7; 95%:  
41  
42 262 1.4-10.4) (Table 3). Listed fruits were evaluated for their independent association with latex  
43  
44 263 sensitisation. Avocado (OR: 12.3; 95% CI: 5.1-29.6) and others (OR: 5.1; 95% CI: 2.1-11.8)  
45  
46 264 which included pineapple and orange showed significant associations with latex sensitisation  
47  
48  
49  
50  
51  
52  
53  
54  
55 265 (data not shown).  
56  
57  
58  
59  
60



## 266 **Multivariate analysis**

267 While latex exposure had estimates of the OR above 2, there was no significant association with  
268 latex sensitisation and latex allergy. Duration of employment was found to be inversely  
269 associated with latex allergy in models I and II. The exclusive use of powder free latex gloves  
270 was significantly associated with latex sensitisation (OR: 4.2; 95% CI: 1.2-14.1) and latex  
271 allergy (OR: 5.1; 95%CI: 1.2-21.2) on multivariate analysis. This significant association  
272 disappeared when examining the number of pairs of powder free gloves used in the last 7 days. A  
273 weak association was observed for the number of pairs of powdered latex gloves used in the last  
274 7 days with both latex sensitisation and latex allergy (model III and IV). Further analysis of  
275 duration of employment and number of pairs of gloves using fractional polynomial failed to  
276 demonstrate a dose-response relationship with either latex sensitisation or latex allergy. There  
277 was a significant association between fruit allergy and latex allergy in model I (OR: 3.1; 95% CI:  
278 1.1-9.2) (Table 4).

## 279 **DISCUSSION**

280 This is an important study for South African HCWs as it examined the risk of latex sensitisation  
281 in a group of workers exposed to hypoallergenic latex gloves. As previously mentioned there has  
282 been no literature documenting the prevalence of latex sensitisation among South African HCWs  
283 using hypoallergenic lightly powdered or powder-free latex gloves. The prevalence of latex  
284 sensitisation among exposed HCWs (7.1%) in this study is comparable to findings among HCWs  
285 in another South African hospital.<sup>14</sup> However it was considerably lower than the 11.9%  
286 prevalence reported by Potter in the same year.<sup>16</sup> While a substantial number of participants  
287 (37%) reported work related allergy symptoms, only 4.6% met our definition of latex allergy.  
288 The important symptoms associated with latex sensitisation were skin rash, itchy skin, runny

1  
2  
3 289 nose, red and itchy eyes in keeping with previous studies. Elimination of powdered latex gloves  
4  
5  
6 290 has shown a reduction in the concentration of aeroallergens in the operating room with the low  
7  
8 291 prevalence of latex allergy in our study population.  
9

10  
11 292 Although the relationship was weak, this study showed that the risk of latex sensitisation  
12  
13  
14 293 decreases with duration of employment. The healthy worker effect is a possible explanation of  
15  
16 294 this finding. Prior to availability of hypoallergenic latex gloves, workers who had developed  
17  
18 295 latex allergy may have left employment or they may have changed their career path and moved  
19  
20  
21 296 into a more administrative or managerial role with no contact with latex gloves. Furthermore  
22  
23 297 new employees are only sensitised and have not yet manifested clinical symptoms and they  
24  
25 298 continue using latex gloves. On the other hand senior HCWs may have been sensitised during  
26  
27  
28 299 their earlier years of employment and as a result they either moved to departments with less  
29  
30 300 exposure to latex gloves or deliberately avoid latex containing products and therefore exhibit less  
31  
32  
33 301 latex related symptoms. Moreover, the introduction of hypoallergenic gloves 10 years prior to  
34  
35 302 the study may explain the reduced sensitisation in senior HCWs as demonstrated in the study by  
36  
37 303 Smith et al in 2007. The published literature has been inconsistent in reporting the association  
38  
39 304 between duration of employment and latex sensitisation. Although latex is one of the best studied  
40  
41  
42 305 allergens, no exposure response studies have been published with measured latex allergen levels.  
43  
44 306 In addition, studies have demonstrated variation in allergen content of different gloves. These  
45  
46  
47 307 may lead to discrepancies in the literature with regard to the role of duration of employment as a  
48  
49 308 surrogate measure of exposure.  
50

51  
52  
53 309 In our study HCWs who exclusively used powdered free latex gloves had a 4 times greater odds  
54  
55 310 of developing latex sensitisation. The fact that HCWs with latex sensitisation or allergy work  
56  
57 311 more often with powder free latex gloves is indicative of reverse causality because of symptoms.  
58  
59  
60

1  
2  
3 312 Moreover the background prevalence of latex sensitisation in this study was relatively higher  
4  
5 313 (3.5%) than previously reported prevalence in the general population by Bousquet et al.<sup>13</sup> Studies  
6  
7  
8 314 have shown that some of these “hypoallergenic” latex gloves actually contain high levels of  
9  
10 315 allergens which can be release into the environment with aggressive manipulation.<sup>23</sup> Some of the  
11  
12 316 sensitised HCWs may have been sensitised before the hospital implemented a hypoallergenic  
13  
14 317 latex glove policy. Also Smith et al showed that complete avoidance of powdered latex glove can  
15  
16 318 result in the reduction or no change in measurable IgE antibodies.<sup>34</sup> A study in Germany reported  
17  
18 319 a high prevalence of 8% among 226 dental students who had only been exposed to exclusive  
19  
20 320 powder free latex gloves.<sup>30</sup> Similarly in the UK despite a total ban on powdered latex gloves  
21  
22 321 Clayton found a 10% prevalence of latex sensitisation in HCWs.<sup>31</sup> It is also not clear to what  
23  
24 322 extent the aeroallergens released by colleagues using powdered latex gloves influence this  
25  
26 323 finding. Furthermore the role of other latex containing medical devices during sensitisation  
27  
28 324 period cannot be entirely ruled out.  
29  
30  
31  
32  
33  
34

35 325 In our study, frequency of exposure as measured by the number of gloves used in the last 7  
36  
37 326 working days showed a weak association between powdered latex gloves and latex sensitisation  
38  
39 327 but no association could be demonstrated with powder free latex gloves. Airborne latex  
40  
41 328 aeroallergens have been shown to increase with the number of powdered gloves used which  
42  
43 329 subsequently increases the risk of latex sensitisation and clinical latex glove related allergy  
44  
45 330 symptoms.<sup>18</sup>  
46  
47  
48  
49

50 331 The positive association between department with low glove consumption per HCW and latex  
51  
52 332 sensitisation is in contrast with previous finding by Liss and co-workers.<sup>9</sup> They reported positive  
53  
54 333 association with departments that had high glove consumption per HCWs. Again, this could be  
55  
56 334 as a result of reverse causality where HCWs with latex sensitisation may have been relocated to  
57  
58  
59  
60

1  
2  
3 335 wards with low glove consumption to minimise the exposure. In addition, the annual pair of  
4  
5  
6 336 gloves consumption per HCW by department does not provide an accurate indication of  
7  
8 337 individual exposure; rather it gives us the annual distribution of gloves to different departments.  
9

10  
11 338 Several studies have reported atopy as a significant risk factor for latex sensitisation.<sup>9, 10, 35</sup>

12  
13 339 Similarly, the prevalence of reporting a history of personal atopy in this study was higher among  
14  
15  
16 340 latex sensitised participants although the association was not statistically significant. The role of  
17  
18 341 atopy is complex because some individuals might also have become atopic after having been  
19  
20  
21 342 latex sensitised and cross sectional study is not suitable in establishing this association.  
22

23  
24 343 Fruit latex allergy syndrome is a phenomenon seen where latex sensitised individuals  
25  
26 344 demonstrate a cross reactivity with specific foods; particularly fruit. Studies have identified this  
27  
28  
29 345 phenomenon among sensitised HCWs and the general population. This has been attributed to the  
30  
31 346 similarity between fruit proteins and latex allergens.<sup>36</sup> Fruit allergy was significantly associated  
32  
33  
34 347 with latex sensitisation and latex allergy in our study. Our study was dependent on the self-  
35  
36 348 reporting of fruit allergy and no objective tests were carried out. It is therefore possible that  
37  
38  
39 349 participants have independent simultaneous allergies to both fruit and latex without cross  
40  
41 350 reactivity. Also, we were unable to determine whether latex sensitisation preceded the  
42  
43 351 development of fruit allergy or vice versa. Fruit allergy prior to latex exposure could have  
44  
45  
46 352 contributed to the association observed in our study.  
47

48  
49 353 Latex sensitised participants reported a high prevalence of a history of previous open surgery in  
50  
51 354 our study. This has been reported to occur as a result of direct intraoperative exposure to latex  
52  
53  
54 355 containing medical devices such as catheters or tubes. Studies in children with congenital  
55  
56 356 abnormalities have demonstrated that the risk for latex allergy increases with the number of open  
57  
58  
59  
60

1  
2  
3 357 surgical procedures that they undergo.<sup>37</sup> Frequency of invasive procedures among adults was  
4  
5  
6 358 shown to increase the risk of latex sensitisation reporting while more than 10 procedures  
7  
8 359 increased the risk of developing latex allergy.<sup>38</sup>  
9

10  
11 360 Strengths of this study include the high response rate (85.5%) and comparability to other  
12  
13 361 studies.<sup>8, 16</sup> Access to the hospital employee database allowed us to better assess the  
14  
15 362 representativeness of this study population by comparing demographic data of the non-  
16  
17 363 participants and the participants. The participants were randomly selected minimising the  
18  
19 364 potential of participant's bias that comes with a volunteer approach.  
20  
21  
22  
23

24 365 The presence of a control group provided a background prevalence of latex sensitisation in this  
25  
26 366 population which allowed for a better estimation of associations attributable to work related  
27  
28 367 factors. The use of Stallergenes latex specific SPT further strengthens the study. The SPT test is  
29  
30 368 regarded as the gold standard for the diagnosis of latex allergy and Stallergenes has been shown  
31  
32 369 to have a diagnostic sensitivity and specificity of 93% and 100%, respectively.<sup>32</sup> The research  
33  
34 370 assistant employed on this study was trained and initially shadowed and periodically supervised  
35  
36 371 by the principal investigator to ensure appropriate administration of the questionnaire and the  
37  
38 372 SPT thereby improving the reliability and validity of the study.  
39  
40  
41  
42  
43

44 373 This study was limited by the cross sectional study design which was relatively low in cost and  
45  
46 374 quick to conduct. It only allowed for the determination of prevalence of latex sensitisation at one  
47  
48 375 point in time. Consequently the prevalence of latex sensitisation may have been underestimated  
49  
50 376 as it is possible that HCWs who had already developed latex sensitisation have left the hospital  
51  
52 377 before the study was conducted. Some of the observed associations in the study may be as a  
53  
54 378 result of a complex interplay between the healthy worker effect, reverse causality and exposure  
55  
56  
57  
58  
59  
60

1  
2  
3 379 reduction by the introduction of powder free latex gloves. These interactions can be better  
4  
5  
6 380 explored and understood in a longitudinal study. Recall bias is another potential limitation in this  
7  
8 381 study as workers were asked to recall the number of gloves used in the past 7 working days.  
9  
10 382 HCWs may have overestimated or underestimated their individual exposures. Our study  
11  
12 383 depended on self-reporting of personal and family atopic disorders and this may have resulted in  
13  
14 384 the misclassification of atopy. The role of atopy and cross-reactivity between allergens is a  
15  
16 385 complex phenomenon which cannot be investigated in cross sectional study. Therefore, cohort  
17  
18 386 studies are necessary to disentangle this phenomenon.  
19  
20  
21  
22

## 23 387 **CONCLUSION**

24  
25  
26 388 This study shows that even in the presence of powder free hypoallergenic glove use there is latex  
27  
28 389 sensitisation and latex allergy, adding to previous findings that HCWs exposed to hypoallergenic  
29  
30 390 latex gloves are still at risk for developing latex sensitisation and latex allergy. This indicates that  
31  
32 391 latex sensitisation and allergy are still an important occupational hazard for HCWs. While it may  
33  
34 392 be economically impractical to replace the latex gloves in our setting, reduction of allergen  
35  
36 393 content in latex products is another strategy that can be implemented to address the problem and  
37  
38 394 protect HCWs. A policy accompanied by clear implementation plans as well as sustainable  
39  
40 395 education and training programmes to address latex sensitisation and allergy among HCWs  
41  
42 396 should be implemented.<sup>39</sup> In addition HCWs must be continuously monitored for the  
43  
44 397 development of latex sensitisation and alternate latex free glove must be made available for  
45  
46 398 them. More research is needed to identify the most cost effective way of implementing a latex  
47  
48 399 free environment in resource limited countries, such as South Africa. In addition the current  
49  
50 400 studies in South Africa have largely been cross-sectional in nature. More cohort analysis is  
51  
52 401 required to better understand the chronicity of illness and disability associated with latex allergy.  
53  
54  
55  
56  
57  
58  
59  
60

1  
2  
3 402 **ACKNOWLEDGEMENT**  
4  
5

6 403 I would like to thank the hospital employees participating in this study and their management for  
7  
8 404 allowing me access to the human resource database. I would like to thank Professor Mohamed  
9  
10 405 Jeebhay (Centre of Occupational and Environmental Health, University of Cape Town, SA) and  
11  
12 406 Professor David L Nordstrom (Occupational and Environmental Safety and Health, University of  
13  
14 407 Wisconsin-Whitewater, USA) for their comments on my initial proposal. I would like to thank  
15  
16 408 Professor Rajen Naidoo (Discipline of Occupational and Environmental Health, UKZN, SA) for  
17  
18 409 his statistical advice during the data analysis. In addition thank you to Mr. Nhlanhla Jwara for  
19  
20 410 conducting the field work.  
21  
22  
23  
24  
25

26 411 **Contributorship**  
27  
28

29 412 Dr Shumani Phaswana is the principal investigator who was involved from the conception of the idea,  
30  
31 413 proposal writing, data collection, data management and interpretation of the results.  
32  
33

34 414 Dr Saloshni Naidoo contributed to the conception and design of the study, analysis and interpretation of  
35  
36 415 the data, critical review of the intellectual content of the article and final approval of the article.  
37  
38

39 416 **Data sharing**  
40  
41

42 417 No additional unpublished data  
43  
44

45 418 **Funding**  
46  
47

48 419 None  
49  
50

51 420 **Competing interests**  
52  
53

54 421 None  
55  
56  
57  
58  
59 422



## 423 REFERENCES

- 424 1. Nutter AF. Contact urticaria to rubber. *The Bri J Dermatol*. 1979; 101: 597-8.
- 425 2. Centers for Disease Control. Recommendations for prevention of HIV transmission in health-  
426 care settings. *MMWR Morb and Mort Wkly Rep*. 1987; 36 Suppl 2: 1S-18S.
- 427 3. Rego A, Roley L. In-use barrier integrity of gloves: latex and nitrile superior to vinyl. *Am J Infect*  
428 *Control*. 1999; 27: 405-10.
- 429 4. Leung R, Ho A, Chan J, et.al. Prevalence of latex allergy in hospital staff in Hong Kong. *Clin Exp*  
430 *Allergy* 1997; 27: 167-74.
- 431 5. Chaiear N, Jindawong B, Boonsawas W, et.al. Glove allergy and sensitization to natural rubber  
432 latex among nursing staff at Srinagarind Hospital, Khon Kaen, Thailand. *J Med Assoc Thailand*. 2006; 89:  
433 368-76.
- 434 6. Wan KS, Lue HC. Latex allergy in health care workers in Taiwan: prevalence, clinical features. *Int*  
435 *Arch Occup Environ Health*. 2007; 80: 455-7.
- 436 7. Douglas R, Morton J, Czarny D, et.al. Prevalence of IgE-mediated allergy to latex in hospital  
437 nursing staff. *Aust N Z J Med*. 1997; 27: 165-9.
- 438 8. Grzybowski M, Ownby DR, Peyser PA, et.al. The prevalence of anti-latex IgE antibodies among  
439 registered nurses. *J Allergy Clin Immunol*. 1996; 98: 535-44.
- 440 9. Liss GM, Sussman GL, Deal K, et al. Latex allergy: epidemiological study of 1351 hospital workers.  
441 *Occup Environ Med*. 1997; 54: 335-42.
- 442 10. Watts DN, Jacobs RR, Forrester B, et.al. An evaluation of the prevalence of latex sensitivity  
443 among atopic and non-atopic intensive care workers. *Am J Ind Med*. 1998; 34: 359-63.
- 444 11. Verna N, Di Giampaolo L, Renzetti A, et al. Prevalence and risk factors for latex-related diseases  
445 among healthcare workers in an Italian general hospital. *Ann Clin Lab Sci*. 2003; 33: 184-91.
- 446 12. Porri F, Lemiere C, Birnbaum J, et al. Prevalence of latex sensitization in subjects attending  
447 health screening: implications for a perioperative screening. *Clin Exp Allergy* . 1997; 27: 413-7.
- 448 13. Bousquet J, Flahault A, Vandenplas O, et al. Natural rubber latex allergy among health care  
449 workers: a systematic review of the evidence. *J Allergy Clin Immunol*. 2006; 118: 447-54.
- 450 14. Brathwaite N, Motala C, Toerien A, et.al. Latex allergy--the Red Cross Children's Hospital  
451 experience. *S Afr med J*. 2001; 91: 750-1.
- 452 15. de Beers C, Cilliers J. Accurate diagnosis of latex allergy in hospital employees is cost-effective.  
453 *Curr Allergy Clin Immunol*. 2004; 91: 760-5.
- 454 16. Potter PC, Crombie I, Marian A, et.al. Latex allergy at Groote Schuur Hospital--prevalence,  
455 clinical features and outcome. *S Afri Med J*. 2001; 91: 760-5.
- 456 17. Department of Labour. Compensation of Occupational and Diseases Act no 130. South Africa:  
457 Pretoria, 1993.
- 458 18. Allmers H, Brehler R, Chen Z, et.al. Reduction of latex aeroallergens and latex-specific IgE  
459 antibodies in sensitized workers after removal of powdered natural rubber latex gloves in a hospital. *J*  
460 *Allergy Clin Immunol* . 1998; 102: 841-6.
- 461 19. Wrangsjö K, Boman A, Liden C, et.al. Primary prevention of latex allergy in healthcare--spectrum  
462 of strategies including the European glove standardization. *Contact dermatitis*. 2012; 66: 165-71.
- 463 20. Malerich PG, Wilson ML, Mowad CM. The effect of a transition to powder-free latex gloves on  
464 workers' compensation claims for latex-related illness. *Dermatitis*. 2008; 19: 316-8.
- 465 21. Baur X, Chen Z, Allmers H. Can a threshold limit value for natural rubber latex airborne allergens  
466 be defined? *J Allergy Clin Immunol*. 1998; 101: 24-7.
- 467 22. Hayes BB, Afshari A, Millecchia L, et.al. Evaluation of percutaneous penetration of natural  
468 rubber latex proteins. *Toxicol Sci* 2000; 56: 262-70.



- 1  
2  
3 469 23. Mabe DO, Singh TS, Bello B, et.al. Allergenicity of latex rubber products used in South African  
4 470 dental schools. *S Afri Med J* 2009; 99: 672-4.  
5 471 24. LaMontagne AD, Radi S, Elder DS, et.al. Primary prevention of latex related sensitisation and  
6 472 occupational asthma: a systematic review. *Occup Environ Med* 2006; 63: 359-64.  
7 473 25. Heederik D, Henneberger PK, Redlich CA. et.al.. Primary prevention: exposure reduction, skin  
8 474 exposure and respiratory protection. *Eur Respir Rev* 2012; 21: 112-24.  
9 475 26. Baur X, Sigsgaard T. The new guidelines for management of work-related asthma. *The Eur Respir*  
10 476 *J* 2012; 39: 518-9.  
11 477 27. Potter PC. Latex allergy--time to adopt a powder-free policy nationwide. *S Afri Med J* 2001; 91:  
12 478 746-8.  
13 479 28. Liss GM, Tarlo SM. Natural rubber latex-related occupational asthma: association with  
14 480 interventions and glove changes over time. *Am J Ind Med* 2001; 40: 347-53.  
15 481 29. Hunt LW, Kelkar P, Reed CE, et.al. Management of occupational allergy to natural rubber latex in  
16 482 a medical center: the importance of quantitative latex allergen measurement and objective follow-up. *J*  
17 483 *Allergy Clin Immunol* 2002; 110: S96-106.  
18 484 30. Schmid K, Christoph Broding H, Niklas D, et.al. Latex sensitization in dental students using  
19 485 powder-free gloves low in latex protein: a cross-sectional study. *Contact dermatitis* 2002; 47: 103-8.  
20 486 31. Clayton TH, Wilkinson SM. Contact dermatoses in healthcare workers: reduction in type I latex  
21 487 allergy in a UK centre. *Clin Exp Dermatol* 2005; 30: 221-5.  
22 488 32. Turjanmaa K, Palosuo T, Alenius H, et al. Latex allergy diagnosis: in vivo and in vitro  
23 489 standardization of a natural rubber latex extract. *Allergy* 1997; 52: 41-50.  
24 490 33. Morris A. ALLSA Position Statement: Allergen Skin-Prick Testing. *Curr Allergy Clin Immunol* 2006;  
25 491 90: 22-5.  
26 492 34. Smith AM, Amin HS, Biagini RE, et al. Percutaneous reactivity to natural rubber latex proteins  
27 493 persists in health-care workers following avoidance of natural rubber latex. *Clin Exp Allergy* 2007; 37:  
28 494 1349-56.  
29 495 35. Suli C, Parziale M, Lorini M, et.al. Prevalence and risk factors for latex allergy: a cross sectional  
30 496 study on health-care workers of an Italian hospital. *J Investig Allergol Clin Immunol* 2004; 14: 64-9.  
31 497 36. Blanco C. Latex-fruit syndrome. *Cur Allergy Asthma Rep* 2003; 3: 47-53.  
32 498 37. Porri F, Pradal M, Lemiere C, et al. Association between latex sensitization and repeated latex  
33 499 exposure in children. *Anesthesiology* 1997; 86: 599-602.  
34 500 38. Rueff F, Kienitz A, Schopf P, et al. Frequency of natural rubber latex allergy in adults is increased  
35 501 after multiple operative procedures. *Allergy* 2001; 56: 889-94.  
36 502 39. Brown RH, Hamilton RG, McAllister MA. How health care organizations can establish and  
37 503 conduct a program for a latex-safe environment. *Jt Comm J Qual Saf* 2003; 29: 113-23.  
38  
39  
40  
41  
42  
43  
44 504  
45  
46  
47 505  
48  
49  
50  
51  
52  
53  
54  
55  
56  
57  
58  
59  
60

506 **TABLES**507 **Table 1: Demographics and associated risk factors amongst latex exposed and unexposed**  
508 **healthcare workers at King Edward VIII Hospital, KwaZulu-Natal South Africa, (n=501)**509  
510

| Characteristic                              | Exposed<br>N (%) | Unexposed<br>N (%) |
|---------------------------------------------|------------------|--------------------|
| Number of participants                      | 337 (67.3)       | 164 (32.7)         |
| <b>Demographics</b>                         |                  |                    |
| Age (years)                                 |                  |                    |
| ≤30                                         | 30(8.9)          | 19(11.6)           |
| >30-40                                      | 121(35.9)        | 40(24.4)           |
| >40-50                                      | 101(29.9)        | 59(35.9)           |
| >50                                         | 85(25.2)         | 46(28.1)           |
| Duration of employment (years)              |                  |                    |
| ≤5                                          | 39(11.6)         | 28(17.1)           |
| >5-10**                                     | 135(40.1)        | 32(19.5)           |
| >10-15                                      | 49(14.5)         | 17(10.4)           |
| >15-20                                      | 24(7.1)          | 20(12.2)           |
| >20*                                        | 90(26.7)         | 67(40.9)           |
| Sex **                                      |                  |                    |
| Female                                      | 309(91.7)        | 95(57.9)           |
| Male                                        | 28(8.3)          | 69(42.1)           |
| Job Title (yes)                             |                  |                    |
| Administrative                              |                  | 164(100.0)         |
| Professional nurses                         | 123(36.5)        |                    |
| Enrolled nurses                             | 141(41.8)        |                    |
| Enrolled nursing assistants                 | 73 (21.7)        |                    |
| <b>Medical and Personal History</b>         |                  |                    |
| Personal history of Allergy Disease (yes)   | 147(43.6)        | 83(50.6)           |
| Family history of Allergy Disease (yes)     | 197(58.5)        | 102(62.2)          |
| Fruit allergy (yes)                         | 29(8.6)          | 9(5.5)             |
| Previous open surgery (yes)*                | 168(49.8)        | 61(37.2)           |
| Work-related allergy symptoms(yes)*         | 138(40.9)        | 52(31.7)           |
| Non-occupational latex exposure (yes)       | 161(47.8)        | 76(46.3)           |
| Latex sensitisation (yes)                   | 24(7.1)          | 5(3.1)             |
| Current latex allergy (yes)*                | 20(5.9)          | 3(1.8)             |
| <b>Chi square, *p&lt;0.05, **p&lt;0.001</b> |                  |                    |

511

512

513

514

515

**Table 2: Comparison of risk factors between latex sensitised (skin prick test positive) and non-sensitised (skin prick test negative) healthcare workers at King Edward VIII Hospital, KwaZulu-Natal South Africa (n=501)**

| Characteristics                                | Latex SPT +ve <sup>†</sup> (29)<br>N (%) | Latex SPT -ve <sup>††</sup> (472)<br>N (%) | 520<br>521<br>522 |
|------------------------------------------------|------------------------------------------|--------------------------------------------|-------------------|
| <b>Demographics</b>                            |                                          |                                            | 523               |
| Age (years.)                                   |                                          |                                            | 524               |
| ≤30                                            | 1 (3.5)                                  | 48(10.2)                                   | 525               |
| >30-40                                         | 13 (44.8)                                | 148(31.4)                                  | 526               |
| >40-50                                         | 8 (27.6)                                 | 152(32.2)                                  | 527               |
| >50                                            | 7 (24.1)                                 | 124(26.3)                                  | 528               |
| Duration of employment                         |                                          |                                            | 529               |
| ≤5                                             | 3(10.3)                                  | 64(13.6)                                   | 530               |
| >5-10                                          | 16(55.2)                                 | 151(31.9)                                  | 531               |
| >10-15                                         | 3(10.3)                                  | 63(13.4)                                   | 532               |
| >15-20                                         | 1(3.5)                                   | 43(9.1)                                    | 533               |
| >20                                            | 6(20.7)                                  | 151(31.9)                                  | 534               |
| Sex (yes)                                      |                                          |                                            | 535               |
| Male                                           | 5(17.2)                                  | 118(25.0)                                  | 536               |
| Female                                         | 24(82.8)                                 | 354(75.0)                                  | 537               |
| Job Title (yes)                                |                                          |                                            | 538               |
| Administrative                                 | 5(17.2)                                  | 159(33.7)                                  | 539               |
| Professional nurses                            | 5(17.2)                                  | 118(25.0)                                  | 540               |
| Enrolled nurses                                | 14(48.3)                                 | 127(26.9)                                  | 541               |
| Enrolled nursing assistants                    | 5(17.2)                                  | 68(14.4)                                   | 542               |
| <b>Latex Exposure</b>                          |                                          |                                            | 543               |
| Exposure status(yes)                           | 24 (82.8)                                | 313(66.3)                                  | 544               |
| Type of gloves                                 |                                          |                                            | 545               |
| None                                           | 5(17.2)                                  | 165(34.6)                                  | 546               |
| Exclusive powdered latex glove (yes)           | 2(6.9)                                   | 36(7.6)                                    | 547               |
| Exclusive powder free latex glove (yes)*       | 11(37.9)                                 | 77(16.3)                                   | 548               |
| Mixed (yes)                                    | 11(37.9)                                 | 198(41.9)                                  | 549               |
| <b>Medical and Personal History</b>            |                                          |                                            | 550               |
| Personal history of Allergy Disease (yes)      | 16(55.2)                                 | 214(45.3)                                  | 551               |
| Family history of Allergy Disease (yes)        | 18(62.1)                                 | 281(59.5)                                  | 552               |
| Fruit allergy (yes) *                          | 5(17.2)                                  | 33(6.9)                                    | 553               |
| Previous open surgery (yes)                    | 18(62.1)                                 | 211(44.7)                                  | 554               |
| Non-occupational latex exposure (yes)          | 12(41.4)                                 | 225(47.7)                                  | 555               |
| Reaction to other latex medical devices (yes)* | 3(10.3)                                  | 8(1.7)                                     | 556               |
| <b>Chi Square, *p&lt;0.05</b>                  |                                          |                                            | 557               |
| <b>†Latex Skin Prick Test Positive</b>         |                                          |                                            | 558               |
| <b>††Latex Skin Prick Test Negative</b>        |                                          |                                            | 559               |
|                                                |                                          |                                            | 560               |

561  
562  
563  
564

565 **Table 3: Crude Odds Ratios (OR) (95%CI) of demographics, exposure status, medical and personal**  
 566 **history and latex sensitisation and latex allergy amongst healthcare workers at King Edward VIII**  
 567 **Hospital, KwaZulu-Natal South Africa, (n=501)**

| Characteristics                                                                      | N=2<br>9 | Latex Sensitisation<br>OR (95%CI) | N=23 | LA#<br>OR (95%CI) | 568<br>569<br>570 |
|--------------------------------------------------------------------------------------|----------|-----------------------------------|------|-------------------|-------------------|
| <b>Demographics</b>                                                                  |          |                                   |      |                   |                   |
| Age (years)                                                                          |          |                                   |      |                   | 571               |
| ≤30                                                                                  | 1        | 0.3(0.0-1.9)                      | 1    | 0.4(0.0-2.4)      | 572               |
| >30-40                                                                               | 13       | 1.8(0.8-3.7)                      | 11   | 2.0(0.9-4.6)      | 573               |
| >40-50                                                                               | 8        | 0.8(0.4-1.8)                      | 7    | 0.9(0.4-2.2)      | 574               |
| >50                                                                                  | 7        | 0.8(0.4-2.1)                      | 4    | 0.6(0.2-1.7)      | 575               |
| Duration of employment (years)                                                       |          |                                   |      |                   | 576               |
| <5                                                                                   | 3        | 0.7(0.2-2.4)                      | 3    | 0.9(0.3-3.2)      | 577               |
| 5-10                                                                                 | 16       | 2.6(1.2-5.5)*                     | 14   | 3.3(1.4-7.6)*     | 578               |
| >10-15                                                                               | 3        | 0.7(0.2-2.4)                      | 3    | 0.9(0.3-3.2)      | 579               |
| >15-20                                                                               | 1        | 0.4(0.0-2.1)                      | 1    | 0.5(0.0-2.8)      | 580               |
| >20                                                                                  | 6        | 0.5(0.2-1.4)                      | 2    | 0.2(0.0-0.8)      | 581               |
| Sex (yes)                                                                            |          |                                   |      |                   | 582               |
| Female                                                                               | 24       | 1.6(0.6-4.1)                      | 20   | 2.2(0.7-7.2)      | 583               |
| Job Title (yes)                                                                      |          |                                   |      |                   | 584               |
| Administrative                                                                       | 5        | 0.4(0.2-1.1)                      | 3    | 0.3(0.1-0.9)*     | 585               |
| Professional nurses                                                                  | 5        | 0.6(0.2-1.6)                      | 4    | 0.6(0.2-1.8)      | 586               |
| Enrolled nurses                                                                      | 14       | 2.5(1.2-5.3)*                     | 11   | 2.4(1.1-5.6)*     | 587               |
| Enrolled nursing assistants                                                          | 5        | 1.2(0.5-3.3)                      | 5    | 1.7(0.6-4.5)      | 588               |
| <b>Latex Exposure</b>                                                                |          |                                   |      |                   |                   |
| Exposure status (yes)                                                                | 24       | 2.4(0.9-6.3)                      | 20   | 3.4(1.1-10.8)     | 589               |
| Type of gloves                                                                       |          |                                   |      |                   | 590               |
| None                                                                                 | 5        | 0.4(0.2-1.0)                      | 3    | 0.3(0.1-0.9)*     | 591               |
| Exclusive Powdered latex glove (yes)                                                 | 2        | 0.9(0.0-3.6)                      | 2    | 1.2(0.0-1.7)      | 592               |
| Exclusive Powder free latex glove (yes)                                              | 11       | 3.1(1.4-6.8)*                     | 10   | 3.1(1.7-9.1)*     | 593               |
| Mixed gloves(yes)                                                                    | 11       | 0.8(0.4-1.8)                      | 8    | 0.7(0.3-1.7)      | 594               |
| <b>Medical and Personal History</b>                                                  |          |                                   |      |                   |                   |
| Personal history of Allergy Disease (yes)                                            | 16       | 1.4(0.7-3.1)                      | 12   | 1.3(0.5-2.9)      | 595               |
| Family history of Allergy Disease (yes)                                              | 18       | 1.1(0.5-2.4)                      | 14   | 1.1(0.5-2.4)      | 596               |
| Fruit allergy (yes)                                                                  | 5        | 2.8(1.0-7.5)                      | 5    | 3.7(1.4-10.5)*    | 597               |
| Previous open surgery (yes)                                                          | 18       | 1.1(0.5-2.4)                      | 14   | 1.5(0.7-3.1)      | 598               |
| <b>Chi square, *p&lt;0.05</b>                                                        |          |                                   |      |                   |                   |
| <b>†Latex Skin Prick Test Positive</b>                                               |          |                                   |      |                   |                   |
| <b>‡Latex Skin Prick Test Positive and work related clinical symptoms of allergy</b> |          |                                   |      |                   |                   |

591

592

593

**Table 4: Multivariate analysis of demographics, medical and personal history, exposure history and latex sensitisation (LS)<sup>†</sup> and latex allergy (LA)<sup>#</sup> amongst healthcare workers at King Edward III Hospital, KwaZulu-Natal South Africa, (n=501)**

| Characteristics                                    | MODEL I* (n=501) |                  | MODEL II** (n=501) |                  | MODEL III***(n=202) |                  | MODEL IV****(n=252) |                     |
|----------------------------------------------------|------------------|------------------|--------------------|------------------|---------------------|------------------|---------------------|---------------------|
|                                                    | LS<br>OR (95%CI) | LA<br>OR (95%CI) | LS<br>OR (95%CI)   | LA<br>OR (95%CI) | LS<br>OR (95%CI)    | LA<br>OR (95%CI) | LS<br>OR (95%CI)    | LA<br>OR<br>(95%CI) |
| <b>Demographics</b>                                |                  |                  |                    |                  |                     |                  |                     |                     |
| Sex (female)                                       | 0.9(0.2-2.7)     | 1.1(0.3-4.4)     | 0.9(0.3-2.7)       | 1.1(0.3-4.5)     | 0.3(0.0-1.8)        | 0.3(0.0-3.1)     | 2.5(0.5-12.2)       | 2.5(0.5-12.2)       |
| Duration of<br>employment<br>(years)               | 0.9(0.9-1.0)     | 0.9(0.8-0.9)     | 0.9(0.9-1.0)       | 0.9(0.8-0.8)     | 0.9(0.9-1.8)        | 0.7(0.5-1.0)     | 0.9(0.9-1.0)        | 0.9(0.9-1.0)        |
| <b>Latex Exposure</b>                              |                  |                  |                    |                  |                     |                  |                     |                     |
| Exposure<br>status(yes)                            | 2.2(0.7-6.7)     | 2.6(0.7-9.8)     |                    |                  |                     |                  |                     |                     |
| Type of gloves                                     |                  |                  |                    |                  |                     |                  |                     |                     |
| None                                               |                  |                  | 1                  | 1                |                     |                  |                     |                     |
| Exclusive lightly<br>powdered latex<br>glove (yes) |                  |                  | 1.6(0.3-9.8)       | 2.6(0.4-17.7)    |                     |                  |                     |                     |
| Exclusive Powder<br>free latex glove<br>(yes)      |                  |                  | 4.2(1.2-14.1)      | 5.1(1.2-21.2)    |                     |                  |                     |                     |
| Mixed gloves (yes)                                 |                  |                  | 1.7(0.5-5.6)       | 1.7(0.4-7.1)     |                     |                  |                     |                     |

|                                                      |               |              |              |              |               |                |              |               |
|------------------------------------------------------|---------------|--------------|--------------|--------------|---------------|----------------|--------------|---------------|
| Pairs of Powdered latex Gloves in the last 7 days    |               |              |              |              | 1.1(1.0-1.2)  | 1.2(1.0-1.4)   |              |               |
| Pairs of Powder Free Latex Gloves in the last 7 days |               |              |              |              |               |                | 1.0(0.9-1.1) | 1.0(0.9-1.1)  |
| <b>Personal and Medical History</b>                  |               |              |              |              |               |                |              |               |
| Personal history of allergy disease (yes)            | 1.5(0.7-3.3)  | 1.4(0.6-3.2) | 1.5(0.7-3.3) | 1.3(0.6-3.2) | 1.4(0.3-6.8)  | 1.6(0.2-11.6)  | 1.0(0.4-2.9) | 0.9(0.3-2.8)  |
| Family history of allergy disease (yes)              | 1.0(0.45-2.2) | 0.9(0.4-2.2) | 1.1(0.5-2.3) | 0.9(0.4-2.3) | 0.4(0.1-1.9)  | 0.5(0.1-3.6)   | 0.7(0.2-2.0) | 0.8(0.3-2.7)  |
| Fruit allergy (yes)                                  | 2.3(0.8-6.7)  | 3.1(1.1-9.2) | 2.2(0.8-6.5) | 3.0(0.9-9.1) | 5.0(0.4-56.9) | 9.7(0.6-163.0) | 1.7(0.3-8.5) | 2.0(0.4-10.4) |
| Previous open surgery (yes)                          | 2.0(0.9-4.4)  | 1.9(0.8-4.6) | 2.1(0.9-4.6) | 1.9(0.8-4.7) | 1.4(0.3-7.4)  | 1.2(0.1-11.1)  | 1.1(0.4-3.2) | 1.2(0.4-3.8)  |

†Latex Skin Prick Test Positive

‡Latex Skin Prick Test Positive and work related clinical symptoms of allergy

\*Model included latex glove exposure status

\*\*Model included type of gloves

\*\*\*Model included number of pairs of powdered latex gloves

\*\*\*\*Model included number of pairs of powder free latex gloves

1  
2  
3  
4  
5  
6  
7  
8  
9  
10  
11  
12  
13  
14  
15  
16  
17  
18  
19  
20  
21  
22  
23  
24  
25  
26  
27  
28  
29  
30  
31  
32  
33  
34  
35  
36  
37  
38  
39  
40  
41  
42  
43  
44  
45  
46  
47  
48  
49  
50  
51  
52  
53  
54  
55  
56  
57  
58  
59  
60STROBE Statement—Checklist of items that should be included in reports of *cross-sectional studies*

|                              | Item No | Recommendation                                                                                                                                                                                                                                                                                                                                                                                                |
|------------------------------|---------|---------------------------------------------------------------------------------------------------------------------------------------------------------------------------------------------------------------------------------------------------------------------------------------------------------------------------------------------------------------------------------------------------------------|
| <b>Title and abstract</b>    | 1       | (a) Indicate the study's design with a commonly used term in the title or the abstract<br>(b) Provide in the abstract an informative and balanced summary of what was done and what was found                                                                                                                                                                                                                 |
| <b>Introduction</b>          |         |                                                                                                                                                                                                                                                                                                                                                                                                               |
| Background/rationale         | 2       | Explain the scientific background and rationale for the investigation being reported                                                                                                                                                                                                                                                                                                                          |
| Objectives                   | 3       | State specific objectives, including any prespecified hypotheses                                                                                                                                                                                                                                                                                                                                              |
| <b>Methods</b>               |         |                                                                                                                                                                                                                                                                                                                                                                                                               |
| Study design                 | 4       | Present key elements of study design early in the paper                                                                                                                                                                                                                                                                                                                                                       |
| Setting                      | 5       | Describe the setting, locations, and relevant dates, including periods of recruitment, exposure, follow-up, and data collection                                                                                                                                                                                                                                                                               |
| Participants                 | 6       | (a) Give the eligibility criteria, and the sources and methods of selection of participants                                                                                                                                                                                                                                                                                                                   |
| Variables                    | 7       | Clearly define all outcomes, exposures, predictors, potential confounders, and effect modifiers. Give diagnostic criteria, if applicable                                                                                                                                                                                                                                                                      |
| Data sources/<br>measurement | 8*      | For each variable of interest, give sources of data and details of methods of assessment (measurement). Describe comparability of assessment methods if there is more than one group                                                                                                                                                                                                                          |
| Bias                         | 9       | Describe any efforts to address potential sources of bias                                                                                                                                                                                                                                                                                                                                                     |
| Study size                   | 10      | Explain how the study size was arrived at                                                                                                                                                                                                                                                                                                                                                                     |
| Quantitative variables       | 11      | Explain how quantitative variables were handled in the analyses. If applicable, describe which groupings were chosen and why                                                                                                                                                                                                                                                                                  |
| Statistical methods          | 12      | (a) Describe all statistical methods, including those used to control for confounding<br>(b) Describe any methods used to examine subgroups and interactions<br>(c) Explain how missing data were addressed<br>(d) If applicable, describe analytical methods taking account of sampling strategy<br>(e) Describe any sensitivity analyses                                                                    |
| <b>Results</b>               |         |                                                                                                                                                                                                                                                                                                                                                                                                               |
| Participants                 | 13*     | (a) Report numbers of individuals at each stage of study—eg numbers potentially eligible, examined for eligibility, confirmed eligible, included in the study, completing follow-up, and analysed<br>(b) Give reasons for non-participation at each stage<br>(c) Consider use of a flow diagram                                                                                                               |
| Descriptive data             | 14*     | (a) Give characteristics of study participants (eg demographic, clinical, social) and information on exposures and potential confounders<br>(b) Indicate number of participants with missing data for each variable of interest                                                                                                                                                                               |
| Outcome data                 | 15*     | Report numbers of outcome events or summary measures                                                                                                                                                                                                                                                                                                                                                          |
| Main results                 | 16      | (a) Give unadjusted estimates and, if applicable, confounder-adjusted estimates and their precision (eg, 95% confidence interval). Make clear which confounders were adjusted for and why they were included<br>(b) Report category boundaries when continuous variables were categorized<br>(c) If relevant, consider translating estimates of relative risk into absolute risk for a meaningful time period |
| Other analyses               | 17      | Report other analyses done—eg analyses of subgroups and interactions, and sensitivity analyses                                                                                                                                                                                                                                                                                                                |

| <b>Discussion</b>        |    |                                                                                                                                                                            |
|--------------------------|----|----------------------------------------------------------------------------------------------------------------------------------------------------------------------------|
| Key results              | 18 | Summarise key results with reference to study objectives                                                                                                                   |
| Limitations              | 19 | Discuss limitations of the study, taking into account sources of potential bias or imprecision. Discuss both direction and magnitude of any potential bias                 |
| Interpretation           | 20 | Give a cautious overall interpretation of results considering objectives, limitations, multiplicity of analyses, results from similar studies, and other relevant evidence |
| Generalisability         | 21 | Discuss the generalisability (external validity) of the study results                                                                                                      |
| <b>Other information</b> |    |                                                                                                                                                                            |
| Funding                  | 22 | Give the source of funding and the role of the funders for the present study and, if applicable, for the original study on which the present article is based              |

\*Give information separately for exposed and unexposed groups.

**Note:** An Explanation and Elaboration article discusses each checklist item and gives methodological background and published examples of transparent reporting. The STROBE checklist is best used in conjunction with this article (freely available on the Web sites of PLoS Medicine at <http://www.plosmedicine.org/>, Annals of Internal Medicine at <http://www.annals.org/>, and Epidemiology at <http://www.epidem.com/>). Information on the STROBE Initiative is available at [www.strobe-statement.org](http://www.strobe-statement.org).



1  
2  
3 1 **The prevalence of latex sensitisation and allergy and associated risk factors among healthcare**  
4 **workers using hypoallergenic latex gloves at King Edward VIII Hospital, KwaZulu-Natal South**  
5 **Africa: A cross sectional study**  
6  
7  
8

9  
10 4  
11 5 S M Phaswana<sup>1</sup>, S Naidoo<sup>1</sup>

12  
13 6 <sup>1</sup>Discipline of Occupational and Environmental Health, School of Nursing and Public Health,  
14 7 University of kwaZulu Natal, South Africa  
15

16 8  
17  
18 9 Contact Details for Corresponding Author  
19

20 10 Dr Shumani Makwarela Phaswana  
21

22 11 306 Valhaven  
23

24 12 80 Cromwell Road  
25

26 13 Glenwood  
27

28 14 Durban  
29

30 15 4001  
31

32 16 E-mail: [shuma8008@yahoo.com](mailto:shuma8008@yahoo.com)  
33

34 17 Tel nr: 031 260 4507  
35

36 18 Fax nr: 031 260 4663  
37

38 19  
39  
40 20 Keywords: Latex, hypoallergenic, healthcare workers, South Africa  
41

42 21 Word Count:  
43

44 22 Abstract: 299  
45

46 23 Body: 4,359  
47

48 24  
49  
50  
51

52 25  
53  
54

55 26  
56  
57  
58  
59  
60

27

**ARTICLE SUMMARY****ARTICLE FOCUS**

- The use of hypoallergenic latex gloves has been adopted as policy in different healthcare settings globally.
- However, information with regard to their use and the development of latex sensitisation and allergy among exposed healthcare workers is limited.
- We hypothesised that there is latex sensitization and allergy in healthcare workers using hypoallergenic latex gloves in a South African hospital.

**KEY MESSAGE**

- In the presence of powder free hypoallergenic gloves, latex sensitisation and latex allergy is still an important occupational health effect in healthcare workers.
- Healthcare workers should be continuously monitored for the development of latex sensitisation and allergy.
- There is a need for a national policy accompanied by clear implementation plans as well as sustainable education and training programmes to address latex sensitisation and allergy among HCWs.

**STRENGTH AND LIMITATIONS**

- Strength of the study included the presence of a control group providing a background prevalence of latex sensitisation in this population and random selection of participants which minimised the potential of participant bias that arises with a volunteer approach.
- This study was limited by the cross sectional study design as it only allowed for the determination of the prevalence of latex sensitisation; recall bias with regard to the number of gloves used in the past 7 working days and the self-reporting of personal and family atopic disorders may have resulted in the misclassification of exposure and atopy respectively.

28

29

30

1  
2  
3  
4  
5  
6  
7  
8  
9  
10  
11  
12  
13  
14  
15  
16  
17  
18  
19  
20  
21  
22  
23  
24  
25  
26  
27  
28  
29  
30  
31  
32  
33  
34  
35  
36  
37  
38  
39  
40  
41  
42  
43  
44  
45  
46  
47  
48  
49  
50  
51  
52  
53  
54  
55  
56  
57  
58  
59  
60

31 **What this paper adds**

32  In the presence of powder free hypoallergenic gloves, latex sensitisation and latex allergy is still an  
33 important occupational health **hazard** in healthcare workers

34  Healthcare workers should be continuously monitored for the development of latex sensitisation and  
35 allergy

36  There is a need for a national policy accompanied by clear implementation plans as well as sustainable  
37 education and training programmes to address latex sensitisation and allergy among HCWs

38

For peer review only

1  
2  
3 39  
4  
5  
67 **40 ABSTRACT**8  
9 **41 Objectives**

10  
11  
12 42 The present study describes latex sensitisation and allergy prevalence and associated factors among  
13  
14 43 healthcare workers using hypoallergenic latex gloves at King Edward VIII Hospital in KwaZulu-Natal  
15  
16  
17 44 South Africa.

18  
19  
20 **45 Design**

21  
22  
23 46 Cross sectional study

24  
25  
26 **47 Setting**

27  
28  
29 48 A tertiary hospital in eThekweni municipality, KwaZulu Natal, South Africa

30  
31  
32 **49 Participants**

33  
34  
35 50 600 healthcare workers were randomly selected and 501(337 exposed and 164 unexposed) participated.  
36  
37 51 Participants who were pregnant, less than one year of work as healthcare worker and history of  
38  
39 52 anaphylactic reaction were excluded from the study.

40  
41  
42 **53 Primary and secondary outcome measures**

43  
44  
45 54 Latex sensitisation and latex allergy were the outcome of interest and they were successfully measured

46  
47  
48 **55 Results**

49  
50  
51 56 Prevalence of latex sensitisation and allergy was observed among exposed workers (7.1% and 5.9%) and  
52  
53 57 unexposed workers (3.1% and 1.8%). Work related allergy symptoms were significantly higher in  
54  
55 58 exposed workers (40.9%,  $p < 0.05$ ). Duration of employment was inversely associated with latex allergy  
56  
57 59 (OR: 0.9; 95% CI: 0.8-0.9). The risk of latex sensitisation (OR: 4.2; 95% CI: 1.2-14.1) and allergy (OR:

1  
2  
3 60 5.1; 95% CI: 1.2-21.2) increased with exclusive use of powder-free latex gloves. A dose –response  
4  
5 61 relationship was observed for powdered latex gloves (OR: 1.1; 95% CI: 1.0-1.2). Atopy (OR: 1.5; 95%  
6  
7 62 CI: 0.7-3.3 and OR: 1.4; 95% CI: 0.6-3.2) and fruit allergy (OR: 2.3; 95% CI: 0.8-6.7 and OR: 3.1; 95%  
8  
9 63 CI: 1.1-9.2) also increased the risk of latex sensitisation and allergy.  
10  
11

## 12 13 **Conclusion**

14  
15  
16 65 This study adds to previous findings that healthcare workers exposed to hypoallergenic latex gloves are at  
17  
18 66 risk for developing latex sensitisation highlighting its importance as an occupational hazard in healthcare.  
19  
20 67 More research is needed to identify the most cost effective way of implementing a latex free environment  
21  
22 68 in resource limited countries, such as South Africa. In addition more cohort analysis is required to better  
23  
24 69 understand the chronicity of illness and disability associated with latex allergy.  
25  
26  
27  
28 70

## 71 INTRODUCTION

72 Latex allergy (LA) as an occupational disease among healthcare workers (HCWs) gained  
73 recognition after Nutter published a case report of contact urticaria in a HCW in 1979.<sup>1</sup> The  
74 increase in prevalence coincided with the emergence of the Human Immunodeficiency Virus/  
75 Acquired immunodeficiency syndrome (HIV/AIDS) epidemic and the introduction of “universal  
76 precautions” in the healthcare industry which had resulted in the increased use of latex gloves  
77 among HCWs.<sup>2</sup>

78 Latex gloves are preferred due to their superior barrier and physical properties as compared to  
79 the non-latex gloves.<sup>3</sup> International epidemiological studies have reported the prevalence of latex  
80 allergy among HCWs to range between 2-22% depending on the population and diagnostic  
81 methods used.<sup>4-11</sup> The prevalence in the general population has been reported to range between  
82 1-6%.<sup>12, 13</sup> In South Africa studies amongst HCWs reported a latex sensitisation prevalence of  
83 between 2.7 to 20.8%.<sup>14-16</sup> Latex allergy in HCWs is a compensable disease in South Africa in  
84 terms of the Compensation of Occupational Injuries and Diseases Act No. 130 of 1993.<sup>17</sup>

85 Powdered latex gloves were identified as an important risk factor for latex sensitisation and  
86 allergy in HCWs as they were found to contain high allergenic protein content.<sup>18</sup> Following these  
87 findings, hypoallergenic gloves with low allergen content namely, low powdered and powder  
88 free latex gloves were introduced. The European definition of powder free gloves is gloves with  
89 powder content not exceeding 2 mg per glove and leachable latex protein which is as low as is  
90 reasonably practical.<sup>19</sup>

91 Hypoallergenic gloves have been associated with reduced latex aeroallergen concentrations,  
92 reduced conversion rates and a subsequent decrease in clinic visits, and compensation claims for

1  
2  
3 93 latex induced occupational asthma and allergic contact dermatitis among HCWs.<sup>18, 20</sup> As much as  
4  
5  
6 94 the use of low or powder free gloves has been shown to reduce latex related symptoms, other  
7  
8 95 studies have shown that exposed HCWs still exhibit symptoms at very low levels of measureable  
9  
10 96 airborne latex allergens.<sup>21</sup> Most studies have reported on the airborne levels and inhalational  
11  
12 97 route of exposure hence the recommendation on low powdered or powder free latex gloves.  
13  
14  
15 98 There is little consideration given to the dermal route of exposure despite the fact that exposure  
16  
17 99 is as a result of direct contact in these instances.<sup>22</sup> Eliminating the cornstarch powder only  
18  
19  
20 100 removed the carrier and not the source of allergen which is in the latex itself. Therefore workers  
21  
22 101 using powder free gloves are still exposed to the allergenic content of latex gloves. It has been  
23  
24 102 shown that different brands from different suppliers contain differing levels of protein due to a  
25  
26 103 lack of standards in latex glove manufacture.<sup>23</sup> A South African study reported that some powder  
27  
28 104 free latex gloves were found to have high allergenic protein content.<sup>23</sup> **HCWs using these gloves**  
29  
30 **are exposed via direct dermal contact and are at risk for developing latex sensitization which**  
31  
32 **maybe asymptomatic and if exposure continues they can later develop latex allergy which**  
33  
34 **presents with clinical manifestations.**  
35  
36  
37  
38  
39  
40 108 While it is important to diagnose and manage an individual worker with latex allergy **in the early**  
41  
42 109 **stages of the disease**, complete control of hazardous substance in the workplace is equally if not  
43  
44 110 more important. While a latex free work environment would be a preferred control strategy,  
45  
46 111 substitution of powdered latex gloves with powder free gloves was shown to be cost effective  
47  
48 112 and associated with improved clinical outcome.<sup>20, 24-26</sup> As a result this was adopted as the most  
49  
50 113 reasonable and practical approach in addressing the problem of latex allergy among HCWs both  
51  
52 114 internationally and to some extent nationally.<sup>27-29</sup> This has proven to reduce latex induced  
53  
54 115 clinical outcomes. Even with this intervention, studies in Western countries such as Germany  
55  
56  
57  
58  
59  
60

1  
2  
3 116 and the UK have shown that the risk of latex sensitisation still exists and more needs to be done  
4  
5 117 to protect HCWs.<sup>30, 31</sup>  
6  
7

8  
9 118 The current study described the prevalence of latex sensitisation and allergy among healthcare  
10  
11 119 workers who use hypoallergenic powder free and lightly powdered latex gloves.  
12  
13

## 14 15 120 **METHODS**

### 16 17 18 121 **Study design and population** 19

20  
21  
22 122 This was a cross sectional study conducted between July 2011 and January 2012. The study  
23  
24 123 location was King Edward VIII hospital, the second largest hospital in the Southern hemisphere,  
25  
26 124 providing regional and tertiary services to the whole of KwaZulu-Natal (KZN) and the Eastern  
27  
28 125 Cape Province in South Africa. It has a bed status of 1300 and has a workforce of 2400. The  
29  
30 126 hospital was chosen due to the large workforce with different departments, and the policy of  
31  
32 127 using both powder free and low powdered latex gloves for approximately 10 years.  
33  
34  
35

36  
37 128 The study population was limited to HCWs currently employed at King Edward VIII Hospital  
38  
39 129 for more than 12 months. HCWs were defined as all personnel employed in the hospital.  
40  
41

42  
43 130 The prevalence of latex sensitization in HCWs using powdered latex gloves in the Western Cape  
44  
45 131 Province was 11.9% in 2001.<sup>16</sup> We expected the prevalence at King Edward VIII hospital to be  
46  
47 132 less than the 11.9% observed in the Western Cape Province due to the adoption of a  
48  
49 133 hypoallergenic latex glove policy in 2001. Using EPI Info calculator version 3.04.04., it was  
50  
51 134 assumed that 50% of sensitised workers have remained sensitised despite the introduction of  
52  
53 135 hypoallergenic latex gloves 10 years prior. Using an expected latex sensitization prevalence of  
54  
55 136 6% for the exposed group and the prevalence among the general population being reported as  
56  
57  
58  
59  
60



1  
2  
3 137 less than 1% the required sample size was calculated to be 585 participants 2 exposed  
4  
5  
6 138 participants for every 1 non-exposed participant (exposed =390; unexposed =195). HCWs were  
7  
8 139 considered to be exposed if they were likely to use gloves. Unexposed HCWs were drawn from  
9  
10  
11 140 the administrative staff of the hospital.

## 141 **Questionnaire**

142 We used an adaptation of the questionnaire used in an epidemiological study conducted at  
143 Groote Schuur in 2001<sup>16</sup> with permission from Professor Paul Potter, Allergology Unit, Medical  
144 School, University of Cape Town. The questionnaire containing open and closed ended questions  
145 was adapted to include items on exposure assessment. The questionnaire was administered by a  
146 trained research assistant immediately prior to the skin prick test. The questionnaire collected  
147 data on the participants' demographics, personal risk factors, latex exposure assessment, clinical  
148 manifestations of latex sensitization (dermal and respiratory) and history of previous reactions  
149 suggestive of latex allergy.

## 150 **Exposure Assessment**

### 151 *Individual Exposure*

152 Individual latex exposure was determined by the type of gloves used, number of gloves used per  
153 day, and duration of glove use. The information was limited to 7 working shifts/days prior to the  
154 interview.

### 155 *Departmental Exposure*

1  
2  
3 156 Departmental exposure was defined as glove usage in the past 12 months (01 January 2011-31  
4  
5  
6 157 December 2011). The overall departmental exposure was obtained by reviewing monthly glove  
7  
8 158 usage by each department from the stock room register. This was used to estimate the annual  
9  
10 159 exposure for employees who had rotated through different departments in the past 12 months.  
11  
12 160 Non sterile latex gloves are distributed throughout the clinical departments while a high  
13  
14 161 proportion of sterile gloves are distributed to labour ward, theatre, surgical wards and outpatient  
15  
16 162 departments. Glove type was defined as powdered and powder-free and latex free based on the  
17  
18 163 previous literature.<sup>23, 32</sup>  
19  
20  
21  
22

### 23 164 **Skin prick test (SPT)**

24  
25  
26 165 The SPT was conducted using the Stallergenes kit.<sup>32</sup> It was performed in a room with access to  
27  
28 166 emergency resuscitation services by a trained research assistant. The research assistant and  
29  
30 167 principal investigator were trained on 2 separate occasions. The test was performed on the inner  
31  
32 168 aspect of the participants' forearms, between the wrist and the elbow on normal skin. A positive  
33  
34 169 and negative control were performed using histamine (0.61% concentration of phenol) and  
35  
36 170 buffered normal saline solution respectively on the same arm and they were 3 cm apart to  
37  
38 171 prevent cross contamination. The protein concentration of the latex extract was 500µg/ml and the  
39  
40 172 solution was applied as it was with no further dilutions. After 15-20 minutes subsequent to  
41  
42 173 puncturing the skin, the SPT reaction wheal and flare was outlined by a black ink and clear tape  
43  
44 174 was used to transfer the outline from skin to the results sheet by the trained research assistant or  
45  
46 175 principal investigator.<sup>33</sup> A positive result was indicated by a mean wheal diameter measuring 3  
47  
48 176 mm or greater than the negative control. Results were recorded on a standardized result sheet.  
49  
50 177 The research assistant's test performance was audited by the principal investigator at regular  
51  
52 178 intervals to ensure correctness of technique and interpretation of the results.  
53  
54  
55  
56  
57  
58  
59  
60

1  
2  
3 179 Informed signed consent was obtained from all the participants prior to participation. They had  
4  
5  
6 180 the option of participating in the questionnaire interview and the SPT or refusing the SPT. The  
7  
8 181 study protocol was approved by the Biomedical Research Ethics Committee of the University of  
9  
10 182 KwaZulu-Natal (BE048/11). Permission to conduct the study was also obtained from the KZN  
11  
12 183 Provincial Department of Health and King Edward VIII hospital management.

### 16 184 **Statistical analysis**

17  
18  
19 185 Data was captured in Excel and analysed in Stata Version 11. Frequencies and medians with  
20  
21 186 ranges were presented for categorical and continuous variables respectively. **The Chi-square and**  
22  
23 187 **the Kruskal-Wallis test were used to test for significant associations between categorical and**  
24  
25 188 **continuous variables and the dependent variables under study on bivariate analysis, respectively.**

26  
27  
28  
29  
30 189 Binary logistic regression was used to test for significant associations between independent and  
31  
32 190 dependent variables on multivariate analysis. The dependent variables used in the regression  
33  
34 191 analysis were: Latex sensitisation, which was defined as having a SPT wheal of  $\geq 3$ mm to latex  
35  
36 192 extract; Latex allergy (LA) was defined as being SPT positive and a report of having any one or  
37  
38 193 more of the listed work related clinical symptoms namely itchy eyes, red eyes, runny eyes, runny  
39  
40 194 nose, itchy nose, sneezing, coughing, tight chest, wheezing, itchy skin, skin rash or dizziness.  
41  
42 195 Independent variables that were considered for analysis were as follows: Age (yrs.) and sex,  
43  
44 196 duration of employment, job title, current department employed in, type of gloves used, number  
45  
46 197 of pairs of gloves used per day, self reported and family history of atopy, food allergy and  
47  
48 198 previous history of open surgery and number of surgical procedures. In the multivariate analysis,  
49  
50 199 age was omitted due to collinearity with duration of employment. **Departmental glove**  
51  
52 200 **consumption was omitted as this only indicated annual distribution of gloves per department and**  
53  
54  
55  
56  
57  
58  
59  
60

1  
2  
3 201 not necessarily employees' exposure since enrolled nursing assistants and enrolled nurses are  
4  
5 202 rotated through different departments in any given year. The number of pair of gloves was used  
6  
7  
8 203 as an indicator of individual latex glove exposure. The variable number of pairs of gloves used  
9  
10 204 and duration of employment were retained as continuous variables in the multivariate model.  
11  
12 205 Fractional polynomial and a fractional plot was used to visualise the dose-response relationship  
13  
14 206 of these continuous exposure variables.  
15  
16  
17  
18

## 19 207 RESULTS

### 22 208 Participant Demographics

23  
24  
25 209 Sixty five HCWs refused to participate in the study. Among the 520 HCWs who responded to  
26  
27 210 the invitation there was an overall participation rate of 85.5 % (n=501) with 3.6% (n=19)  
28  
29 211 refusing SPT. There was no significant difference between those refusing SPT and those who  
30  
31 212 had the SPT with respect to latex exposure status, age, sex and duration of employment.  
32  
33  
34  
35

36 213 The median age of participants was 42.2 years (range: 22 years-65 years) with the greater  
37  
38 214 proportion of them being females. The median duration of employment was 10.9 years (range: 1  
39  
40 215 year-42 years) with the majority of exposed participants having worked as a HCW for < 10  
41  
42 216 years. Most unexposed healthcare workers had been employed for > 20 years. Personal and  
43  
44 217 family history of allergy was more prevalent among unexposed HCWs while exposed HCWS  
45  
46 218 reported a higher prevalence of a fruit allergy and history of previous surgery (Table 1).  
47  
48  
49  
50

### 51 219 Prevalence of Latex Sensitisation and Allergy

52  
53  
54 220 The overall prevalence of latex sensitisation and latex allergy were 5.9% (n=29) and 4.6%  
55  
56 221 (n=23) respectively. Although the difference was not significant, the prevalence of latex  
57  
58  
59  
60

1  
2  
3 222 sensitisation was higher among the exposed group (7.1%) as compared to the unexposed group  
4  
5  
6 223 (3.1%). Latex allergy was significantly higher in the exposed group than unexposed group (5.9%  
7  
8 224 vs 1.8%,  $p=0.04$ ). There was a significant difference in the work related allergy symptoms  
9  
10 225 between exposed and unexposed workers (40.9% vs. 31.7%,  $p=0.04$ ) (Table 1). Symptoms that  
11  
12 226 were significantly associated with latex sensitisation were skin rash ( $p<0.000$ ), itchy skin  
13  
14  
15 227 ( $p=0.001$ ), runny nose ( $p=0.004$ ), red eyes ( $p=0.01$ ) and itchy eyes ( $p=0.01$ ).  
16  
17

18 228 The prevalence of latex sensitization was higher among those who were exposed and those with  
19  
20 229 employment duration of < 10yrs. Although the prevalence of latex sensitisation was lower  
21  
22 230 among participants < 30 years of age, there was no significant variation with age or sex. There  
23  
24 231 was a significant difference ( $p=0.04$ ) in the prevalence of fruit allergy between those participants  
25  
26 232 with latex sensitisation (17.2%) and unsensitised participants (6.9%) The exclusive use of  
27  
28 233 powder free latex gloves was found to be significantly ( $p=0.003$ ) higher among the participants  
29  
30 234 who had latex sensitisation. There was equal distribution of powdered and powder free latex  
31  
32 235 gloves among those who reported the use of mixed gloves. The prevalence of reporting previous  
33  
34 236 open surgery and use of other non- occupational exposure latex containing material did not vary  
35  
36 237 significantly between those who had latex sensitisation and those who were unsensitised. There  
37  
38 238 was a significantly higher prevalence of reporting allergic reactions when handling other latex  
39  
40 239 containing medical equipment among participants with latex allergy as compared to unsensitised  
41  
42 240 participants (10.3% vs 1.7%,  $p=0.002$ ) (Table 2).  
43  
44  
45  
46  
47  
48  
49

50 241 **Crude association of demographics, exposure status, medical and personal history and latex**  
51  
52 242 **sensitisation, latex allergy**  
53  
54  
55  
56  
57  
58  
59  
60

1  
2  
3 243 Latex exposure was significantly associated with latex allergy (OR: 3.4; 95% CI: 1.1-10.8).  
4  
5  
6 244 Working as a HCW for 5-9 years was significantly associated with latex sensitisation (OR: 2.6;  
7  
8 245 95% CI: 1.2-5.5) and latex allergy (OR: 3.3; 95% CI: 1.4-7.6), respectively. Employment  
9  
10 246 duration as a HCW for >20 years was protective against latex allergy (OR: 0.2; 95% CI: 0.0-0.8).  
11  
12 247 **In comparison with unexposed workers**, working as an enrolled nurse was significantly  
13  
14  
15 248 associated with both latex sensitisation (OR: 2.5; 95% CI: 1.2-5.3) and latex allergy (OR: 2.4;  
16  
17 249 95% CI: 1.1-5.6). The exclusive use of powder free latex gloves was significantly associated  
18  
19  
20 250 with latex sensitisation (OR: 3.1; 95% CI: 1.4-6.8) and latex allergy (OR: 3.1; 95% CI: 1.7-9.1).  
21  
22 251 Powdered and powder free latex gloves were equally distributed among those who reported the  
23  
24 252 use of mixed gloves. The annual consumption of pairs of gloves per HCW by department was  
25  
26  
27 253 ranked and grouped into tertiles. Although medical and surgical wards had low and moderate  
28  
29 254 pairs of gloves consumption per HCW, these wards had the highest proportion of workers with  
30  
31 255 latex sensitisation (n=6, 20.0% each). However the relation was only significant for those who  
32  
33 256 reported the medical ward as being the current department in which they worked (p=0.01). The  
34  
35 257 proportions for powdered latex glove use were 71% and 69% in medical and surgical wards,  
36  
37 258 respectively and this was not statistically significant. Exposure to other latex containing medical  
38  
39 259 devices was not significantly different from what was reported in other wards. There was no  
40  
41 260 significant association between **reported personal history of allergy disease**, latex sensitisation  
42  
43 261 and latex allergy. Fruit allergy was significantly associated with latex allergy (OR: 3.7; 95%:  
44  
45 262 1.4-10.4) (Table 3). Listed fruits were evaluated for their independent association with latex  
46  
47 263 sensitisation. Avocado (**OR: 12.3; 95% CI: 5.1-29.6**) and others (**OR: 5.1; 95% CI: 2.1-11.8**)  
48  
49 264 which included pineapple and orange showed significant associations with latex sensitisation  
50  
51 265 (data not shown).  
52  
53  
54  
55  
56  
57  
58  
59  
60

## 266 **Multivariate analysis**

267 While latex exposure had estimates of the OR above 2, there was no significant association with  
268 latex sensitisation and latex allergy. Duration of employment was found to be inversely  
269 associated with latex allergy in models I and II. The exclusive use of powder free latex gloves  
270 was significantly associated with latex sensitisation (OR: 4.2; 95% CI: 1.2-14.1) and latex  
271 allergy (OR: 5.1; 95%CI: 1.2-21.2) on multivariate analysis. This significant association  
272 disappeared when examining the number of pairs of powder free gloves used in the last 7 days. A  
273 weak association was observed for the number of pairs of powdered latex gloves used in the last  
274 7 days with both latex sensitisation and latex allergy (model III and IV). Further analysis of  
275 duration of employment and number of pairs of gloves using fractional polynomial failed to  
276 demonstrate a dose-response relationship with either latex sensitisation or latex allergy. There  
277 was a significant association between fruit allergy and latex allergy in model I (OR: 3.1; 95% CI:  
278 1.1-9.2) (Table 4).

## 279 **DISCUSSION**

280 This is an important study for South African HCWs as it examined the risk of latex sensitisation  
281 in a group of workers exposed to hypoallergenic latex gloves. As previously mentioned there has  
282 been no literature documenting the prevalence of latex sensitisation among South African HCWs  
283 using hypoallergenic lightly powdered or powder-free latex gloves. The prevalence of latex  
284 sensitisation among exposed HCWs (7.1%) in this study is comparable to findings among HCWs  
285 in another South African hospital.<sup>14</sup> However it was considerably lower than the 11.9%  
286 prevalence reported by Potter in the same year.<sup>16</sup> While a substantial number of participants  
287 (37%) reported work related allergy symptoms, only 4.6% met our definition of latex allergy.  
288 The important symptoms associated with latex sensitisation were skin rash, itchy skin, runny



1  
2  
3 289 nose, red and itchy eyes in keeping with previous studies. Elimination of powdered latex gloves  
4  
5  
6 290 has shown a reduction in the concentration of aeroallergens in the operating room with the low  
7  
8 291 prevalence of latex allergy in our study population.  
9

10  
11 292 Although the relationship was weak, this study showed that the risk of latex sensitisation  
12  
13  
14 293 decreases with duration of employment. The healthy worker effect is a possible explanation of  
15  
16 294 this finding. Prior to availability of hypoallergenic latex gloves, workers who had developed  
17  
18 295 latex allergy may have left employment or they may have changed their career path and moved  
19  
20  
21 296 into a more administrative or managerial role with no contact with latex gloves. Furthermore  
22  
23  
24 297 new employees are only sensitised and have not yet manifested clinical symptoms and they  
25  
26 298 continue using latex gloves. On the other hand senior HCWs may have been sensitised during  
27  
28 299 their earlier years of employment and as a result they either moved to departments with less  
29  
30  
31 300 exposure to latex gloves or deliberately avoid latex containing products and therefore exhibit less  
32  
33 301 latex related symptoms. Moreover, the introduction of hypoallergenic gloves 10 years prior to  
34  
35 302 the study may explain the reduced sensitisation in senior HCWs as demonstrated in the study by  
36  
37 303 Smith et al in 2007. The published literature has been inconsistent in reporting the association  
38  
39  
40 304 between duration of employment and latex sensitisation. Although latex is one of the best studied  
41  
42 305 allergens, no exposure response studies have been published with measured latex allergen levels.  
43  
44 306 In addition, studies have demonstrated variation in allergen content of different gloves. These  
45  
46  
47 307 may lead to discrepancies in the literature with regard to the role of duration of employment as a  
48  
49 308 surrogate measure of exposure.  
50

51  
52  
53 309 In our study HCWs who exclusively used powdered free latex gloves had a 4 times greater odds  
54  
55 310 of developing latex sensitisation. The fact that HCWs with latex sensitisation or allergy work  
56  
57 311 more often with powder free latex gloves is indicative of reverse causality because of symptoms.  
58  
59  
60



1  
2  
3 312 Moreover the background prevalence of latex sensitisation in this study was relatively higher  
4  
5 313 (3.5%) than previously reported prevalence in the general population by Bousquet et al.<sup>13</sup> Studies  
6  
7  
8 314 have shown that some of these “hypoallergenic” latex gloves actually contain high levels of  
9  
10 315 allergens which can be release into the environment with aggressive manipulation.<sup>23</sup> Some of the  
11  
12 316 sensitised HCWs may have been sensitised before the hospital implemented a hypoallergenic  
13  
14 317 latex glove policy. Also Smith et al showed that complete avoidance of powdered latex glove can  
15  
16 318 result in the reduction or no change in measurable IgE antibodies.<sup>34</sup> A study in Germany reported  
17  
18 319 a high prevalence of 8% among 226 dental students who had only been exposed to exclusive  
19  
20 320 powder free latex gloves.<sup>30</sup> Similarly in the UK despite a total ban on powdered latex gloves  
21  
22 321 Clayton found a 10% prevalence of latex sensitisation in HCWs.<sup>31</sup> It is also not clear to what  
23  
24 322 extent the aeroallergens released by colleagues using powdered latex gloves influence this  
25  
26 323 finding. Furthermore the role of other latex containing medical devices during sensitisation  
27  
28 324 period cannot be entirely ruled out.  
29  
30  
31  
32  
33  
34

35 325 In our study, frequency of exposure as measured by the number of gloves used in the last 7  
36  
37 326 working days showed a weak association between powdered latex gloves and latex sensitisation  
38  
39 327 but no association could be demonstrated with powder free latex gloves. Airborne latex  
40  
41 328 aeroallergens have been shown to increase with the number of powdered gloves used which  
42  
43 329 subsequently increases the risk of latex sensitisation and clinical latex glove related allergy  
44  
45 330 symptoms.<sup>18</sup>  
46  
47  
48  
49

50 331 The positive association between department with low glove consumption per HCW and latex  
51  
52 332 sensitisation is in contrast with previous finding by Liss and co-workers.<sup>9</sup> They reported positive  
53  
54 333 association with departments that had high glove consumption per HCWs. **Again, this could be**  
55  
56 334 **as a result of reverse causality where HCWs with latex sensitisation may have been relocated to**  
57  
58  
59  
60

1  
2  
3 335 wards with low glove consumption to minimise the exposure. In addition, the annual pair of  
4  
5  
6 336 gloves consumption per HCW by department does not provide an accurate indication of  
7  
8 337 individual exposure; rather it gives us the annual distribution of gloves to different departments.  
9

10  
11 338 Several studies have reported atopy as a significant risk factor for latex sensitisation.<sup>9, 10, 35</sup>

12  
13  
14 339 Similarly, the prevalence of reporting a history of personal atopy in this study was higher among  
15  
16 340 latex sensitised participants although the association was not statistically significant. The role of  
17  
18 341 atopy is complex because some individuals might also have become atopic after having been  
19  
20  
21 342 latex sensitised and cross sectional study is not suitable in establishing this association.  
22  
23

24 343 Fruit latex allergy syndrome is a phenomenon seen where latex sensitised individuals  
25  
26 344 demonstrate a cross reactivity with specific foods; particularly fruit. Studies have identified this  
27  
28  
29 345 phenomenon among sensitised HCWs and the general population. This has been attributed to the  
30  
31 346 similarity between fruit proteins and latex allergens.<sup>36</sup> Fruit allergy was significantly associated  
32  
33  
34 347 with latex sensitisation and latex allergy in our study. Our study was dependent on the self-  
35  
36 348 reporting of fruit allergy and no objective tests were carried out. It is therefore possible that  
37  
38  
39 349 participants have independent simultaneous allergies to both fruit and latex without cross  
40  
41 350 reactivity. Also, we were unable to determine whether latex sensitisation preceded the  
42  
43 351 development of fruit allergy or vice versa. Fruit allergy prior to latex exposure could have  
44  
45  
46 352 contributed to the association observed in our study.  
47  
48

49 353 Latex sensitised participants reported a high prevalence of a history of previous open surgery in  
50  
51 354 our study. This has been reported to occur as a result of direct intraoperative exposure to latex  
52  
53  
54 355 containing medical devices such as catheters or tubes. Studies in children with congenital  
55  
56 356 abnormalities have demonstrated that the risk for latex allergy increases with the number of open  
57  
58  
59  
60

1  
2  
3 357 surgical procedures that they undergo.<sup>37</sup> Frequency of invasive procedures among adults was  
4  
5  
6 358 shown to increase the risk of latex sensitisation reporting while more than 10 procedures  
7  
8 359 increased the risk of developing latex allergy.<sup>38</sup>  
9

10  
11 360 Strengths of this study include the high response rate (85.5%) and comparability to other  
12  
13 361 studies.<sup>8, 16</sup> Access to the hospital employee database allowed us to better assess the  
14  
15 362 representativeness of this study population by comparing demographic data of the non-  
16  
17 363 participants and the participants. The participants were randomly selected minimising the  
18  
19 364 potential of participant's bias that comes with a volunteer approach.  
20  
21

22  
23  
24 365 The presence of a control group provided a background prevalence of latex sensitisation in this  
25  
26 366 population which allowed for a better estimation of associations attributable to work related  
27  
28 367 factors. The use of Stallergenes latex specific SPT further strengthens the study. The SPT test is  
29  
30 368 regarded as the gold standard for the diagnosis of latex allergy and Stallergenes has been shown  
31  
32 369 to have a diagnostic sensitivity and specificity of 93% and 100%, respectively.<sup>32</sup> The research  
33  
34 370 assistant employed on this study was trained and initially shadowed and periodically supervised  
35  
36 371 by the principal investigator to ensure appropriate administration of the questionnaire and the  
37  
38 372 SPT thereby improving the reliability and validity of the study.  
39  
40  
41  
42

43  
44 373 This study was limited by the cross sectional study design which was relatively low in cost and  
45  
46 374 quick to conduct. It only allowed for the determination of prevalence of latex sensitisation at one  
47  
48 375 point in time. Consequently the prevalence of latex sensitisation may have been underestimated  
49  
50 376 as it is possible that HCWs who had already developed latex sensitisation have left the hospital  
51  
52 377 before the study was conducted. **Some of the observed associations in the study may be as a**  
53  
54 378 **result of a complex interplay between the healthy worker effect, reverse causality and exposure**  
55  
56  
57  
58  
59  
60

1  
2  
3 379 reduction by the introduction of powder free latex gloves. These interactions can be better  
4  
5  
6 380 explored and understood in a longitudinal study. Recall bias is another potential limitation in this  
7  
8 381 study as workers were asked to recall the number of gloves used in the past 7 working days.  
9  
10 382 HCWs may have overestimated or underestimated their individual exposures. Our study  
11  
12 383 depended on self-reporting of personal and family atopic disorders and this may have resulted in  
13  
14 384 the misclassification of atopy. The role of atopy and cross-reactivity between allergens is a  
15  
16 385 complex phenomenon which cannot be investigated in cross sectional study. Therefore, cohort  
17  
18 386 studies are necessary to disentangle this phenomenon.  
19  
20  
21  
22

## 23 387 **CONCLUSION**

24  
25 388 This study shows that even in the presence of powder free hypoallergenic glove use there is latex  
26  
27 389 sensitisation and latex allergy, adding to previous findings that HCWs exposed to hypoallergenic  
28  
29 390 latex gloves are still at risk for developing latex sensitisation and latex allergy. This indicates that  
30  
31 391 latex sensitisation and allergy are still an important occupational hazard for HCWs. While it may  
32  
33 392 be economically impractical to replace the latex gloves in our setting, reduction of allergen  
34  
35 393 content in latex products is another strategy that can be implemented to address the problem and  
36  
37 394 protect HCWs. A policy accompanied by clear implementation plans as well as sustainable  
38  
39 395 education and training programmes to address latex sensitisation and allergy among HCWs  
40  
41 396 should be implemented.<sup>39</sup> In addition HCWs must be continuously monitored for the  
42  
43 397 development of latex sensitisation and alternate latex free glove must be made available for  
44  
45 398 them. More research is needed to identify the most cost effective way of implementing a latex  
46  
47 399 free environment in resource limited countries, such as South Africa. In addition the current  
48  
49 400 studies in South Africa have largely been cross-sectional in nature. More cohort analysis is  
50  
51 401 required to better understand the chronicity of illness and disability associated with latex allergy.  
52  
53  
54  
55  
56  
57  
58  
59  
60

1  
2  
3 402 **ACKNOWLEDGEMENT**  
4

5  
6 403 I would like to thank the hospital employees participating in this study and their management for  
7  
8 404 allowing me access to the human resource database. I would like to thank Professor Mohamed  
9  
10 405 Jeebhay (Centre of Occupational and Environmental Health, University of Cape Town, SA) and  
11  
12 406 Professor David L Nordstrom (Occupational and Environmental Safety and Health, University of  
13  
14 407 Wisconsin-Whitewater, USA) for their comments on my initial proposal. I would like to thank  
15  
16 408 Professor Rajen Naidoo (Discipline of Occupational and Environmental Health, UKZN, SA) for  
17  
18 409 his statistical advice during the data analysis. In addition thank you to Mr. Nhlanhla Jwara for  
19  
20 410 conducting the field work.  
21  
22  
23  
24

25  
26 411 **Contributorship**  
27

28  
29 412 Dr Shumani Phaswana is the principal investigator who was involved from the conception of the idea,  
30  
31 413 proposal writing, data collection, data management and interpretation of the results.  
32  
33

34 414 Dr Saloshni Naidoo contributed to the conception and design of the study, analysis and interpretation of  
35  
36 415 the data, critical review of the intellectual content of the article and final approval of the article.  
37  
38

39 416 **Data sharing**  
40

41  
42 417 No additional unpublished data  
43  
44

45  
46 418 **Funding**  
47

48  
49 419 None  
50  
51

52  
53 420 **Competing interests**  
54

55  
56 421 None  
57  
58

59 422  
60

## 423 REFERENCES

- 424 1. Nutter AF. Contact urticaria to rubber. *The Bri J Dermatol*. 1979; 101: 597-8.
- 425 2. Centers for Disease Control. Recommendations for prevention of HIV transmission in health-  
426 care settings. *MMWR Morb and Mort Wkly Rep*. 1987; 36 Suppl 2: 1S-18S.
- 427 3. Rego A, Roley L. In-use barrier integrity of gloves: latex and nitrile superior to vinyl. *Am J Infect*  
428 *Control*. 1999; 27: 405-10.
- 429 4. Leung R, Ho A, Chan J, et.al. Prevalence of latex allergy in hospital staff in Hong Kong. *Clin Exp*  
430 *Allergy* 1997; 27: 167-74.
- 431 5. Chaiear N, Jindawong B, Boonsawas W, et.al. Glove allergy and sensitization to natural rubber  
432 latex among nursing staff at Srinagarind Hospital, Khon Kaen, Thailand. *J Med Assoc Thailand*. 2006; 89:  
433 368-76.
- 434 6. Wan KS, Lue HC. Latex allergy in health care workers in Taiwan: prevalence, clinical features. *Int*  
435 *Arch Occup Environ Health*. 2007; 80: 455-7.
- 436 7. Douglas R, Morton J, Czarny D, et.al. Prevalence of IgE-mediated allergy to latex in hospital  
437 nursing staff. *Aust N Z J Med*. 1997; 27: 165-9.
- 438 8. Grzybowski M, Ownby DR, Peyser PA, et.al. The prevalence of anti-latex IgE antibodies among  
439 registered nurses. *J Allergy Clin Immunol*. 1996; 98: 535-44.
- 440 9. Liss GM, Sussman GL, Deal K, et al. Latex allergy: epidemiological study of 1351 hospital workers.  
441 *Occup Environ Med*. 1997; 54: 335-42.
- 442 10. Watts DN, Jacobs RR, Forrester B, et.al. An evaluation of the prevalence of latex sensitivity  
443 among atopic and non-atopic intensive care workers. *Am J Ind Med*. 1998; 34: 359-63.
- 444 11. Verna N, Di Giampaolo L, Renzetti A, et al. Prevalence and risk factors for latex-related diseases  
445 among healthcare workers in an Italian general hospital. *Ann Clin Lab Sci*. 2003; 33: 184-91.
- 446 12. Porri F, Lemiere C, Birnbaum J, et al. Prevalence of latex sensitization in subjects attending  
447 health screening: implications for a perioperative screening. *Clin Exp Allergy* . 1997; 27: 413-7.
- 448 13. Bousquet J, Flahault A, Vandenplas O, et al. Natural rubber latex allergy among health care  
449 workers: a systematic review of the evidence. *J Allergy Clin Immunol*. 2006; 118: 447-54.
- 450 14. Brathwaite N, Motala C, Toerien A, et.al. Latex allergy--the Red Cross Children's Hospital  
451 experience. *S Afr med J*. 2001; 91: 750-1.
- 452 15. de Beers C, Cilliers J. Accurate diagnosis of latex allergy in hospital employees is cost-effective.  
453 *Curr Allergy Clin Immunol*. 2004; 91: 760-5.
- 454 16. Potter PC, Crombie I, Marian A, et.al. Latex allergy at Groote Schuur Hospital--prevalence,  
455 clinical features and outcome. *S Afri Med J*. 2001; 91: 760-5.
- 456 17. Department of Labour. Compensation of Occupational and Diseases Act no 130. South Africa:  
457 Pretoria, 1993.
- 458 18. Allmers H, Brehler R, Chen Z, et.al. Reduction of latex aeroallergens and latex-specific IgE  
459 antibodies in sensitized workers after removal of powdered natural rubber latex gloves in a hospital. *J*  
460 *Allergy Clin Immunol* . 1998; 102: 841-6.
- 461 19. Wrangsjö K, Boman A, Liden C, et.al. Primary prevention of latex allergy in healthcare--spectrum  
462 of strategies including the European glove standardization. *Contact dermatitis*. 2012; 66: 165-71.
- 463 20. Malerich PG, Wilson ML, Mowad CM. The effect of a transition to powder-free latex gloves on  
464 workers' compensation claims for latex-related illness. *Dermatitis*. 2008; 19: 316-8.
- 465 21. Baur X, Chen Z, Allmers H. Can a threshold limit value for natural rubber latex airborne allergens  
466 be defined? *J Allergy Clin Immunol*. 1998; 101: 24-7.
- 467 22. Hayes BB, Afshari A, Millecchia L, et.al. Evaluation of percutaneous penetration of natural  
468 rubber latex proteins. *Toxicol Sci* 2000; 56: 262-70.

- 1  
2  
3 469 23. Mabe DO, Singh TS, Bello B, et.al. Allergenicity of latex rubber products used in South African  
4 470 dental schools. *S Afri Med J* 2009; 99: 672-4.  
5 471 24. LaMontagne AD, Radi S, Elder DS, et.al. Primary prevention of latex related sensitisation and  
6 472 occupational asthma: a systematic review. *Occup Environ Med* 2006; 63: 359-64.  
7 473 25. Heederik D, Henneberger PK, Redlich CA. et.al.. Primary prevention: exposure reduction, skin  
8 474 exposure and respiratory protection. *Eur Respir Rev* 2012; 21: 112-24.  
9 475 26. Baur X, Sigsgaard T. The new guidelines for management of work-related asthma. *The Eur Respir*  
10 476 *J* 2012; 39: 518-9.  
11 477 27. Potter PC. Latex allergy--time to adopt a powder-free policy nationwide. *S Afri Med J* 2001; 91:  
12 478 746-8.  
13 479 28. Liss GM, Tarlo SM. Natural rubber latex-related occupational asthma: association with  
14 480 interventions and glove changes over time. *Am J Ind Med* 2001; 40: 347-53.  
15 481 29. Hunt LW, Kelkar P, Reed CE, et.al. Management of occupational allergy to natural rubber latex in  
16 482 a medical center: the importance of quantitative latex allergen measurement and objective follow-up. *J*  
17 483 *Allergy Clin Immunol* 2002; 110: S96-106.  
18 484 30. Schmid K, Christoph Broding H, Niklas D, et.al. Latex sensitization in dental students using  
19 485 powder-free gloves low in latex protein: a cross-sectional study. *Contact dermatitis* 2002; 47: 103-8.  
20 486 31. Clayton TH, Wilkinson SM. Contact dermatoses in healthcare workers: reduction in type I latex  
21 487 allergy in a UK centre. *Clin Exp Dermatol* 2005; 30: 221-5.  
22 488 32. Turjanmaa K, Palosuo T, Alenius H, et al. Latex allergy diagnosis: in vivo and in vitro  
23 489 standardization of a natural rubber latex extract. *Allergy* 1997; 52: 41-50.  
24 490 33. Morris A. ALLSA Position Statement: Allergen Skin-Prick Testing. *Curr Allergy Clin Immunol* 2006;  
25 491 90: 22-5.  
26 492 34. Smith AM, Amin HS, Biagini RE, et al. Percutaneous reactivity to natural rubber latex proteins  
27 493 persists in health-care workers following avoidance of natural rubber latex. *Clin Exp Allergy* 2007; 37:  
28 494 1349-56.  
29 495 35. Suli C, Parziale M, Lorini M, et.al. Prevalence and risk factors for latex allergy: a cross sectional  
30 496 study on health-care workers of an Italian hospital. *J Investig Allergol Clin Immunol* 2004; 14: 64-9.  
31 497 36. Blanco C. Latex-fruit syndrome. *Cur Allergy Asthma Rep* 2003; 3: 47-53.  
32 498 37. Porri F, Pradal M, Lemiere C, et al. Association between latex sensitization and repeated latex  
33 499 exposure in children. *Anesthesiology* 1997; 86: 599-602.  
34 500 38. Rueff F, Kienitz A, Schopf P, et al. Frequency of natural rubber latex allergy in adults is increased  
35 501 after multiple operative procedures. *Allergy* 2001; 56: 889-94.  
36 502 39. Brown RH, Hamilton RG, McAllister MA. How health care organizations can establish and  
37 503 conduct a program for a latex-safe environment. *Jt Comm J Qual Saf* 2003; 29: 113-23.  
38  
39  
40  
41  
42  
43  
44 504  
45  
46  
47 505  
48  
49  
50  
51  
52  
53  
54  
55  
56  
57  
58  
59  
60



506 **TABLES**507 **Table 1: Demographics and associated risk factors amongst latex exposed and unexposed**  
508 **healthcare workers at King Edward VIII Hospital, KwaZulu-Natal South Africa, (n=501)**509  
510

| Characteristic                              | Exposed<br>N (%) | Unexposed<br>N (%) |
|---------------------------------------------|------------------|--------------------|
| Number of participants                      | 337 (67.3)       | 164 (32.7)         |
| <b>Demographics</b>                         |                  |                    |
| Age (years)                                 |                  |                    |
| ≤30                                         | 30(8.9)          | 19(11.6)           |
| >30-40                                      | 121(35.9)        | 40(24.4)           |
| >40-50                                      | 101(29.9)        | 59(35.9)           |
| >50                                         | 85(25.2)         | 46(28.1)           |
| Duration of employment (years)              |                  |                    |
| ≤5                                          | 39(11.6)         | 28(17.1)           |
| >5-10**                                     | 135(40.1)        | 32(19.5)           |
| >10-15                                      | 49(14.5)         | 17(10.4)           |
| >15-20                                      | 24(7.1)          | 20(12.2)           |
| >20*                                        | 90(26.7)         | 67(40.9)           |
| Sex **                                      |                  |                    |
| Female                                      | 309(91.7)        | 95(57.9)           |
| Male                                        | 28(8.3)          | 69(42.1)           |
| Job Title (yes)                             |                  |                    |
| Administrative                              |                  | 164(100.0)         |
| Professional nurses                         | 123(36.5)        |                    |
| Enrolled nurses                             | 141(41.8)        |                    |
| Enrolled nursing assistants                 | 73 (21.7)        |                    |
| <b>Medical and Personal History</b>         |                  |                    |
| Personal history of Allergy Disease (yes)   | 147(43.6)        | 83(50.6)           |
| Family history of Allergy Disease (yes)     | 197(58.5)        | 102(62.2)          |
| Fruit allergy (yes)                         | 29(8.6)          | 9(5.5)             |
| Previous open surgery (yes)*                | 168(49.8)        | 61(37.2)           |
| Work-related allergy symptoms(yes)*         | 138(40.9)        | 52(31.7)           |
| Non-occupational latex exposure (yes)       | 161(47.8)        | 76(46.3)           |
| Latex sensitisation (yes)                   | 24(7.1)          | 5(3.1)             |
| Current latex allergy (yes)*                | 20(5.9)          | 3(1.8)             |
| <b>Chi square, *p&lt;0.05, **p&lt;0.001</b> |                  |                    |

511  
512  
513  
514  
515



**Table 2: Comparison of risk factors between latex sensitised (skin prick test positive) and non-sensitised (skin prick test negative) healthcare workers at King Edward VIII Hospital, KwaZulu-Natal South Africa (n=501)**

| Characteristics                                | Latex SPT +ve <sup>†</sup> (29)<br>N (%) | Latex SPT -ve <sup>††</sup> (472)<br>N (%) | 520<br>521<br>522 |
|------------------------------------------------|------------------------------------------|--------------------------------------------|-------------------|
| <b>Demographics</b>                            |                                          |                                            | 523               |
| Age (years.)                                   |                                          |                                            | 524               |
| ≤30                                            | 1 (3.5)                                  | 48(10.2)                                   | 525               |
| >30-40                                         | 13 (44.8)                                | 148(31.4)                                  | 526               |
| >40-50                                         | 8 (27.6)                                 | 152(32.2)                                  | 527               |
| >50                                            | 7 (24.1)                                 | 124(26.3)                                  | 528               |
| Duration of employment                         |                                          |                                            | 529               |
| ≤5                                             | 3(10.3)                                  | 64(13.6)                                   | 530               |
| >5-10                                          | 16(55.2)                                 | 151(31.9)                                  | 531               |
| >10-15                                         | 3(10.3)                                  | 63(13.4)                                   | 532               |
| >15-20                                         | 1(3.5)                                   | 43(9.1)                                    | 533               |
| >20                                            | 6(20.7)                                  | 151(31.9)                                  | 534               |
| Sex (yes)                                      |                                          |                                            | 535               |
| Male                                           | 5(17.2)                                  | 118(25.0)                                  | 536               |
| Female                                         | 24(82.8)                                 | 354(75.0)                                  | 537               |
| Job Title (yes)                                |                                          |                                            | 538               |
| Administrative                                 | 5(17.2)                                  | 159(33.7)                                  | 539               |
| Professional nurses                            | 5(17.2)                                  | 118(25.0)                                  | 540               |
| Enrolled nurses                                | 14(48.3)                                 | 127(26.9)                                  | 541               |
| Enrolled nursing assistants                    | 5(17.2)                                  | 68(14.4)                                   | 542               |
| <b>Latex Exposure</b>                          |                                          |                                            | 543               |
| Exposure status(yes)                           | 24 (82.8)                                | 313(66.3)                                  | 544               |
| Type of gloves                                 |                                          |                                            | 545               |
| None                                           | 5(17.2)                                  | 165(34.6)                                  | 546               |
| Exclusive powdered latex glove (yes)           | 2(6.9)                                   | 36(7.6)                                    | 547               |
| Exclusive powder free latex glove (yes)*       | 11(37.9)                                 | 77(16.3)                                   | 548               |
| Mixed (yes)                                    | 11(37.9)                                 | 198(41.9)                                  | 549               |
| <b>Medical and Personal History</b>            |                                          |                                            | 550               |
| Personal history of Allergy Disease (yes)      | 16(55.2)                                 | 214(45.3)                                  | 551               |
| Family history of Allergy Disease (yes)        | 18(62.1)                                 | 281(59.5)                                  | 552               |
| Fruit allergy (yes) *                          | 5(17.2)                                  | 33(6.9)                                    | 553               |
| Previous open surgery (yes)                    | 18(62.1)                                 | 211(44.7)                                  | 554               |
| Non-occupational latex exposure (yes)          | 12(41.4)                                 | 225(47.7)                                  | 555               |
| Reaction to other latex medical devices (yes)* | 3(10.3)                                  | 8(1.7)                                     | 556               |
| <b>Chi Square, *p&lt;0.05</b>                  |                                          |                                            | 557               |
| <b>†Latex Skin Prick Test Positive</b>         |                                          |                                            | 558               |
| <b>††Latex Skin Prick Test Negative</b>        |                                          |                                            | 559               |
|                                                |                                          |                                            | 560               |

561  
562  
563  
564

565 **Table 3: Crude Odds Ratios (OR) (95% CI) of demographics, exposure status, medical and personal**  
 566 **history and latex sensitisation and latex allergy amongst healthcare workers at King Edward VIII**  
 567 **Hospital, KwaZulu-Natal South Africa, (n=501)**

| Characteristics                                                                      | N=2<br>9 | Latex Sensitisation<br>OR (95%CI) | N=23 | LA#<br>OR (95%CI) | 569<br>570 |
|--------------------------------------------------------------------------------------|----------|-----------------------------------|------|-------------------|------------|
| <b>Demographics</b>                                                                  |          |                                   |      |                   |            |
| Age (years)                                                                          |          |                                   |      |                   | 571        |
| ≤30                                                                                  | 1        | 0.3(0.0-1.9)                      | 1    | 0.4(0.0-2.4)      | 572        |
| >30-40                                                                               | 13       | 1.8(0.8-3.7)                      | 11   | 2.0(0.9-4.6)      | 573        |
| >40-50                                                                               | 8        | 0.8(0.4-1.8)                      | 7    | 0.9(0.4-2.2)      | 574        |
| >50                                                                                  | 7        | 0.8(0.4-2.1)                      | 4    | 0.6(0.2-1.7)      | 575        |
| Duration of employment (years)                                                       |          |                                   |      |                   | 576        |
| <5                                                                                   | 3        | 0.7(0.2-2.4)                      | 3    | 0.9(0.3-3.2)      | 577        |
| 5-10                                                                                 | 16       | 2.6(1.2-5.5)*                     | 14   | 3.3(1.4-7.6)*     | 578        |
| >10-15                                                                               | 3        | 0.7(0.2-2.4)                      | 3    | 0.9(0.3-3.2)      | 579        |
| >15-20                                                                               | 1        | 0.4(0.0-2.1)                      | 1    | 0.5(0.0-2.8)      | 580        |
| >20                                                                                  | 6        | 0.5(0.2-1.4)                      | 2    | 0.2(0.0-0.8)      | 581        |
| Sex (yes)                                                                            |          |                                   |      |                   | 582        |
| Female                                                                               | 24       | 1.6(0.6-4.1)                      | 20   | 2.2(0.7-7.2)      | 583        |
| Job Title (yes)                                                                      |          |                                   |      |                   | 584        |
| Administrative                                                                       | 5        | 0.4(0.2-1.1)                      | 3    | 0.3(0.1-0.9)*     | 585        |
| Professional nurses                                                                  | 5        | 0.6(0.2-1.6)                      | 4    | 0.6(0.2-1.8)      | 586        |
| Enrolled nurses                                                                      | 14       | 2.5(1.2-5.3)*                     | 11   | 2.4(1.1-5.6)*     | 587        |
| Enrolled nursing assistants                                                          | 5        | 1.2(0.5-3.3)                      | 5    | 1.7(0.6-4.5)      | 588        |
| <b>Latex Exposure</b>                                                                |          |                                   |      |                   |            |
| Exposure status (yes)                                                                | 24       | 2.4(0.9-6.3)                      | 20   | 3.4(1.1-10.8)     | 589        |
| Type of gloves                                                                       |          |                                   |      |                   | 590        |
| None                                                                                 | 5        | 0.4(0.2-1.0)                      | 3    | 0.3(0.1-0.9)*     | 591        |
| Exclusive Powdered latex glove (yes)                                                 | 2        | 0.9(0.0-3.6)                      | 2    | 1.2(0.0-1.7)      | 592        |
| Exclusive Powder free latex glove (yes)                                              | 11       | 3.1(1.4-6.8)*                     | 10   | 3.1(1.7-9.1)*     | 593        |
| Mixed gloves(yes)                                                                    | 11       | 0.8(0.4-1.8)                      | 8    | 0.7(0.3-1.7)      | 594        |
| <b>Medical and Personal History</b>                                                  |          |                                   |      |                   |            |
| Personal history of Allergy Disease (yes)                                            | 16       | 1.4(0.7-3.1)                      | 12   | 1.3(0.5-2.9)      | 595        |
| Family history of Allergy Disease (yes)                                              | 18       | 1.1(0.5-2.4)                      | 14   | 1.1(0.5-2.4)      | 596        |
| Fruit allergy (yes)                                                                  | 5        | 2.8(1.0-7.5)                      | 5    | 3.7(1.4-10.5)*    | 597        |
| Previous open surgery (yes)                                                          | 18       | 1.1(0.5-2.4)                      | 14   | 1.5(0.7-3.1)      | 598        |
| <b>Chi square, *p&lt;0.05</b>                                                        |          |                                   |      |                   |            |
| <b>†Latex Skin Prick Test Positive</b>                                               |          |                                   |      |                   |            |
| <b>‡Latex Skin Prick Test Positive and work related clinical symptoms of allergy</b> |          |                                   |      |                   |            |

591

592

593

**Table 4: Multivariate analysis of demographics, medical and personal history, exposure history and latex sensitisation (LS)<sup>†</sup> and latex allergy (LA)<sup>#</sup> amongst healthcare workers at King Edward III Hospital, KwaZulu-Natal South Africa, (n=501)**

| Characteristics                              | MODEL I* (n=501) |               | MODEL II** (n=501) |               | MODEL III***(n=202) |               | MODEL IV****(n=252) |               |
|----------------------------------------------|------------------|---------------|--------------------|---------------|---------------------|---------------|---------------------|---------------|
|                                              | LS OR (95%CI)    | LA OR (95%CI) | LS OR (95%CI)      | LA OR (95%CI) | LS OR (95%CI)       | LA OR (95%CI) | LS OR (95%CI)       | LA OR (95%CI) |
| <b>Demographics</b>                          |                  |               |                    |               |                     |               |                     |               |
| Sex (female)                                 | 0.9(0.2-2.7)     | 1.1(0.3-4.4)  | 0.9(0.3-2.7)       | 1.1(0.3-4.5)  | 0.3(0.0-1.8)        | 0.3(0.0-3.1)  | 2.5(0.5-12.2)       | 2.5(0.5-12.2) |
| Duration of employment (years)               | 0.9(0.9-1.0)     | 0.9(0.8-0.9)  | 0.9(0.9-1.0)       | 0.9(0.8-0.8)  | 0.9(0.9-1.8)        | 0.7(0.5-1.0)  | 0.9(0.9-1.0)        | 0.9(0.9-1.0)  |
| <b>Latex Exposure</b>                        |                  |               |                    |               |                     |               |                     |               |
| Exposure status(yes)                         | 2.2(0.7-6.7)     | 2.6(0.7-9.8)  |                    |               |                     |               |                     |               |
| Type of gloves                               |                  |               |                    |               |                     |               |                     |               |
| None                                         |                  |               | 1                  | 1             |                     |               |                     |               |
| Exclusive lightly powdered latex glove (yes) |                  |               | 1.6(0.3-9.8)       | 2.6(0.4-17.7) |                     |               |                     |               |
| Exclusive Powder free latex glove (yes)      |                  |               | 4.2(1.2-14.1)      | 5.1(1.2-21.2) |                     |               |                     |               |
| Mixed gloves (yes)                           |                  |               | 1.7(0.5-5.6)       | 1.7(0.4-7.1)  |                     |               |                     |               |

|                                                      |               |              |              |              |               |                |              |               |
|------------------------------------------------------|---------------|--------------|--------------|--------------|---------------|----------------|--------------|---------------|
| Pairs of Powdered latex Gloves in the last 7 days    |               |              |              |              | 1.1(1.0-1.2)  | 1.2(1.0-1.4)   |              |               |
| Pairs of Powder Free Latex Gloves in the last 7 days |               |              |              |              |               |                | 1.0(0.9-1.1) | 1.0(0.9-1.1)  |
| <b>Personal and Medical History</b>                  |               |              |              |              |               |                |              |               |
| Personal history of allergy disease (yes)            | 1.5(0.7-3.3)  | 1.4(0.6-3.2) | 1.5(0.7-3.3) | 1.3(0.6-3.2) | 1.4(0.3-6.8)  | 1.6(0.2-11.6)  | 1.0(0.4-2.9) | 0.9(0.3-2.8)  |
| Family history of allergy disease (yes)              | 1.0(0.45-2.2) | 0.9(0.4-2.2) | 1.1(0.5-2.3) | 0.9(0.4-2.3) | 0.4(0.1-1.9)  | 0.5(0.1-3.6)   | 0.7(0.2-2.0) | 0.8(0.3-2.7)  |
| Fruit allergy (yes)                                  | 2.3(0.8-6.7)  | 3.1(1.1-9.2) | 2.2(0.8-6.5) | 3.0(0.9-9.1) | 5.0(0.4-56.9) | 9.7(0.6-163.0) | 1.7(0.3-8.5) | 2.0(0.4-10.4) |
| Previous open surgery (yes)                          | 2.0(0.9-4.4)  | 1.9(0.8-4.6) | 2.1(0.9-4.6) | 1.9(0.8-4.7) | 1.4(0.3-7.4)  | 1.2(0.1-11.1)  | 1.1(0.4-3.2) | 1.2(0.4-3.8)  |

†Latex Skin Prick Test Positive

‡Latex Skin Prick Test Positive and work related clinical symptoms of allergy

\*Model included latex glove exposure status

\*\*Model included type of gloves

\*\*\*Model included number of pairs of powdered latex gloves

\*\*\*\*Model included number of pairs of powder free latex gloves

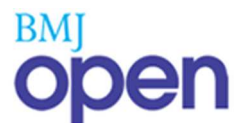

**The prevalence of latex sensitisation and allergy and associated risk factors amongst health care workers using hypoallergenic latex gloves at King Edward VIII hospital, KwaZulu-Natal South Africa: A cross sectional study**

|                                 |                                                                                                                                                                               |
|---------------------------------|-------------------------------------------------------------------------------------------------------------------------------------------------------------------------------|
| Journal:                        | <i>BMJ Open</i>                                                                                                                                                               |
| Manuscript ID:                  | bmjopen-2013-002900.R2                                                                                                                                                        |
| Article Type:                   | Research                                                                                                                                                                      |
| Date Submitted by the Author:   | 18-Oct-2013                                                                                                                                                                   |
| Complete List of Authors:       | Phaswana, Shumani; University of KwaZulu Natal, Occupational and Environmental Health<br>Naidoo, Saloshni; University of KwaZulu Natal, Occupational and Environmental Health |
| <b>Primary Subject Heading</b>: | Occupational and environmental medicine                                                                                                                                       |
| Secondary Subject Heading:      | Immunology (including allergy), Occupational and environmental medicine, Epidemiology                                                                                         |
| Keywords:                       | Latex, Hypoallergenic, Healthcare workers, South Africa                                                                                                                       |
|                                 |                                                                                                                                                                               |

SCHOLARONE™  
Manuscripts

1  
2  
3 1 **The prevalence of latex sensitisation and allergy and associated risk factors among healthcare**  
4 2 **workers using hypoallergenic latex gloves at King Edward VIII Hospital, KwaZulu-Natal South**  
5 3 **Africa: A cross sectional study**  
6  
7  
8

9 4  
10 5 S M Phaswana<sup>1</sup>, S Naidoo<sup>1</sup>  
11

12 6 <sup>1</sup>Discipline of Occupational and Environmental Health, School of Nursing and Public Health,  
13 7 University of kwaZulu Natal, South Africa  
14  
15

16 8  
17  
18 9 Contact Details for Corresponding Author  
19

20 10 Dr Shumani Makwarela Phaswana  
21

22 11 306 Valhaven  
23

24 12 80 Cromwell Road  
25

26 13 Glenwood  
27

28 14 Durban  
29

30 15 4001  
31

32 16 E-mail: [shuma8008@yahoo.com](mailto:shuma8008@yahoo.com)  
33

34 17 Tel nr: 031 260 4507  
35

36 18 Fax nr: 031 260 4663  
37

38 19  
39  
40  
41 20 Keywords: Latex, hypoallergenic, healthcare workers, South Africa  
42

43 21 Word Count:  
44

45 22 Abstract: 299  
46

47 23 Body: 4,359  
48  
49  
50  
51  
52  
53  
54  
55  
56 26  
57  
58  
59  
60

1  
2  
3 **27 ABSTRACT**  
4

5  
6 **28 Objectives**  
7

8  
9 The present study describes latex sensitisation and allergy prevalence and associated factors among  
10  
11 healthcare workers using hypoallergenic latex gloves at King Edward VIII Hospital in KwaZulu-Natal  
12  
13 South Africa.  
14

15  
16  
17 **32 Design**  
18

19  
20 Cross sectional study  
21

22  
23 **34 Setting**  
24

25  
26 A tertiary hospital in eThekweni municipality, KwaZulu Natal, South Africa  
27

28  
29 **36 Participants**  
30

31  
32 600 healthcare workers were randomly selected and 501(337 exposed and 164 unexposed) participated.  
33  
34 Participants who were pregnant, less than one year of work as healthcare worker and history of  
35  
36 anaphylactic reaction were excluded from the study.  
37

38  
39  
40 **40 Primary and secondary outcome measures**  
41

42  
43 Latex sensitisation and latex allergy were the outcome of interest and they were successfully measured  
44

45  
46 **42 Results**  
47

48  
49 Prevalence of latex sensitisation and allergy was observed among exposed workers (7.1% and 5.9%) and  
50  
51 unexposed workers (3.1% and 1.8%). Work related allergy symptoms were significantly higher in  
52  
53 exposed workers (40.9%,  $p < 0.05$ ). Duration of employment was inversely associated with latex allergy  
54  
55 (OR: 0.9; 95% CI: 0.8-0.9). The risk of latex sensitisation (OR: 4.2; 95% CI: 1.2-14.1) and allergy (OR:  
56  
57 5.1; 95% CI: 1.2-21.2) increased with exclusive use of powder-free latex gloves. A dose –response  
58  
59  
60

1  
2  
3 48 relationship was observed for powdered latex gloves (OR: 1.1; 95% CI: 1.0-1.2). Atopy (OR: 1.5; 95%  
4  
5 49 CI: 0.7-3.3 and OR: 1.4; 95% CI: 0.6-3.2) and fruit allergy (OR: 2.3; 95% CI: 0.8-6.7 and OR: 3.1; 95%  
6  
7 50 CI: 1.1-9.2) also increased the risk of latex sensitisation and allergy.  
8  
9

## 10 51 **Conclusion**

11  
12  
13  
14 52 This study adds to previous findings that healthcare workers exposed to hypoallergenic latex gloves are at  
15  
16 53 risk for developing latex sensitisation highlighting its importance as an occupational hazard in healthcare.  
17  
18 54 More research is needed to identify the most cost effective way of implementing a latex free environment  
19  
20 55 in resource limited countries, such as South Africa. In addition more cohort analysis is required to better  
21  
22 56 understand the chronicity of illness and disability associated with latex allergy.  
23  
24  
25  
26 57

### 28 **ARTICLE SUMMARY**

#### 30 **ARTICLE FOCUS**

- 32 ➤ The use of hypoallergenic latex gloves has been adopted as policy in different healthcare  
33 settings globally.
- 34 ➤ However, information with regard to their use and the development of latex sensitisation  
35 and allergy among exposed healthcare workers is limited.
- 36 ➤ We hypothesised that there is latex sensitization and allergy in healthcare workers using  
37 hypoallergenic latex gloves in a South African hospital.

#### 40 **KEY MESSAGE**

- 42 ➤ In the presence of powder free hypoallergenic gloves, latex sensitisation and latex allergy is  
43 still an important occupational health effect in healthcare workers.
- 44 ➤ Healthcare workers should be continuously monitored for the development of latex  
45 sensitisation and allergy.
- 46 ➤ There is a need for a national policy accompanied by clear implementation plans as well as  
47 sustainable education and training programmes to address latex sensitisation and allergy  
48 among HCWs.



**STRENGTH AND LIMITATIONS**

- Strength of the study included the presence of a control group providing a background prevalence of latex sensitisation in this population and random selection of participants which minimised the potential of participant bias that arises with a volunteer approach.
- This study was limited by the cross sectional study design as it only allowed for the determination of the prevalence of latex sensitisation; recall bias with regard to the number of gloves used in the past 7 working days and the self-reporting of personal and family atopic disorders may have resulted in the misclassification of exposure and atopy respectively.

58

59

60

**What this paper adds**

In the presence of powder free hypoallergenic gloves, latex sensitisation and latex allergy is still an important occupational health hazard in healthcare workers

Healthcare workers should be continuously monitored for the development of latex sensitisation and allergy

There is a need for a national policy accompanied by clear implementation plans as well as sustainable education and training programmes to address latex sensitisation and allergy among HCWs

68

69

70

71

72

73

## 74 INTRODUCTION

75 Latex allergy (LA) as an occupational disease among healthcare workers (HCWs) gained  
76 recognition after Nutter published a case report of contact urticaria in a HCW in 1979.<sup>1</sup> The  
77 increase in prevalence coincided with the emergence of the Human Immunodeficiency Virus/  
78 Acquired immunodeficiency syndrome (HIV/AIDS) epidemic and the introduction of “universal  
79 precautions” in the healthcare industry which had resulted in the increased use of latex gloves  
80 among HCWs.<sup>2</sup>

81 Latex gloves are preferred due to their superior barrier and physical properties as compared to  
82 the non-latex gloves.<sup>3</sup> International epidemiological studies have reported the prevalence of latex  
83 allergy among HCWs to range between 2-22% depending on the population and diagnostic  
84 methods used.<sup>4-11</sup> The prevalence in the general population has been reported to range between  
85 1-6%.<sup>12, 13</sup> In South Africa studies amongst HCWs reported a latex sensitisation prevalence of  
86 between 2.7 to 20.8%.<sup>14-16</sup> Latex allergy in HCWs is a compensable disease in South Africa in  
87 terms of the Compensation of Occupational Injuries and Diseases Act No. 130 of 1993.<sup>17</sup>

88 Powdered latex gloves were identified as an important risk factor for latex sensitisation and  
89 allergy in HCWs as they were found to contain high allergenic protein content.<sup>18</sup> Following these  
90 findings, hypoallergenic gloves with low allergen content namely, low powdered and powder  
91 free latex gloves were introduced. The European definition of powder free gloves is gloves with  
92 powder content not exceeding 2 mg per glove and leachable latex protein which is as low as is  
93 reasonably practical.<sup>19</sup>

94 Hypoallergenic gloves have been associated with reduced latex aeroallergen concentrations,  
95 reduced conversion rates and a subsequent decrease in clinic visits, and compensation claims for

1  
2  
3 96 latex induced occupational asthma and allergic contact dermatitis among HCWs.<sup>18, 20</sup> As much as  
4  
5  
6 97 the use of low or powder free gloves has been shown to reduce latex related symptoms, other  
7  
8 98 studies have shown that exposed HCWs still exhibit symptoms at very low levels of measureable  
9  
10 99 airborne latex allergens.<sup>21</sup> Most studies have reported on the airborne levels and inhalational  
11  
12 100 route of exposure hence the recommendation on low powdered or powder free latex gloves.  
13  
14  
15 101 There is little consideration given to the dermal route of exposure despite the fact that exposure  
16  
17 102 is as a result of direct contact in these instances.<sup>22</sup> Eliminating the cornstarch powder only  
18  
19 103 removed the carrier and not the source of allergen which is in the latex itself. Therefore workers  
20  
21 104 using powder free gloves are still exposed to the allergenic content of latex gloves. It has been  
22  
23 105 shown that different brands from different suppliers contain differing levels of protein due to a  
24  
25 106 lack of standards in latex glove manufacture.<sup>23</sup> A South African study reported that some powder  
26  
27 107 free latex gloves were found to have high allergenic protein content.<sup>23</sup> HCWs using these gloves  
28  
29 108 are exposed via direct dermal contact and are at risk for developing latex sensitization which  
30  
31 109 maybe asymptomatic and if exposure continues they can later develop latex allergy which  
32  
33 110 presents with clinical manifestations.

34  
35  
36  
37  
38  
39  
40 111 While it is important to diagnose and manage an individual worker with latex allergy in the early  
41  
42 112 stages of the disease, complete control of hazardous substance in the workplace is equally if not  
43  
44 113 more important. While a latex free work environment would be a preferred control strategy,  
45  
46 114 substitution of powdered latex gloves with powder free gloves was shown to be cost effective  
47  
48 115 and associated with improved clinical outcome.<sup>20, 24-26</sup> As a result this was adopted as the most  
49  
50 116 reasonable and practical approach in addressing the problem of latex allergy among HCWs both  
51  
52 117 internationally and to some extent nationally.<sup>27-29</sup> This has proven to reduce latex induced  
53  
54 118 clinical outcomes. Even with this intervention, studies in Western countries such as Germany  
55  
56  
57  
58  
59  
60

1  
2  
3 119 and the UK have shown that the risk of latex sensitisation still exists and more needs to be done  
4  
5  
6 120 to protect HCWs.<sup>30, 31</sup>  
7  
8

9 121 The current study described the prevalence of latex sensitisation and allergy among healthcare  
10  
11 122 workers who use hypoallergenic powder free and lightly powdered latex gloves.  
12  
13

## 14 123 **METHODS**

### 15 124 **Study design and population**

16  
17  
18 125 This was a cross sectional study conducted between July 2011 and January 2012. The study  
19  
20  
21  
22 126 location was King Edward VIII hospital, the second largest hospital in the Southern hemisphere,  
23  
24  
25 127 providing regional and tertiary services to the whole of KwaZulu-Natal (KZN) and the Eastern  
26  
27  
28 128 Cape Province in South Africa. It has a bed status of 1300 and has a workforce of 2400. The  
29  
30  
31 129 hospital was chosen due to the large workforce with different departments, and the policy of  
32  
33  
34 130 using both powder free and low powdered latex gloves for approximately 10 years.  
35  
36

37 131 The study population was limited to HCWs currently employed at King Edward VIII Hospital  
38  
39 132 for more than 12 months. HCWs were defined as all personnel employed in the hospital.  
40  
41

42 133 The prevalence of latex sensitization in HCWs using powdered latex gloves in the Western Cape  
43  
44 134 Province was 11.9% in 2001.<sup>16</sup> We expected the prevalence at King Edward VIII hospital to be  
45  
46  
47 135 less than the 11.9% observed in the Western Cape Province due to the adoption of a  
48  
49  
50 136 hypoallergenic latex glove policy in 2001. Using EPI Info calculator version 3.04.04., it was  
51  
52  
53 137 assumed that 50% of sensitised workers have remained sensitised despite the introduction of  
54  
55 138 hypoallergenic latex gloves 10 years prior. Using an expected latex sensitization prevalence of  
56  
57 139 6% for the exposed group and the prevalence among the general population being reported as  
58  
59  
60

1  
2  
3 140 less than 1% the required sample size was calculated to be 585 participants 2 exposed  
4  
5  
6 141 participants for every 1 non-exposed participant (exposed =390; unexposed =195). HCWs were  
7  
8 142 considered to be exposed if they were likely to use gloves. Unexposed HCWs were drawn from  
9  
10 143 the administrative staff of the hospital.  
11  
12

### 14 144 **Questionnaire**

15  
16  
17 145 We used an adaptation of the questionnaire used in an epidemiological study conducted at  
18  
19 146 Groote Schuur in 2001<sup>16</sup> with permission from Professor Paul Potter, Allergology Unit, Medical  
20  
21 147 School, University of Cape Town. The questionnaire containing open and closed ended questions  
22  
23 148 was adapted to include items on exposure assessment. The questionnaire was administered by a  
24  
25 149 trained research assistant immediately prior to the skin prick test. The questionnaire collected  
26  
27 150 data on the participants' demographics, personal risk factors, latex exposure assessment, clinical  
28  
29 151 manifestations of latex sensitization (dermal and respiratory) and history of previous reactions  
30  
31 152 suggestive of latex allergy.  
32  
33  
34  
35  
36

### 37 153 **Exposure Assessment**

#### 40 154 *Individual Exposure*

41  
42  
43  
44 155 Individual latex exposure was determined by the type of gloves used, number of gloves used per  
45  
46 156 day, and duration of glove use. The information was limited to 7 working shifts/days prior to the  
47  
48 157 interview.  
49  
50

#### 52 158 *Departmental Exposure*

1  
2  
3 159 Departmental exposure was defined as glove usage in the past 12 months (01 January 2011-31  
4  
5  
6 160 December 2011). The overall departmental exposure was obtained by reviewing monthly glove  
7  
8 161 usage by each department from the stock room register. This was used to estimate the annual  
9  
10 162 exposure for employees who had rotated through different departments in the past 12 months.  
11  
12 163 Non sterile latex gloves are distributed throughout the clinical departments while a high  
13  
14 164 proportion of sterile gloves are distributed to labour ward, theatre, surgical wards and outpatient  
15  
16 165 departments. Glove type was defined as powdered and powder-free and latex free based on the  
17  
18 166 previous literature.<sup>23, 32</sup>  
19  
20  
21  
22

### 23 167 **Skin prick test (SPT)**

24  
25  
26 168 The SPT was conducted using the Stallergenes kit.<sup>32</sup> It was performed in a room with access to  
27  
28 169 emergency resuscitation services by a trained research assistant. The research assistant and  
29  
30 170 principal investigator were trained on 2 separate occasions. The test was performed on the inner  
31  
32 171 aspect of the participants' forearms, between the wrist and the elbow on normal skin. A positive  
33  
34 172 and negative control were performed using histamine (0.61% concentration of phenol) and  
35  
36 173 buffered normal saline solution respectively on the same arm and they were 3 cm apart to  
37  
38 174 prevent cross contamination. The protein concentration of the latex extract was 500µg/ml and the  
39  
40 175 solution was applied as it was with no further dilutions. After 15-20 minutes subsequent to  
41  
42 176 puncturing the skin, the SPT reaction wheal and flare was outlined by a black ink and clear tape  
43  
44 177 was used to transfer the outline from skin to the results sheet by the trained research assistant or  
45  
46 178 principal investigator.<sup>33</sup> A positive result was indicated by a mean wheal diameter measuring 3  
47  
48 179 mm or greater than the negative control. Results were recorded on a standardized result sheet.  
49  
50  
51 180 The research assistant's test performance was audited by the principal investigator at regular  
52  
53 181 intervals to ensure correctness of technique and interpretation of the results.  
54  
55  
56  
57  
58  
59  
60

1  
2  
3 182 Informed signed consent was obtained from all the participants prior to participation. They had  
4  
5 183 the option of participating in the questionnaire interview and the SPT or refusing the SPT. The  
6  
7  
8 184 study protocol was approved by the Biomedical Research Ethics Committee of the University of  
9  
10 185 KwaZulu-Natal (BE048/11). Permission to conduct the study was also obtained from the KZN  
11  
12 186 Provincial Department of Health and King Edward VIII hospital management.

### 16 187 **Statistical analysis**

18 188 Data was captured in Excel and analysed in Stata Version 11. Frequencies and medians with  
19  
20 189 ranges were presented for categorical and continuous variables respectively. The Chi-square and  
21  
22 190 the Kruskal-Wallis test were used to test for significant associations between categorical and  
23  
24 191 continuous variables and the dependent variables under study on bivariate analysis, respectively.

25  
26 192 Logistic regression was used to test for significant associations between independent and  
27  
28 193 dependent variables on multivariate analysis. The dependent variables used in the regression  
29  
30 194 analysis were: Latex sensitisation, which was defined as having a SPT wheal of  $\geq 3$ mm to latex  
31  
32 195 extract; Latex allergy (LA) was defined as being SPT positive and a report of having any one or  
33  
34 196 more of the listed work related clinical symptoms namely itchy eyes, red eyes, runny eyes, runny  
35  
36 197 nose, itchy nose, sneezing, coughing, tight chest, wheezing, itchy skin, skin rash or dizziness.

37  
38 198 Independent variables that were considered for analysis were as follows: Age (yrs.) and sex,  
39  
40 199 duration of employment, job title, current department employed in, type of gloves used, number  
41  
42 200 of pairs of gloves used per day, self reported and family history of atopy, food allergy and  
43  
44 201 previous history of open surgery and number of surgical procedures. In the multivariate analysis,  
45  
46 202 age was omitted due to collinearity with duration of employment. Departmental glove  
47  
48 203 consumption was omitted as this only indicated annual distribution of gloves per department and  
49  
50  
51  
52  
53  
54  
55  
56  
57  
58  
59  
60

1  
2  
3 204 not necessarily employees' exposure since enrolled nursing assistants and enrolled nurses are  
4  
5 205 rotated through different departments in any given year. The number of pair of gloves was used  
6  
7  
8 206 as an indicator of individual latex glove exposure. The variable number of pairs of gloves used  
9  
10 207 and duration of employment were retained as continuous variables in the multivariate model.  
11  
12 208 Fractional polynomial and a fractional plot was used to visualise the dose-response relationship  
13  
14 209 of these continuous exposure variables.  
15  
16  
17  
18

## 19 **RESULTS**

### 22 **Participant Demographics**

23  
24  
25 212 Sixty five HCWs refused to participate in the study. Among the 520 HCWs who responded to  
26  
27 213 the invitation there was an overall participation rate of 85.5 % (n=501) with 3.6% (n=19)  
28  
29 214 refusing SPT. There was no significant difference between those refusing SPT and those who  
30  
31 215 had the SPT with respect to latex exposure status, age, sex and duration of employment.  
32  
33  
34  
35

36 216 The median age of participants was 42.2 years (range: 22 years-65 years) with the greater  
37  
38 217 proportion of them being females. The median duration of employment was 10.9 years (range: 1  
39  
40 218 year-42 years) with the majority of exposed participants having worked as a HCW for < 10  
41  
42 219 years. Most unexposed healthcare workers had been employed for > 20 years. Personal and  
43  
44 220 family history of allergy was more prevalent among unexposed HCWs while exposed HCWS  
45  
46 221 reported a higher prevalence of a fruit allergy and history of previous surgery (Table 1).  
47  
48  
49  
50

### 51 **Prevalence of Latex Sensitisation and Allergy**

52  
53  
54 223 The overall prevalence of latex sensitisation and latex allergy were 5.9% (n=29) and 4.6%  
55  
56 224 (n=23) respectively. Although the difference was not significant, the prevalence of latex  
57  
58  
59  
60



1  
2  
3 225 sensitisation was higher among the exposed group (7.1%) as compared to the unexposed group  
4  
5  
6 226 (3.1%). Latex allergy was significantly higher in the exposed group than unexposed group (5.9%  
7  
8 227 vs 1.8%,  $p=0.04$ ). There was a significant difference in the work related allergy symptoms  
9  
10 228 between exposed and unexposed workers (40.9% vs. 31.7%,  $p=0.04$ ) (Table 1). Symptoms that  
11  
12 229 were significantly associated with latex sensitisation were skin rash ( $p< 0.000$ ), itchy skin  
13  
14  
15 230 ( $p=0.001$ ), runny nose ( $p=0.004$ ), red eyes ( $p=0.01$ ) and itchy eyes ( $p=0.01$ ).  
16  
17

18  
19 231 The prevalence of latex sensitization was higher among those who were exposed and those with  
20  
21 232 employment duration of < 10yrs. Although the prevalence of latex sensitisation was lower  
22  
23 233 among participants < 30 years of age, there was no significant variation with age or sex. There  
24  
25 234 was a significant difference ( $p=0.04$ ) in the prevalence of fruit allergy between those participants  
26  
27  
28 235 with latex sensitisation (17.2%) and unsensitised participants (6.9%) The exclusive use of  
29  
30 236 powder free latex gloves was found to be significantly ( $p=0.003$ ) higher among the participants  
31  
32  
33 237 who had latex sensitisation. There was equal distribution of powdered and powder free latex  
34  
35 238 gloves among those who reported the use of mixed gloves. The prevalence of reporting previous  
36  
37 239 open surgery and use of other non- occupational exposure latex containing material did not vary  
38  
39  
40 240 significantly between those who had latex sensitisation and those who were unsensitised. There  
41  
42 241 was a significantly higher prevalence of reporting allergic reactions when handling other latex  
43  
44 242 containing medical equipment among participants with latex allergy as compared to unsensitised  
45  
46  
47 243 participants (10.3% vs 1.7%,  $p=0.002$ ) (Table 2).  
48  
49

50 244 **Crude association of demographics, exposure status, medical and personal history and latex**  
51  
52 245 **sensitisation, latex allergy**  
53  
54  
55  
56  
57  
58  
59  
60

1  
2  
3 246 Latex exposure was significantly associated with latex allergy (OR: 3.4; 95% CI: 1.1-10.8).  
4  
5  
6 247 Working as a HCW for 5-9 years was significantly associated with latex sensitisation (OR: 2.6;  
7  
8 248 95% CI: 1.2-5.5) and latex allergy (OR: 3.3; 95% CI: 1.4-7.6), respectively. Employment  
9  
10 249 duration as a HCW for >20 years was protective against latex allergy (OR: 0.2; 95% CI: 0.0-0.8).  
11  
12 250 In comparison with unexposed workers, working as an enrolled nurse was significantly  
13  
14 251 associated with both latex sensitisation (OR: 2.5; 95% CI: 1.2-5.3) and latex allergy (OR: 2.4;  
15  
16 252 95% CI: 1.1-5.6). The exclusive use of powder free latex gloves was significantly associated  
17  
18 253 with latex sensitisation (OR: 3.1; 95% CI: 1.4-6.8) and latex allergy (OR: 3.1; 95% CI: 1.7-9.1).  
19  
20 254 Powdered and powder free latex gloves were equally distributed among those who reported the  
21  
22 255 use of mixed gloves. The annual consumption of pairs of gloves per HCW by department was  
23  
24 256 ranked and grouped into tertiles. Although medical and surgical wards had low and moderate  
25  
26 257 pairs of gloves consumption per HCW, these wards had the highest proportion of workers with  
27  
28 258 latex sensitisation (n=6, 20.0% each). However the relation was only significant for those who  
29  
30 259 reported the medical ward as being the current department in which they worked (p=0.01). The  
31  
32 260 proportions for powdered latex glove use were 71% and 69% in medical and surgical wards,  
33  
34 261 respectively and this was not statistically significant. Exposure to other latex containing medical  
35  
36 262 devices was not significantly different from what was reported in other wards. There was no  
37  
38 263 significant association between reported personal history of allergy disease, latex sensitisation  
39  
40 264 and latex allergy. Fruit allergy was significantly associated with latex allergy (OR: 3.7; 95%:  
41  
42 265 1.4-10.4) (Table 3). Listed fruits were evaluated for their independent association with latex  
43  
44 266 sensitisation. Avocado (OR: 12.3; 95% CI: 5.1-29.6) and others (OR: 5.1; 95% CI: 2.1-11.8)  
45  
46 267 which included pineapple and orange showed significant associations with latex sensitisation  
47  
48 268 (data not shown).  
49  
50  
51  
52  
53  
54  
55  
56  
57  
58  
59  
60

## 269 **Multivariate analysis**

270 While latex exposure had estimates of the OR above 2, there was no significant association with  
271 latex sensitisation and latex allergy. Duration of employment was found to be inversely  
272 associated with latex allergy in models I and II. The exclusive use of powder free latex gloves  
273 was significantly associated with latex sensitisation (OR: 4.2; 95% CI: 1.2-14.1) and latex  
274 allergy (OR: 5.1; 95%CI: 1.2-21.2) on multivariate analysis. This significant association  
275 disappeared when examining the number of pairs of powder free gloves used in the last 7 days. A  
276 weak association was observed for the number of pairs of powdered latex gloves used in the last  
277 7 days with both latex sensitisation and latex allergy (model III and IV). Further analysis of  
278 duration of employment and number of pairs of gloves using fractional polynomial failed to  
279 demonstrate significant dose-response relationship with either latex sensitisation or latex allergy.  
280 Duration of employment showed significant ( $p=0.000$ ) dose-response relationship when  
281 analysed using using penalised spline with degree of freedom =2 (Figure1). There was a  
282 significant association between fruit allergy and latex allergy in model I (OR: 3.1; 95% CI: 1.1-  
283 9.2) (Table 4).

## 284 **DISCUSSION**

285 This is an important study for South African HCWs as it examined the risk of latex sensitisation  
286 in a group of workers exposed to hypoallergenic latex gloves. As previously mentioned there has  
287 been no literature documenting the prevalence of latex sensitisation among South African HCWs  
288 using hypoallergenic lightly powdered or powder-free latex gloves. The prevalence of latex  
289 sensitisation among exposed HCWs (7.1%) in this study is comparable to findings among HCWs  
290 in another South African hospital.<sup>14</sup> However it was considerably lower than the 11.9%  
291 prevalence reported by Potter in the same year.<sup>16</sup> While a substantial number of participants

1  
2  
3 292 (37%) reported work related allergy symptoms, only 4.6% met our definition of latex allergy.  
4

5 293 The important symptoms associated with latex sensitisation were skin rash, itchy skin, runny  
6  
7  
8 294 nose, red and itchy eyes in keeping with previous studies. Elimination of powdered latex gloves  
9  
10 295 has shown a reduction in the concentration of aeroallergens in the operating room with the low  
11  
12 296 prevalence of latex allergy in our study population.  
13

14  
15  
16 297 Although the relationship was weak, this study showed that the risk of latex sensitisation  
17  
18 298 decreases with duration of employment. The healthy worker effect is a likely explanation of this  
19  
20 299 finding. Prior to availability of hypoallergenic latex gloves, workers who had developed latex  
21  
22 300 allergy may have left employment or they may have changed their career path and moved into a  
23  
24 301 more administrative or managerial role with no contact with latex gloves. Furthermore new  
25  
26 302 employees are only sensitised and have not yet manifested clinical symptoms and they continue  
27  
28 303 using latex gloves. On the other hand senior HCWs may have been sensitised during their earlier  
29  
30 304 years of employment and as a result they either moved to departments with less exposure to latex  
31  
32 305 gloves or deliberately avoid latex containing products and therefore exhibit less latex related  
33  
34 306 symptoms. Moreover, the introduction of hypoallergenic gloves 10 years prior to the study may  
35  
36 307 explain the reduced sensitisation in senior HCWs as demonstrated in the study by Smith et al in  
37  
38 308 2007. The published literature has been inconsistent in reporting the association between  
39  
40 309 duration of employment and latex sensitisation. Although latex is one of the best studied  
41  
42 310 allergens, no exposure response studies have been published with measured latex allergen levels.  
43  
44 311 In addition, studies have demonstrated variation in allergen content of different gloves. These  
45  
46 312 may lead to discrepancies in the literature with regard to the role of duration of employment as a  
47  
48 313 surrogate measure of exposure.  
49  
50  
51  
52  
53  
54  
55  
56  
57  
58  
59  
60

1  
2  
3 314 In our study HCWs who exclusively used powdered free latex gloves had a 4 times greater odds  
4  
5  
6 315 of developing latex sensitisation. The fact that HCWs with latex sensitisation or allergy work  
7  
8 316 more often with powder free latex gloves is indicative of reverse causality because of symptoms.  
9  
10 317 Moreover the background prevalence of latex sensitisation in this study was relatively higher  
11  
12 318 (3.5%) than previously reported prevalence in the general population by Bousquet et al.<sup>13</sup> Studies  
13  
14 319 have shown that some of these “hypoallergenic” latex gloves actually contain high levels of  
15  
16 320 allergens which can be release into the environment with aggressive manipulation.<sup>23</sup> Some of the  
17  
18 321 sensitised HCWs may have been sensitised before the hospital implemented a hypoallergenic  
19  
20 322 latex glove policy. Also Smith et al showed that complete avoidance of powdered latex glove can  
21  
22 323 result in the reduction or no change in measurable IgE antibodies.<sup>34</sup> A study in Germany reported  
23  
24 324 a high prevalence of 8% among 226 dental students who had only been exposed to exclusive  
25  
26 325 powder free latex gloves.<sup>30</sup> Similarly in the UK despite a total ban on powdered latex gloves  
27  
28 326 Clayton found a 10% prevalence of latex sensitisation in HCWs.<sup>31</sup> It is also not clear to what  
29  
30 327 extent the aeroallergens released by colleagues using powdered latex gloves influence this  
31  
32 328 finding. Furthermore the role of other latex containing medical devices during sensitisation  
33  
34 329 period cannot be entirely ruled out.  
35  
36  
37  
38  
39  
40  
41

42 330 In our study, frequency of exposure as measured by the number of gloves used in the last 7  
43  
44 331 working days showed a weak association between powdered latex gloves and latex sensitisation  
45  
46 332 but no association could be demonstrated with powder free latex gloves. Airborne latex  
47  
48 333 aeroallergens have been shown to increase with the number of powdered gloves used which  
49  
50 334 subsequently increases the risk of latex sensitisation and clinical latex glove related allergy  
51  
52 335 symptoms.<sup>18</sup>  
53  
54  
55  
56  
57  
58  
59  
60

1  
2  
3 336 The positive association between department with low glove consumption per HCW and latex  
4  
5  
6 337 sensitisation is in contrast with previous finding by Liss and co-workers.<sup>9</sup> They reported positive  
7  
8 338 association with departments that had high glove consumption per HCWs. Again, this could be  
9  
10 339 as a result of reverse causality where HCWs with latex sensitisation may have been relocated to  
11  
12 340 wards with low glove consumption to minimise the exposure. In addition, the annual pair of  
13  
14 341 gloves consumption per HCW by department does not provide an accurate indication of  
15  
16 342 individual exposure; rather it gives us the annual distribution of gloves to different departments.  
17  
18  
19  
20  
21 343 Several studies have reported atopy as a significant risk factor for latex sensitisation.<sup>9, 10, 35</sup>  
22  
23 344 Similarly, the prevalence of reporting a history of personal atopy in this study was higher among  
24  
25 345 latex sensitised participants although the association was not statistically significant. The role of  
26  
27 346 atopy is complex because some individuals might also have become atopic after having been  
28  
29 347 latex sensitised and cross sectional study is not suitable in establishing this association.  
30  
31  
32  
33  
34 348 Fruit latex allergy syndrome is a phenomenon seen where latex sensitised individuals  
35  
36 349 demonstrate a cross reactivity with specific foods; particularly fruit. Studies have identified this  
37  
38 350 phenomenon among sensitised HCWs and the general population. This has been attributed to the  
39  
40 351 similarity between fruit proteins and latex allergens.<sup>36</sup> Fruit allergy was significantly associated  
41  
42 352 with latex sensitisation and latex allergy in our study. Our study was dependent on the self-  
43  
44 353 reporting of fruit allergy and no objective tests were carried out. It is therefore possible that  
45  
46 354 participants have independent simultaneous allergies to both fruit and latex without cross  
47  
48 355 reactivity. Also, we were unable to determine whether latex sensitisation preceded the  
49  
50 356 development of fruit allergy or vice versa. Fruit allergy prior to latex exposure could have  
51  
52 357 contributed to the association observed in our study.  
53  
54  
55  
56  
57  
58  
59  
60

1  
2  
3 358 Latex sensitised participants reported a high prevalence of a history of previous open surgery in  
4  
5  
6 359 our study. This has been reported to occur as a result of direct intraoperative exposure to latex  
7  
8 360 containing medical devices such as catheters or tubes. Studies in children with congenital  
9  
10 361 abnormalities have demonstrated that the risk for latex allergy increases with the number of open  
11  
12 362 surgical procedures that they undergo.<sup>37</sup> Frequency of invasive procedures among adults was  
13  
14 363 shown to increase the risk of latex sensitisation reporting while more than 10 procedures  
15  
16 364 increased the risk of developing latex allergy.<sup>38</sup>

17  
18  
19  
20  
21 365 Strengths of this study include the high response rate (85.5%) and comparability to other  
22  
23 366 studies.<sup>8, 16</sup> Access to the hospital employee database allowed us to better assess the  
24  
25 367 representativeness of this study population by comparing demographic data of the non-  
26  
27 368 participants and the participants. The participants were randomly selected minimising the  
28  
29 369 potential of participant's bias that comes with a volunteer approach.

30  
31  
32  
33  
34 370 The presence of a control group provided a background prevalence of latex sensitisation in this  
35  
36 371 population which allowed for a better estimation of associations attributable to work related  
37  
38 372 factors. The use of Stallergenes latex specific SPT further strengthens the study. The SPT test is  
39  
40 373 regarded as the gold standard for the diagnosis of latex allergy and Stallergenes has been shown  
41  
42 374 to have a diagnostic sensitivity and specificity of 93% and 100%, respectively.<sup>32</sup> The research  
43  
44 375 assistant employed on this study was trained and initially shadowed and periodically supervised  
45  
46 376 by the principal investigator to ensure appropriate administration of the questionnaire and the  
47  
48 377 SPT thereby improving the reliability and validity of the study.

49  
50  
51  
52  
53  
54 378 This study was limited by the cross sectional study design which was relatively low in cost and  
55  
56 379 quick to conduct. It only allowed for the determination of prevalence of latex sensitisation at one  
57  
58  
59  
60



1  
2  
3 380 point in time. Consequently the prevalence of latex sensitisation may have been underestimated  
4  
5  
6 381 as it is possible that HCWs who had already developed latex sensitisation have left the hospital  
7  
8 382 before the study was conducted. Some of the observed associations in the study may be as a  
9  
10 383 result of a complex interplay between the healthy worker effect, reverse causality and exposure  
11  
12 384 reduction by the introduction of powder free latex gloves. These interactions can be better  
13  
14  
15 385 explored and understood in a longitudinal study. Recall bias is another potential limitation in this  
16  
17 386 study as workers were asked to recall the number of gloves used in the past 7 working days.  
18  
19  
20 387 HCWs may have overestimated or underestimated their individual exposures. Our study  
21  
22 388 depended on self-reporting of personal and family atopic disorders and this may have resulted in  
23  
24 389 the misclassification of atopy. The role of atopy and cross-reactivity between allergens is a  
25  
26  
27 390 complex phenomenon which cannot be investigated in cross sectional study. Therefore, cohort  
28  
29 391 studies are necessary to disentangle this phenomenon.  
30  
31

## 32 392 **CONCLUSION**

33  
34  
35 393 This study shows that even in the presence of powder free hypoallergenic glove use there is latex  
36  
37 394 sensitisation and latex allergy, adding to previous findings that HCWs exposed to hypoallergenic  
38  
39  
40 395 latex gloves are still at risk for developing latex sensitisation and latex allergy. This indicates that  
41  
42 396 latex sensitisation and allergy are still an important occupational hazard for HCWs. While it may  
43  
44  
45 397 be economically impractical to replace the latex gloves in our setting, reduction of allergen  
46  
47 398 content in latex products is another strategy that can be implemented to address the problem and  
48  
49 399 protect HCWs. A policy accompanied by clear implementation plans as well as sustainable  
50  
51  
52 400 education and training programmes to address latex sensitisation and allergy among HCWs  
53  
54 401 should be implemented.<sup>39</sup> In addition HCWs must be continuously monitored for the  
55  
56  
57 402 development of latex sensitisation and alternate latex free glove must be made available for  
58  
59  
60



1  
2  
3 403 them. More research is needed to identify the most cost effective way of implementing a latex  
4  
5 404 free environment in resource limited countries, such as South Africa. In addition the current  
6  
7  
8 405 studies in South Africa have largely been cross-sectional in nature. More cohort analysis is  
9  
10 406 required to better understand the chronicity of illness and disability associated with latex allergy.  
11  
12

### 13 14 407 **ACKNOWLEDGEMENT**

15  
16 408 I would like to thank the hospital employees participating in this study and their management for  
17  
18 409 allowing me access to the human resource database. I would like to thank Professor Mohamed  
19  
20 410 Jeebhay (Centre of Occupational and Environmental Health, University of Cape Town, SA) and  
21  
22 411 Professor David L Nordstrom (Occupational and Environmental Safety and Health, University of  
23  
24 412 Wisconsin-Whitewater, USA) for their comments on my initial proposal. I would like to thank  
25  
26 413 Professor Rajen Naidoo (Discipline of Occupational and Environmental Health, UKZN, SA) for  
27  
28 414 his statistical advice during the data analysis. In addition thank you to Mr. Nhlanhla Jwara for  
29  
30  
31  
32 415 conducting the field work.  
33  
34  
35  
36  
37  
38  
39  
40  
41  
42  
43  
44  
45  
46  
47  
48  
49  
50  
51  
52  
53  
54  
55  
56  
57  
58  
59  
60

1  
2  
3 416 **Contributorship**  
4  
5

6  
7 417 Dr Shumani Phaswana is the principal investigator who was involved from the conception of the idea,  
8  
9 418 proposal writing, data collection, data management and interpretation of the results.

10  
11 419 Dr Saloshni Naidoo contributed to the conception and design of the study, analysis and interpretation of  
12  
13 420 the data, critical review of the intellectual content of the article and final approval of the article.  
14

15  
16 421 **Data sharing**  
17

18  
19  
20 422 No additional unpublished data  
21

22  
23 423 **Funding**  
24

25  
26 424 None  
27

28  
29  
30 425 **Competing interests**  
31

32  
33 426 None declared  
34  
35  
36  
37 427  
38  
39

40 428 **Figure legend**  
41

42  
43 429 **Figure 1: Exposure-response relationship between duration of employment and latex sensitisation using**  
44 430 **penalised splines including a.) All particioants and b) Spt positive only**  
45

46 431  
47  
48  
49  
50  
51  
52  
53  
54  
55  
56  
57  
58  
59  
60

## 432 REFERENCES

- 433 1. Nutter AF. Contact urticaria to rubber. *The Bri J Dermatol*. 1979; 101: 597-8.
- 434 2. Centers for Disease Control. Recommendations for prevention of HIV transmission in health-  
435 care settings. *MMWR Morb and Mort Wkly Rep*. 1987; 36 Suppl 2: 1S-18S.
- 436 3. Rego A, Roley L. In-use barrier integrity of gloves: latex and nitrile superior to vinyl. *Am J Infect*  
437 *Control*. 1999; 27: 405-10.
- 438 4. Leung R, Ho A, Chan J, et.al. Prevalence of latex allergy in hospital staff in Hong Kong. *Clin Exp*  
439 *Allergy* 1997; 27: 167-74.
- 440 5. Chaiear N, Jindawong B, Boonsawas W, et.al. Glove allergy and sensitization to natural rubber  
441 latex among nursing staff at Srinagarind Hospital, Khon Kaen, Thailand. *J Med Assoc Thailand*. 2006; 89:  
442 368-76.
- 443 6. Wan KS, Lue HC. Latex allergy in health care workers in Taiwan: prevalence, clinical features. *Int*  
444 *Arch Occup Environ Health*. 2007; 80: 455-7.
- 445 7. Douglas R, Morton J, Czarny D, et.al. Prevalence of IgE-mediated allergy to latex in hospital  
446 nursing staff. *Aust N Z J Med*. 1997; 27: 165-9.
- 447 8. Grzybowski M, Ownby DR, Peyser PA, et.al. The prevalence of anti-latex IgE antibodies among  
448 registered nurses. *J Allergy Clin Immunol*. 1996; 98: 535-44.
- 449 9. Liss GM, Sussman GL, Deal K, et al. Latex allergy: epidemiological study of 1351 hospital workers.  
450 *Occup Environ Med*. 1997; 54: 335-42.
- 451 10. Watts DN, Jacobs RR, Forrester B, et.al. An evaluation of the prevalence of latex sensitivity  
452 among atopic and non-atopic intensive care workers. *Am J Ind Med*. 1998; 34: 359-63.
- 453 11. Verna N, Di Giampaolo L, Renzetti A, et al. Prevalence and risk factors for latex-related diseases  
454 among healthcare workers in an Italian general hospital. *Ann Clin Lab Sci*. 2003; 33: 184-91.
- 455 12. Porri F, Lemiere C, Birnbaum J, et al. Prevalence of latex sensitization in subjects attending  
456 health screening: implications for a perioperative screening. *Clin Exp Allergy* . 1997; 27: 413-7.
- 457 13. Bousquet J, Flahault A, Vandenplas O, et al. Natural rubber latex allergy among health care  
458 workers: a systematic review of the evidence. *J Allergy Clin Immunol*. 2006; 118: 447-54.
- 459 14. Brathwaite N, Motala C, Toerien A, et.al. Latex allergy--the Red Cross Children's Hospital  
460 experience. *S Afr med J*. 2001; 91: 750-1.
- 461 15. de Beers C, Cilliers J. Accurate diagnosis of latex allergy in hospital employees is cost-effective.  
462 *Curr Allergy Clin Immunol*. 2004; 91: 760-5.
- 463 16. Potter PC, Crombie I, Marian A, et.al. Latex allergy at Groote Schuur Hospital--prevalence,  
464 clinical features and outcome. *S Afr Med J*. 2001; 91: 760-5.
- 465 17. Department of Labour. Compensation of Occupational and Diseases Act no 130. South Africa:  
466 Pretoria, 1993.
- 467 18. Allmers H, Brehler R, Chen Z, et.al. Reduction of latex aeroallergens and latex-specific IgE  
468 antibodies in sensitized workers after removal of powdered natural rubber latex gloves in a hospital. *J*  
469 *Allergy Clin Immunol* . 1998; 102: 841-6.
- 470 19. Wrangsjö K, Boman A, Liden C, et.al. Primary prevention of latex allergy in healthcare-spectrum  
471 of strategies including the European glove standardization. *Contact dermatitis*. 2012; 66: 165-71.
- 472 20. Malerich PG, Wilson ML, Mowad CM. The effect of a transition to powder-free latex gloves on  
473 workers' compensation claims for latex-related illness. *Dermatitis*. 2008; 19: 316-8.
- 474 21. Baur X, Chen Z, Allmers H. Can a threshold limit value for natural rubber latex airborne allergens  
475 be defined? *J Allergy Clin Immunol*. 1998; 101: 24-7.
- 476 22. Hayes BB, Afshari A, Millecchia L, et.al. Evaluation of percutaneous penetration of natural  
477 rubber latex proteins. *Toxicol Sci* 2000; 56: 262-70.

- 1  
2  
3 478 23. Mabe DO, Singh TS, Bello B, et.al. Allergenicity of latex rubber products used in South African  
4 479 dental schools. *S Afri Med J* 2009; 99: 672-4.  
5 480 24. LaMontagne AD, Radi S, Elder DS, et.al. Primary prevention of latex related sensitisation and  
6 481 occupational asthma: a systematic review. *Occup Environ Med* 2006; 63: 359-64.  
7 482 25. Heederik D, Henneberger PK, Redlich CA. et.al.. Primary prevention: exposure reduction, skin  
8 483 exposure and respiratory protection. *Eur Respir Rev* 2012; 21: 112-24.  
9 484 26. Baur X, Sigsgaard T. The new guidelines for management of work-related asthma. *The Eur Respir*  
10 485 *J* 2012; 39: 518-9.  
11 486 27. Potter PC. Latex allergy--time to adopt a powder-free policy nationwide. *S Afri Med J* 2001; 91:  
12 487 746-8.  
13 488 28. Liss GM, Tarlo SM. Natural rubber latex-related occupational asthma: association with  
14 489 interventions and glove changes over time. *Am J Ind Med* 2001; 40: 347-53.  
15 490 29. Hunt LW, Kelkar P, Reed CE, et.al. Management of occupational allergy to natural rubber latex in  
16 491 a medical center: the importance of quantitative latex allergen measurement and objective follow-up. *J*  
17 492 *Allergy Clin Immunol* 2002; 110: S96-106.  
18 493 30. Schmid K, Christoph Broding H, Niklas D, et.al. Latex sensitization in dental students using  
19 494 powder-free gloves low in latex protein: a cross-sectional study. *Contact dermatitis* 2002; 47: 103-8.  
20 495 31. Clayton TH, Wilkinson SM. Contact dermatoses in healthcare workers: reduction in type I latex  
21 496 allergy in a UK centre. *Clin Exp Dermatol* 2005; 30: 221-5.  
22 497 32. Turjanmaa K, Palosuo T, Alenius H, et al. Latex allergy diagnosis: in vivo and in vitro  
23 498 standardization of a natural rubber latex extract. *Allergy* 1997; 52: 41-50.  
24 499 33. Morris A. ALLSA Position Statement: Allergen Skin-Prick Testing. *Curr Allergy Clin Immunol* 2006;  
25 500 90: 22-5.  
26 501 34. Smith AM, Amin HS, Biagini RE, et al. Percutaneous reactivity to natural rubber latex proteins  
27 502 persists in health-care workers following avoidance of natural rubber latex. *Clin Exp Allergy* 2007; 37:  
28 503 1349-56.  
29 504 35. Suli C, Parziale M, Lorini M, et.al. Prevalence and risk factors for latex allergy: a cross sectional  
30 505 study on health-care workers of an Italian hospital. *J Investig Allergol Clin Immunol* 2004; 14: 64-9.  
31 506 36. Blanco C. Latex-fruit syndrome. *Cur Allergy Asthma Rep* 2003; 3: 47-53.  
32 507 37. Porri F, Pradal M, Lemiere C, et al. Association between latex sensitization and repeated latex  
33 508 exposure in children. *Anesthesiology* 1997; 86: 599-602.  
34 509 38. Rueff F, Kienitz A, Schopf P, et al. Frequency of natural rubber latex allergy in adults is increased  
35 510 after multiple operative procedures. *Allergy* 2001; 56: 889-94.  
36 511 39. Brown RH, Hamilton RG, McAllister MA. How health care organizations can establish and  
37 512 conduct a program for a latex-safe environment. *Jt Comm J Qual Saf* 2003; 29: 113-23.

513

514

515 **TABLES**516 **Table 1: Demographics and associated risk factors amongst latex exposed and unexposed**  
517 **healthcare workers at King Edward VIII Hospital, KwaZulu-Natal South Africa, (n=501)**518  
519

| Characteristic                              | Exposed<br>N (%) | Unexposed<br>N (%) |
|---------------------------------------------|------------------|--------------------|
| Number of participants                      | 337 (67.3)       | 164 (32.7)         |
| <b>Demographics</b>                         |                  |                    |
| Age (years)                                 |                  |                    |
| ≤30                                         | 30(8.9)          | 19(11.6)           |
| >30-40                                      | 121(35.9)        | 40(24.4)           |
| >40-50                                      | 101(29.9)        | 59(35.9)           |
| >50                                         | 85(25.2)         | 46(28.1)           |
| Duration of employment (years)              |                  |                    |
| ≤5                                          | 39(11.6)         | 28(17.1)           |
| >5-10**                                     | 135(40.1)        | 32(19.5)           |
| >10-15                                      | 49(14.5)         | 17(10.4)           |
| >15-20                                      | 24(7.1)          | 20(12.2)           |
| >20*                                        | 90(26.7)         | 67(40.9)           |
| Sex **                                      |                  |                    |
| Female                                      | 309(91.7)        | 95(57.9)           |
| Male                                        | 28(8.3)          | 69(42.1)           |
| Job Title (yes)                             |                  |                    |
| Administrative                              |                  | 164(100.0)         |
| Professional nurses                         | 123(36.5)        |                    |
| Enrolled nurses                             | 141(41.8)        |                    |
| Enrolled nursing assistants                 | 73 (21.7)        |                    |
| <b>Medical and Personal History</b>         |                  |                    |
| Personal history of Allergy Disease (yes)   | 147(43.6)        | 83(50.6)           |
| Family history of Allergy Disease (yes)     | 197(58.5)        | 102(62.2)          |
| Fruit allergy (yes)                         | 29(8.6)          | 9(5.5)             |
| Previous open surgery (yes)*                | 168(49.8)        | 61(37.2)           |
| Work-related allergy symptoms(yes)*         | 138(40.9)        | 52(31.7)           |
| Non-occupational latex exposure (yes)       | 161(47.8)        | 76(46.3)           |
| Latex sensitisation (yes)                   | 24(7.1)          | 5(3.1)             |
| Current latex allergy (yes)*                | 20(5.9)          | 3(1.8)             |
| <b>Chi square, *p&lt;0.05, **p&lt;0.001</b> |                  |                    |

520

521

522

523

524

524

**Table 2: Comparison of risk factors between latex sensitised (skin prick test positive) and non-sensitised (skin prick test negative) healthcare workers at King Edward VIII Hospital, KwaZulu-Natal South Africa (n=501)**

| Characteristics                                | Latex SPT +ve† (29)<br>N (%) | Latex SPT -ve†‡ (472)<br>N (%) | 529<br>530<br>531 |
|------------------------------------------------|------------------------------|--------------------------------|-------------------|
| <b>Demographics</b>                            |                              |                                | 532               |
| Age (years.)                                   |                              |                                | 533               |
| ≤30                                            | 1 (3.5)                      | 48(10.2)                       | 534               |
| >30-40                                         | 13 (44.8)                    | 148(31.4)                      | 535               |
| >40-50                                         | 8 (27.6)                     | 152(32.2)                      | 536               |
| >50                                            | 7 (24.1)                     | 124(26.3)                      | 537               |
| Duration of employment                         |                              |                                | 538               |
| ≤5                                             | 3(10.3)                      | 64(13.6)                       | 539               |
| >5-10                                          | 16(55.2)                     | 151(31.9)                      | 540               |
| >10-15                                         | 3(10.3)                      | 63(13.4)                       | 541               |
| >15-20                                         | 1(3.5)                       | 43(9.1)                        | 542               |
| >20                                            | 6(20.7)                      | 151(31.9)                      | 543               |
| Sex (yes)                                      |                              |                                | 544               |
| Male                                           | 5(17.2)                      | 118(25.0)                      | 545               |
| Female                                         | 24(82.8)                     | 354(75.0)                      | 546               |
| Job Title (yes)                                |                              |                                | 547               |
| Administrative                                 | 5(17.2)                      | 159(33.7)                      | 548               |
| Professional nurses                            | 5(17.2)                      | 118(25.0)                      | 549               |
| Enrolled nurses                                | 14(48.3)                     | 127(26.9)                      | 550               |
| Enrolled nursing assistants                    | 5(17.2)                      | 68(14.4)                       | 551               |
| <b>Latex Exposure</b>                          |                              |                                | 552               |
| Exposure status(yes)                           | 24 (82.8)                    | 313(66.3)                      | 553               |
| Type of gloves                                 |                              |                                | 554               |
| None                                           | 5(17.2)                      | 165(34.6)                      | 555               |
| Exclusive powdered latex glove (yes)           | 2(6.9)                       | 36(7.6)                        | 556               |
| Exclusive powder free latex glove (yes)*       | 11(37.9)                     | 77(16.3)                       | 557               |
| Mixed (yes)                                    | 11(37.9)                     | 198(41.9)                      | 558               |
| <b>Medical and Personal History</b>            |                              |                                | 559               |
| Personal history of Allergy Disease (yes)      | 16(55.2)                     | 214(45.3)                      | 560               |
| Family history of Allergy Disease (yes)        | 18(62.1)                     | 281(59.5)                      | 561               |
| Fruit allergy (yes) *                          | 5(17.2)                      | 33(6.9)                        | 562               |
| Previous open surgery (yes)                    | 18(62.1)                     | 211(44.7)                      | 563               |
| Non-occupational latex exposure (yes)          | 12(41.4)                     | 225(47.7)                      | 564               |
| Reaction to other latex medical devices (yes)* | 3(10.3)                      | 8(1.7)                         | 565               |
| <b>Chi Square, *p&lt;0.05</b>                  |                              |                                | 566               |
| <b>†Latex Skin Prick Test Positive</b>         |                              |                                | 567               |
| <b>‡Latex Skin Prick Test Negative</b>         |                              |                                | 568               |
|                                                |                              |                                | 569               |

570  
571  
572  
573

574 **Table 3: Crude Odds Ratios (OR) (95%CI) of demographics, exposure status, medical and personal**  
 575 **history and latex sensitisation and latex allergy amongst healthcare workers at King Edward VIII**  
 576 **Hospital, KwaZulu-Natal South Africa, (n=501)**

| Characteristics                                                                      | N=2<br>9 | Latex Sensitisation<br>OR (95%CI) | N=23 | LA#<br>OR (95%CI) | 578<br>579 |
|--------------------------------------------------------------------------------------|----------|-----------------------------------|------|-------------------|------------|
| <b>Demographics</b>                                                                  |          |                                   |      |                   |            |
| Age (years)                                                                          |          |                                   |      |                   | 580        |
| ≤30                                                                                  | 1        | 0.3(0.0-1.9)                      | 1    | 0.4(0.0-2.4)      | 581        |
| >30-40                                                                               | 13       | 1.8(0.8-3.7)                      | 11   | 2.0(0.9-4.6)      | 582        |
| >40-50                                                                               | 8        | 0.8(0.4-1.8)                      | 7    | 0.9(0.4-2.2)      | 583        |
| >50                                                                                  | 7        | 0.8(0.4-2.1)                      | 4    | 0.6(0.2-1.7)      | 584        |
| Duration of employment (years)                                                       |          |                                   |      |                   | 585        |
| <5                                                                                   | 3        | 0.7(0.2-2.4)                      | 3    | 0.9(0.3-3.2)      | 586        |
| 5-10                                                                                 | 16       | 2.6(1.2-5.5)*                     | 14   | 3.3(1.4-7.6)*     | 587        |
| >10-15                                                                               | 3        | 0.7(0.2-2.4)                      | 3    | 0.9(0.3-3.2)      | 588        |
| >15-20                                                                               | 1        | 0.4(0.0-2.1)                      | 1    | 0.5(0.0-2.8)      | 589        |
| >20                                                                                  | 6        | 0.5(0.2-1.4)                      | 2    | 0.2(0.0-0.8)      | 590        |
| Sex (yes)                                                                            |          |                                   |      |                   | 591        |
| Female                                                                               | 24       | 1.6(0.6-4.1)                      | 20   | 2.2(0.7-7.2)      | 592        |
| Job Title (yes)                                                                      |          |                                   |      |                   | 593        |
| Administrative                                                                       | 5        | 0.4(0.2-1.1)                      | 3    | 0.3(0.1-0.9)*     | 594        |
| Professional nurses                                                                  | 5        | 0.6(0.2-1.6)                      | 4    | 0.6(0.2-1.8)      | 595        |
| Enrolled nurses                                                                      | 14       | 2.5(1.2-5.3)*                     | 11   | 2.4(1.1-5.6)*     | 596        |
| Enrolled nursing assistants                                                          | 5        | 1.2(0.5-3.3)                      | 5    | 1.7(0.6-4.5)      | 597        |
| <b>Latex Exposure</b>                                                                |          |                                   |      |                   |            |
| Exposure status (yes)                                                                | 24       | 2.4(0.9-6.3)                      | 20   | 3.4(1.1-10.8)     | 598        |
| Type of gloves                                                                       |          |                                   |      |                   | 599        |
| None                                                                                 | 5        | 0.4(0.2-1.0)                      | 3    | 0.3(0.1-0.9)*     | 600        |
| Exclusive Powdered latex glove (yes)                                                 | 2        | 0.9(0.0-3.6)                      | 2    | 1.2(0.0-1.7)      | 601        |
| Exclusive Powder free latex glove (yes)                                              | 11       | 3.1(1.4-6.8)*                     | 10   | 3.1(1.7-9.1)*     | 602        |
| Mixed gloves(yes)                                                                    | 11       | 0.8(0.4-1.8)                      | 8    | 0.7(0.3-1.7)      |            |
| <b>Medical and Personal History</b>                                                  |          |                                   |      |                   |            |
| Personal history of Allergy Disease (yes)                                            | 16       | 1.4(0.7-3.1)                      | 12   | 1.3(0.5-2.9)      | 600        |
| Family history of Allergy Disease (yes)                                              | 18       | 1.1(0.5-2.4)                      | 14   | 1.1(0.5-2.4)      | 601        |
| Fruit allergy (yes)                                                                  | 5        | 2.8(1.0-7.5)                      | 5    | 3.7(1.4-10.5)*    | 602        |
| Previous open surgery (yes)                                                          | 18       | 1.1(0.5-2.4)                      | 14   | 1.5(0.7-3.1)      |            |
| <b>Chi square, *p&lt;0.05</b>                                                        |          |                                   |      |                   | 597        |
| <b>†Latex Skin Prick Test Positive</b>                                               |          |                                   |      |                   | 598        |
| <b>‡Latex Skin Prick Test Positive and work related clinical symptoms of allergy</b> |          |                                   |      |                   | 599        |

600

601

602

**Table 4: Multivariate analysis of demographics, medical and personal history, exposure history and latex sensitisation (LS)<sup>†</sup> and latex allergy (LA)<sup>#</sup> amongst healthcare workers at King Edward III Hospital, KwaZulu-Natal South Africa, (n=501)**

| Characteristics                              | MODEL I* (n=501) |               | MODEL II** (n=501) |               | MODEL III***(n=202) |               | MODEL IV****(n=252) |               |
|----------------------------------------------|------------------|---------------|--------------------|---------------|---------------------|---------------|---------------------|---------------|
|                                              | LS OR (95%CI)    | LA OR (95%CI) | LS OR (95%CI)      | LA OR (95%CI) | LS OR (95%CI)       | LA OR (95%CI) | LS OR (95%CI)       | LA OR (95%CI) |
| <b>Demographics</b>                          |                  |               |                    |               |                     |               |                     |               |
| Sex (female)                                 | 0.9(0.2-2.7)     | 1.1(0.3-4.4)  | 0.9(0.3-2.7)       | 1.1(0.3-4.5)  | 0.3(0.0-1.8)        | 0.3(0.0-3.1)  | 2.5(0.5-12.2)       | 2.5(0.5-12.2) |
| Duration of employment (years)               | 0.9(0.9-1.0)     | 0.9(0.8-0.9)  | 0.9(0.9-1.0)       | 0.9(0.8-0.9)  | 0.9(0.9-1.8)        | 0.7(0.5-1.0)  | 0.9(0.9-1.0)        | 0.9(0.9-1.0)  |
| <b>Latex Exposure</b>                        |                  |               |                    |               |                     |               |                     |               |
| Exposure status(yes)                         | 2.2(0.7-6.7)     | 2.6(0.7-9.8)  |                    |               |                     |               |                     |               |
| Type of gloves                               |                  |               |                    |               |                     |               |                     |               |
| None                                         |                  |               | 1                  | 1             |                     |               |                     |               |
| Exclusive lightly powdered latex glove (yes) |                  |               | 1.6(0.3-9.8)       | 2.6(0.4-17.7) |                     |               |                     |               |
| Exclusive Powder free latex glove (yes)      |                  |               | 4.2(1.2-14.1)      | 5.1(1.2-21.2) |                     |               |                     |               |
| Mixed gloves (yes)                           |                  |               | 1.7(0.5-5.6)       | 1.7(0.4-7.1)  |                     |               |                     |               |



|                                                      |               |              |              |              |               |                |              |               |
|------------------------------------------------------|---------------|--------------|--------------|--------------|---------------|----------------|--------------|---------------|
| Pairs of Powdered latex Gloves in the last 7 days    |               |              |              |              | 1.1(1.0-1.2)  | 1.2(1.0-1.4)   |              |               |
| Pairs of Powder Free Latex Gloves in the last 7 days |               |              |              |              |               |                | 1.0(0.9-1.1) | 1.0(0.9-1.1)  |
| <b>Personal and Medical History</b>                  |               |              |              |              |               |                |              |               |
| Personal history of allergy disease (yes)            | 1.5(0.7-3.3)  | 1.4(0.6-3.2) | 1.5(0.7-3.3) | 1.3(0.6-3.2) | 1.4(0.3-6.8)  | 1.6(0.2-11.6)  | 1.0(0.4-2.9) | 0.9(0.3-2.8)  |
| Family history of allergy disease (yes)              | 1.0(0.45-2.2) | 0.9(0.4-2.2) | 1.1(0.5-2.3) | 0.9(0.4-2.3) | 0.4(0.1-1.9)  | 0.5(0.1-3.6)   | 0.7(0.2-2.0) | 0.8(0.3-2.7)  |
| Fruit allergy (yes)                                  | 2.3(0.8-6.7)  | 3.1(1.1-9.2) | 2.2(0.8-6.5) | 3.0(0.9-9.1) | 5.0(0.4-56.9) | 9.7(0.6-163.0) | 1.7(0.3-8.5) | 2.0(0.4-10.4) |
| Previous open surgery (yes)                          | 2.0(0.9-4.4)  | 1.9(0.8-4.6) | 2.1(0.9-4.6) | 1.9(0.8-4.7) | 1.4(0.3-7.4)  | 1.2(0.1-11.1)  | 1.1(0.4-3.2) | 1.2(0.4-3.8)  |

†Latex Skin Prick Test Positive

‡Latex Skin Prick Test Positive and work related clinical symptoms of allergy

\*Model included latex glove exposure status

\*\*Model included type of gloves

\*\*\*Model included number of pairs of powdered latex gloves

\*\*\*\*Model included number of pairs of powder free latex gloves

1  
2  
3  
4  
5  
6  
7  
8  
9  
10  
11  
12  
13  
14  
15  
16  
17  
18  
19  
20  
21  
22  
23  
24  
25  
26  
27  
28  
29  
30  
31  
32  
33  
34  
35  
36  
37  
38  
39  
40  
41  
42  
43  
44  
45  
46  
47  
48  
49  
50  
51  
52  
53  
54  
55  
56  
57  
58  
59  
60

1 **The prevalence of latex sensitisation and allergy and associated risk factors among healthcare**  
2 **workers using hypoallergenic latex gloves at King Edward VIII Hospital, KwaZulu-Natal South**  
3 **Africa: A cross sectional study**

4  
5 S M Phaswana<sup>1</sup>, S Naidoo<sup>1</sup>

6 <sup>1</sup>Discipline of Occupational and Environmental Health, School of Nursing and Public Health,  
7 University of kwaZulu Natal, South Africa

8  
9 Contact Details for Corresponding Author

10 Dr Shumani Makwarela Phaswana

11 306 Valhaven

12 80 Cromwell Road

13 Glenwood

14 Durban

15 4001

16 E-mail: [shuma8008@yahoo.com](mailto:shuma8008@yahoo.com)

17 Tel nr: 031 260 4507

18 Fax nr: 031 260 4663

19  
20 Keywords: Latex, hypoallergenic, healthcare workers, South Africa

21 Word Count:

22 Abstract: 299

23 Body: 4,359

24

25

26

27

**ARTICLE SUMMARY****ARTICLE FOCUS**

- The use of hypoallergenic latex gloves has been adopted as policy in different healthcare settings globally.
- However, information with regard to their use and the development of latex sensitisation and allergy among exposed healthcare workers is limited.
- We hypothesised that there is latex sensitization and allergy in healthcare workers using hypoallergenic latex gloves in a South African hospital.

**KEY MESSAGE**

- In the presence of powder free hypoallergenic gloves, latex sensitisation and latex allergy is still an important occupational health effect in healthcare workers.
- Healthcare workers should be continuously monitored for the development of latex sensitisation and allergy.
- There is a need for a national policy accompanied by clear implementation plans as well as sustainable education and training programmes to address latex sensitisation and allergy among HCWs.

**STRENGTH AND LIMITATIONS**

- Strength of the study included the presence of a control group providing a background prevalence of latex sensitisation in this population and random selection of participants which minimised the potential of participant bias that arises with a volunteer approach.
- This study was limited by the cross sectional study design as it only allowed for the determination of the prevalence of latex sensitisation; recall bias with regard to the number of gloves used in the past 7 working days and the self-reporting of personal and family atopic disorders may have resulted in the misclassification of exposure and atopy respectively.

28

29

30

2

1  
2  
3  
4  
5  
6  
7  
8  
9  
10  
11  
12  
13  
14  
15  
16  
17  
18  
19  
20  
21  
22  
23  
24  
25  
26  
27  
28  
29  
30  
31  
32  
33  
34  
35  
36  
37  
38  
39  
40  
41  
42  
43  
44  
45  
46  
47  
48  
49  
50  
51  
52  
53  
54  
55  
56  
57  
58  
59  
60

31 **What this paper adds**

- 32  In the presence of powder free hypoallergenic gloves, latex sensitisation and latex allergy is still an
- 33 important occupational health hazard in healthcare workers
  
- 34  Healthcare workers should be continuously monitored for the development of latex sensitisation and
- 35 allergy
  
- 36  There is a need for a national policy accompanied by clear implementation plans as well as sustainable
- 37 education and training programmes to address latex sensitisation and allergy among HCWs

38

For peer review only

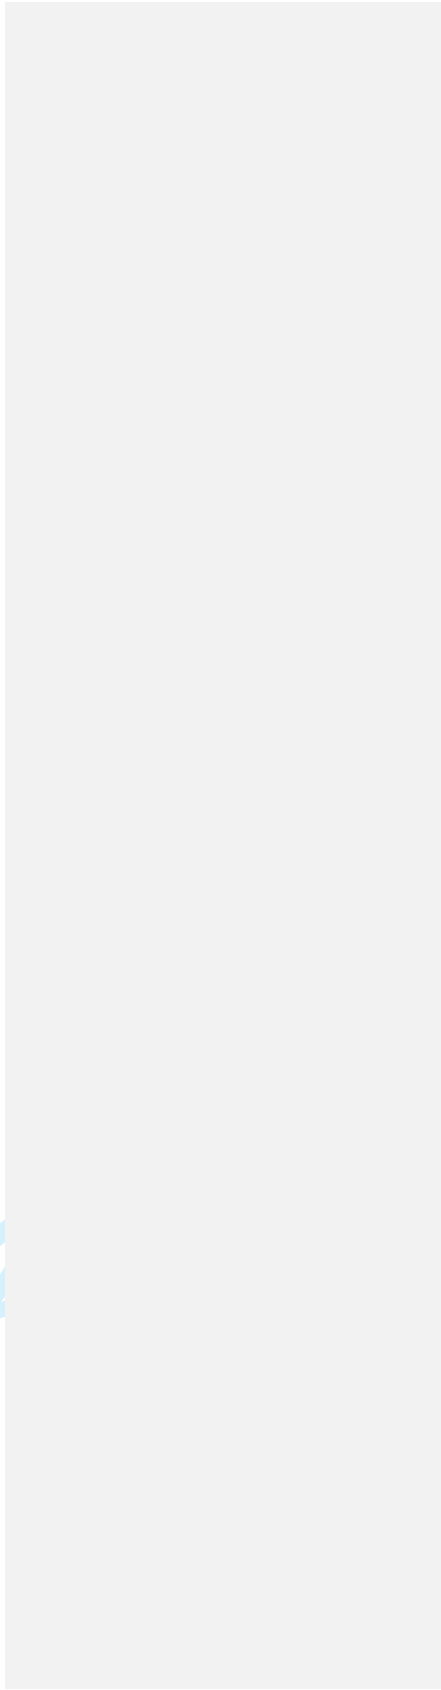

1  
2  
3  
4  
5  
6  
7  
8  
9 3910  
11 **ABSTRACT**12  
13  
14 **Objectives**

15  
16 42 The present study describes latex sensitisation and allergy prevalence and associated factors among  
17 43 healthcare workers using hypoallergenic latex gloves at King Edward VIII Hospital in KwaZulu-Natal  
18 44 South Africa.

19  
20  
21  
22 **Design**

23  
24 46 Cross sectional study

25  
26  
27 **Setting**

28  
29 48 A tertiary hospital in eThekweni municipality, KwaZulu Natal, South Africa

30  
31  
32 **Participants**

33  
34 50 600 healthcare workers were randomly selected and 501(337 exposed and 164 unexposed) participated.  
35 51 Participants who were pregnant, less than one year of work as healthcare worker and history of  
36 52 anaphylactic reaction were excluded from the study.

37  
38  
39  
40 **Primary and secondary outcome measures**

41  
42 54 Latex sensitisation and latex allergy were the outcome of interest and they were successfully measured

43  
44  
45 **Results**

46  
47 56 Prevalence of latex sensitisation and allergy was observed among exposed workers (7.1% and 5.9%) and  
48 57 unexposed workers (3.1% and 1.8%). Work related allergy symptoms were significantly higher in  
49 58 exposed workers (40.9%,  $p < 0.05$ ). Duration of employment was inversely associated with latex allergy  
50 59 (OR: 0.9; 95% CI: 0.8-0.9). The risk of latex sensitisation (OR: 4.2; 95% CI: 1.2-14.1) and allergy (OR:

51  
52  
53  
54 4  
55  
56  
57  
58  
59  
60

1  
2  
3  
4  
5  
6  
7  
8  
9 60 5.1; 95% CI: 1.2-21.2) increased with exclusive use of powder-free latex gloves. A dose –response  
10 61 relationship was observed for powdered latex gloves (OR: 1.1; 95% CI: 1.0-1.2). Atopy (OR: 1.5; 95%  
11 62 CI: 0.7-3.3 and OR: 1.4; 95% CI: 0.6-3.2) and fruit allergy (OR: 2.3; 95% CI: 0.8-6.7 and OR: 3.1; 95%  
12 63 CI: 1.1-9.2) also increased the risk of latex sensitisation and allergy.  
13  
14  
15

#### 16 64 **Conclusion**

17  
18 65 This study adds to previous findings that healthcare workers exposed to hypoallergenic latex gloves are at  
19 66 risk for developing latex sensitisation highlighting its importance as an occupational hazard in healthcare.  
20 67 More research is needed to identify the most cost effective way of implementing a latex free environment  
21 68 in resource limited countries, such as South Africa. In addition more cohort analysis is required to better  
22 69 understand the chronicity of illness and disability associated with latex allergy.  
23  
24  
25  
26  
27  
28  
29  
30  
31  
32  
33  
34  
35  
36  
37  
38  
39  
40  
41  
42  
43  
44  
45  
46  
47  
48  
49  
50  
51  
52  
53  
54  
55  
56  
57  
58  
59  
60

1  
2  
3  
4  
5  
6  
7  
8  
9 71 **INTRODUCTION**

10 72 Latex allergy (LA) as an occupational disease among healthcare workers (HCWs) gained  
11 73 recognition after Nutter published a case report of contact urticaria in a HCW in 1979.<sup>1</sup> The  
12 74 increase in prevalence coincided with the emergence of the Human Immunodeficiency Virus/  
13 75 Acquired immunodeficiency syndrome (HIV/AIDS) epidemic and the introduction of “universal  
14 76 precautions” in the healthcare industry which had resulted in the increased use of latex gloves  
15 77 among HCWs.<sup>2</sup>

16 78 Latex gloves are preferred due to their superior barrier and physical properties as compared to  
17 79 the non-latex gloves.<sup>3</sup> International epidemiological studies have reported the prevalence of latex  
18 80 allergy among HCWs to range between 2-22% depending on the population and diagnostic  
19 81 methods used.<sup>4-11</sup> The prevalence in the general population has been reported to range between  
20 82 1-6%.<sup>12,13</sup> In South Africa studies amongst HCWs reported a latex sensitisation prevalence of  
21 83 between 2.7 to 20.8%.<sup>14-16</sup> Latex allergy in HCWs is a compensable disease in South Africa in  
22 84 terms of the Compensation of Occupational Injuries and Diseases Act No. 130 of 1993.<sup>17</sup>

23 85 Powdered latex gloves were identified as an important risk factor for latex sensitisation and  
24 86 allergy in HCWs as they were found to contain high allergenic protein content.<sup>18</sup> Following these  
25 87 findings, hypoallergenic gloves with low allergen content namely, low powdered and powder  
26 88 free latex gloves were introduced. The European definition of powder free gloves is gloves with  
27 89 powder content not exceeding 2 mg per glove and leachable latex protein which is as low as is  
28 90 reasonably practical.<sup>19</sup>

29 91 Hypoallergenic gloves have been associated with reduced latex aeroallergen concentrations,  
30 92 reduced conversion rates and a subsequent decrease in clinic visits, and compensation claims for

1  
2  
3  
4  
5  
6  
7  
8  
9 93 latex induced occupational asthma and allergic contact dermatitis among HCWs.<sup>18,20</sup> As much as  
10 94 the use of low or powder free gloves has been shown to reduce latex related symptoms, other  
11 95 studies have shown that exposed HCWs still exhibit symptoms at very low levels of measureable  
12 96 airborne latex allergens.<sup>21</sup> Most studies have reported on the airborne levels and inhalational  
13 97 route of exposure hence the recommendation on low powdered or powder free latex gloves.  
14 98 There is little consideration given to the dermal route of exposure despite the fact that exposure  
15 99 is as a result of direct contact in these instances.<sup>22</sup> Eliminating the cornstarch powder only  
16 100 removed the carrier and not the source of allergen which is in the latex itself. Therefore workers  
17 101 using powder free gloves are still exposed to the allergenic content of latex gloves. It has been  
18 102 shown that different brands from different suppliers contain differing levels of protein due to a  
19 103 lack of standards in latex glove manufacture.<sup>23</sup> A South African study reported that some powder  
20 104 free latex gloves were found to have high allergenic protein content.<sup>23</sup> HCWs using these gloves  
21 105 are exposed via direct dermal contact and are at risk for developing latex sensitization which  
22 106 maybe asymptomatic and if exposure continues they can later develop latex allergy which  
23 107 presents with clinical manifestations.

24 108 While it is important to diagnose and manage an individual worker with latex allergy in the early  
25 109 stages of the disease, complete control of hazardous substance in the workplace is equally if not  
26 110 more important. While a latex free work environment would be a preferred control strategy,  
27 111 substitution of powdered latex gloves with powder free gloves was shown to be cost effective  
28 112 and associated with improved clinical outcome.<sup>20,24-26</sup> As a result this was adopted as the most  
29 113 reasonable and practical approach in addressing the problem of latex allergy among HCWs both  
30 114 internationally and to some extent nationally.<sup>27-29</sup> This has proven to reduce latex induced  
31 115 clinical outcomes. Even with this intervention, studies in Western countries such as Germany



1  
2  
3  
4  
5  
6  
7  
8  
9 116 and the UK have shown that the risk of latex sensitisation still exists and more needs to be done  
10  
11 117 to protect HCWs.<sup>30, 31</sup>

12  
13 118 The current study described the prevalence of latex sensitisation and allergy among healthcare  
14  
15 119 workers who use hypoallergenic powder free and lightly powdered latex gloves.

## 18 120 **METHODS**

### 21 121 **Study design and population**

22  
23  
24 122 This was a cross sectional study conducted between July 2011 and January 2012. The study  
25  
26 123 location was King Edward VIII hospital, the second largest hospital in the Southern hemisphere,  
27  
28 124 providing regional and tertiary services to the whole of KwaZulu-Natal (KZN) and the Eastern  
29  
30 125 Cape Province in South Africa. It has a bed status of 1300 and has a workforce of 2400. The  
31  
32 126 hospital was chosen due to the large workforce with different departments, and the policy of  
33  
34 127 using both powder free and low powdered latex gloves for approximately 10 years.

35  
36 128 The study population was limited to HCWs currently employed at King Edward VIII Hospital  
37  
38 129 for more than 12 months. HCWs were defined as all personnel employed in the hospital.

39  
40 130 The prevalence of latex sensitization in HCWs using powdered latex gloves in the Western Cape  
41  
42 131 Province was 11.9% in 2001.<sup>16</sup> We expected the prevalence at King Edward VIII hospital to be  
43  
44 132 less than the 11.9% observed in the Western Cape Province due to the adoption of a  
45  
46 133 hypoallergenic latex glove policy in 2001. Using EPI Info calculator version 3.04.04., it was  
47  
48 134 assumed that 50% of sensitised workers have remained sensitised despite the introduction of  
49  
50 135 hypoallergenic latex gloves 10 years prior. Using an expected latex sensitization prevalence of  
51  
52 136 6% for the exposed group and the prevalence among the general population being reported as

1  
2  
3  
4  
5  
6  
7  
8  
9 137 less than 1% the required sample size was calculated to be 585 participants 2 exposed  
10 138 participants for every 1 non-exposed participant (exposed =390; unexposed =195). HCWs were  
11 139 considered to be exposed if they were likely to use gloves. Unexposed HCWs were drawn from  
12  
13 140 the administrative staff of the hospital.  
14  
15

### 17 141 **Questionnaire**

18  
19  
20 142 We used an adaptation of the questionnaire used in an epidemiological study conducted at  
21 143 Groote Schuur in 2001<sup>16</sup> with permission from Professor Paul Potter, Allergology Unit, Medical  
22 144 School, University of Cape Town. The questionnaire containing open and closed ended questions  
23  
24 145 was adapted to include items on exposure assessment. The questionnaire was administered by a  
25 146 trained research assistant immediately prior to the skin prick test. The questionnaire collected  
26 147 data on the participants' demographics, personal risk factors, latex exposure assessment, clinical  
27 148 manifestations of latex sensitization (dermal and respiratory) and history of previous reactions  
28 149 suggestive of latex allergy.  
29  
30  
31  
32  
33  
34  
35

### 36 150 **Exposure Assessment**

#### 38 151 *Individual Exposure*

39  
40  
41 152 Individual latex exposure was determined by the type of gloves used, number of gloves used per  
42 153 day, and duration of glove use. The information was limited to 7 working shifts/days prior to the  
43 154 interview.  
44  
45  
46  
47

#### 48 155 *Departmental Exposure*

1  
2  
3  
4  
5  
6  
7  
8  
9 156 Departmental exposure was defined as glove usage in the past 12 months (01 January 2011-31  
10 157 December 2011). The overall departmental exposure was obtained by reviewing monthly glove  
11 158 usage by each department from the stock room register. This was used to estimate the annual  
12 159 exposure for employees who had rotated through different departments in the past 12 months.  
13 160 Non sterile latex gloves are distributed throughout the clinical departments while a high  
14 161 proportion of sterile gloves are distributed to labour ward, theatre, surgical wards and outpatient  
15 162 departments. Glove type was defined as powdered and powder-free and latex free based on the  
16 163 previous literature.<sup>23, 32</sup>

#### 164 **Skin prick test (SPT)**

165 The SPT was conducted using the Stallergenes kit.<sup>32</sup> It was performed in a room with access to  
166 emergency resuscitation services by a trained research assistant. The research assistant and  
167 principal investigator were trained on 2 separate occasions. The test was performed on the inner  
168 aspect of the participants' forearms, between the wrist and the elbow on normal skin. A positive  
169 and negative control were performed using histamine (0.61% concentration of phenol) and  
170 buffered normal saline solution respectively on the same arm and they were 3 cm apart to  
171 prevent cross contamination. The protein concentration of the latex extract was 500µg/ml and the  
172 solution was applied as it was with no further dilutions. After 15-20 minutes subsequent to  
173 puncturing the skin, the SPT reaction wheal and flare was outlined by a black ink and clear tape  
174 was used to transfer the outline from skin to the results sheet by the trained research assistant or  
175 principal investigator.<sup>33</sup> A positive result was indicated by a mean wheal diameter measuring 3  
176 mm or greater than the negative control. Results were recorded on a standardized result sheet.  
177 The research assistant's test performance was audited by the principal investigator at regular  
178 intervals to ensure correctness of technique and interpretation of the results.

1  
2  
3  
4  
5  
6  
7  
8  
9 179 Informed signed consent was obtained from all the participants prior to participation. They had  
10 180 the option of participating in the questionnaire interview and the SPT or refusing the SPT. The  
11 181 study protocol was approved by the Biomedical Research Ethics Committee of the University of  
12 182 KwaZulu-Natal (BE048/11). Permission to conduct the study was also obtained from the KZN  
13 183 Provincial Department of Health and King Edward VIII hospital management.

#### 184 **Statistical analysis**

185 Data was captured in Excel and analysed in Stata Version 11. Frequencies and medians with  
186 ranges were presented for categorical and continuous variables respectively. The Chi-square and  
187 the Kruskal-Wallis test were used to test for significant associations between categorical and  
188 continuous variables and the dependent variables under study on bivariate analysis, respectively.

189 ~~Binary~~ Logistic regression was used to test for significant associations between independent and  
190 dependent variables on multivariate analysis. The dependent variables used in the regression  
191 analysis were: Latex sensitisation, which was defined as having a SPT wheal of  $\geq 3$ mm to latex  
192 extract; Latex allergy (LA) was defined as being SPT positive and a report of having any one or  
193 more of the listed work related clinical symptoms namely itchy eyes, red eyes, runny eyes, runny  
194 nose, itchy nose, sneezing, coughing, tight chest, wheezing, itchy skin, skin rash or dizziness.

195 Independent variables that were considered for analysis were as follows: Age (yrs.) and sex,  
196 duration of employment, job title, current department employed in, type of gloves used, number  
197 of pairs of gloves used per day, self reported and family history of atopy, food allergy and  
198 previous history of open surgery and number of surgical procedures. In the multivariate analysis,  
199 age was omitted due to collinearity with duration of employment. Departmental glove  
200 consumption was omitted as this only indicated annual distribution of gloves per department and

1  
2  
3  
4  
5  
6  
7  
8  
9 201 not necessarily employees' exposure since enrolled nursing assistants and enrolled nurses are  
10 202 rotated through different departments in any given year. The number of pair of gloves was used  
11 203 as an indicator of individual latex glove exposure. The variable number of pairs of gloves used  
12 204 and duration of employment were retained as continuous variables in the multivariate model.  
13  
14  
15  
16 205 Fractional polynomial and a fractional plot was used to visualise the dose-response relationship  
17 206 of these continuous exposure variables.  
18  
19

## 20 21 22 23 24 25 26 27 28 29 30 31 32 33 34 35 36 37 38 39 40 41 42 43 44 45 46 47 48 49 50 51 52 53 54 55 56 57 58 59 60

207 **RESULTS**

### 208 **Participant Demographics**

209 Sixty five HCWs refused to participate in the study. Among the 520 HCWs who responded to  
210 the invitation there was an overall participation rate of 85.5 % (n=501) with 3.6% (n=19)  
211 refusing SPT. There was no significant difference between those refusing SPT and those who  
212 had the SPT with respect to latex exposure status, age, sex and duration of employment.

213 The median age of participants was 42.2 years (range: 22 years-65 years) with the greater  
214 proportion of them being females. The median duration of employment was 10.9 years (range: 1  
215 year-42 years) with the majority of exposed participants having worked as a HCW for < 10  
216 years. Most unexposed healthcare workers had been employed for > 20 years. Personal and  
217 family history of allergy was more prevalent among unexposed HCWs while exposed HCWS  
218 reported a higher prevalence of a fruit allergy and history of previous surgery (Table 1).

### 219 **Prevalence of Latex Sensitisation and Allergy**

220 The overall prevalence of latex sensitisation and latex allergy were 5.9% (n=29) and 4.6%  
221 (n=23) respectively. Although the difference was not significant, the prevalence of latex

1  
2  
3  
4  
5  
6  
7  
8  
9 222 sensitisation was higher among the exposed group (7.1%) as compared to the unexposed group  
10 223 (3.1%). Latex allergy was significantly higher in the exposed group than unexposed group (5.9%  
11 224 vs 1.8%,  $p=0.04$ ). There was a significant difference in the work related allergy symptoms  
12 225 between exposed and unexposed workers (40.9% vs. 31.7%,  $p=0.04$ ) (Table 1). Symptoms that  
13 226 were significantly associated with latex sensitisation were skin rash ( $p< 0.000$ ), itchy skin  
14 227 ( $p=0.001$ ), runny nose ( $p=0.004$ ), red eyes ( $p=0.01$ ) and itchy eyes ( $p=0.01$ ).

15 228 The prevalence of latex sensitization was higher among those who were exposed and those with  
16 229 employment duration of  $< 10$  yrs. Although the prevalence of latex sensitisation was lower  
17 230 among participants  $< 30$  years of age, there was no significant variation with age or sex. There  
18 231 was a significant difference ( $p=0.04$ ) in the prevalence of fruit allergy between those participants  
19 232 with latex sensitisation (17.2%) and unsensitised participants (6.9%) The exclusive use of  
20 233 powder free latex gloves was found to be significantly ( $p=0.003$ ) higher among the participants  
21 234 who had latex sensitisation. There was equal distribution of powdered and powder free latex  
22 235 gloves among those who reported the use of mixed gloves. The prevalence of reporting previous  
23 236 open surgery and use of other non- occupational exposure latex containing material did not vary  
24 237 significantly between those who had latex sensitisation and those who were unsensitised. There  
25 238 was a significantly higher prevalence of reporting allergic reactions when handling other latex  
26 239 containing medical equipment among participants with latex allergy as compared to unsensitised  
27 240 participants (10.3% vs 1.7%,  $p=0.002$ ) (Table 2).

28  
29  
30  
31  
32  
33  
34  
35  
36  
37  
38  
39  
40  
41  
42  
43  
44  
45  
46 241 **Crude association of demographics, exposure status, medical and personal history and latex**  
47  
48 242 **sensitisation, latex allergy**  
49  
50  
51  
52  
53  
54  
55  
56  
57  
58  
59  
60

1  
2  
3  
4  
5  
6  
7  
8  
9 243 Latex exposure was significantly associated with latex allergy (OR: 3.4; 95% CI: 1.1-10.8).  
10 244 Working as a HCW for 5-9 years was significantly associated with latex sensitisation (OR: 2.6;  
11 245 95% CI: 1.2-5.5) and latex allergy (OR: 3.3; 95% CI: 1.4-7.6), respectively. Employment  
12 246 duration as a HCW for >20 years was protective against latex allergy (OR: 0.2; 95% CI: 0.0-0.8).  
13 247 In comparison with unexposed workers, working as an enrolled nurse was significantly  
14 248 associated with both latex sensitisation (OR: 2.5; 95% CI: 1.2-5.3) and latex allergy (OR: 2.4;  
15 249 95% CI: 1.1-5.6). The exclusive use of powder free latex gloves was significantly associated  
16 250 with latex sensitisation (OR: 3.1; 95% CI: 1.4-6.8) and latex allergy (OR: 3.1; 95% CI: 1.7-9.1).  
17 251 Powdered and powder free latex gloves were equally distributed among those who reported the  
18 252 use of mixed gloves. The annual consumption of pairs of gloves per HCW by department was  
19 253 ranked and grouped into tertiles. Although medical and surgical wards had low and moderate  
20 254 pairs of gloves consumption per HCW, these wards had the highest proportion of workers with  
21 255 latex sensitisation (n=6, 20.0% each). However the relation was only significant for those who  
22 256 reported the medical ward as being the current department in which they worked (p=0.01). The  
23 257 proportions for powdered latex glove use were 71% and 69% in medical and surgical wards,  
24 258 respectively and this was not statistically significant. Exposure to other latex containing medical  
25 259 devices was not significantly different from what was reported in other wards. There was no  
26 260 significant association between reported personal history of allergy disease, latex sensitisation  
27 261 and latex allergy. Fruit allergy was significantly associated with latex allergy (OR: 3.7; 95%:  
28 262 1.4-10.4) (Table 3). Listed fruits were evaluated for their independent association with latex  
29 263 sensitisation. Avocado (OR: 12.3; 95% CI: 5.1-29.6) and others (OR: 5.1; 95% CI: 2.1-11.8)  
30 264 which included pineapple and orange showed significant associations with latex sensitisation  
31 265 (data not shown).

## 266 **Multivariate analysis**

267 While latex exposure had estimates of the OR above 2, there was no significant association with  
268 latex sensitisation and latex allergy. Duration of employment was found to be inversely  
269 associated with latex allergy in models I and II. The exclusive use of powder free latex gloves  
270 was significantly associated with latex sensitisation (OR: 4.2; 95% CI: 1.2-14.1) and latex  
271 allergy (OR: 5.1; 95%CI: 1.2-21.2) on multivariate analysis. This significant association  
272 disappeared when examining the number of pairs of powder free gloves used in the last 7 days. A  
273 weak association was observed for the number of pairs of powdered latex gloves used in the last  
274 7 days with both latex sensitisation and latex allergy (model III and IV). Further analysis of  
275 duration of employment and number of pairs of gloves using fractional polynomial failed to  
276 demonstrate significant dose-response relationship with either latex sensitisation or latex allergy.  
277 Duration of employment showed significant ( p= 0.000) dose-response relationship when  
278 analysed using using penalised spline with degree of freedom =2 (Figure1). There was a  
279 significant association between fruit allergy and latex allergy in model I (OR: 3.1; 95% CI: 1.1-  
280 9.2) (Table 4).

## 281 **DISCUSSION**

282 This is an important study for South African HCWs as it examined the risk of latex sensitisation  
283 in a group of workers exposed to hypoallergenic latex gloves. As previously mentioned there has  
284 been no literature documenting the prevalence of latex sensitisation among South African HCWs  
285 using hypoallergenic lightly powered or powder-free latex gloves. The prevalence of latex  
286 sensitisation among exposed HCWs (7.1%) in this study is comparable to findings among HCWs  
287 in another South African hospital.<sup>14</sup> However it was considerably lower than the 11.9%  
288 prevalence reported by Potter in the same year.<sup>16</sup> While a substantial number of participants



1  
2  
3  
4  
5  
6  
7  
8  
9 289 (37%) reported work related allergy symptoms, only 4.6% met our definition of latex allergy.  
10  
11 290 The important symptoms associated with latex sensitisation were skin rash, itchy skin, runny  
12  
13 291 nose, red and itchy eyes in keeping with previous studies. Elimination of powdered latex gloves  
14  
15 292 has shown a reduction in the concentration of aeroallergens in the operating room with the low  
16  
17 293 prevalence of latex allergy in our study population.  
18  
19 294 Although the relationship was weak, this study showed that the risk of latex sensitisation  
20  
21 295 decreases with duration of employment. The healthy worker effect is a likely possible explanation  
22  
23 296 of this finding. Prior to availability of hypoallergenic latex gloves, workers who had developed  
24  
25 297 latex allergy may have left employment or they may have changed their career path and moved  
26  
27 298 into a more administrative or managerial role with no contact with latex gloves. Furthermore  
28  
29 299 new employees are only sensitised and have not yet manifested clinical symptoms and they  
30  
31 300 continue using latex gloves. On the other hand senior HCWs may have been sensitised during  
32  
33 301 their earlier years of employment and as a result they either moved to departments with less  
34  
35 302 exposure to latex gloves or deliberately avoid latex containing products and therefore exhibit less  
36  
37 303 latex related symptoms. Moreover, the introduction of hypoallergenic gloves 10 years prior to  
38  
39 304 the study may explain the reduced sensitisation in senior HCWs as demonstrated in the study by  
40  
41 305 Smith et al in 2007. The published literature has been inconsistent in reporting the association  
42  
43 306 between duration of employment and latex sensitisation. Although latex is one of the best studied  
44  
45 307 allergens, no exposure response studies have been published with measured latex allergen levels.  
46  
47 308 In addition, studies have demonstrated variation in allergen content of different gloves. These  
48  
49 309 may lead to discrepancies in the literature with regard to the role of duration of employment as a  
50  
51 310 surrogate measure of exposure.  
52  
53  
54  
55  
56  
57  
58  
59  
60

1  
2  
3  
4  
5  
6  
7  
8  
9 311 In our study HCWs who exclusively used powdered free latex gloves had a 4 times greater odds  
10 312 of developing latex sensitisation. The fact that HCWs with latex sensitisation or allergy work  
11 313 more often with powder free latex gloves is indicative of reverse causality because of symptoms.  
12 314 Moreover the background prevalence of latex sensitisation in this study was relatively higher  
13 315 (3.5%) than previously reported prevalence in the general population by Bousquet et al.<sup>13</sup> Studies  
14 316 have shown that some of these “hypoallergenic” latex gloves actually contain high levels of  
15 317 allergens which can be release into the environment with aggressive manipulation.<sup>23</sup> Some of the  
16 318 sensitised HCWs may have been sensitised before the hospital implemented a hypoallergenic  
17 319 latex glove policy. Also Smith et al showed that complete avoidance of powdered latex glove can  
18 320 result in the reduction or no change in measurable IgE antibodies.<sup>34</sup> A study in Germany reported  
19 321 a high prevalence of 8% among 226 dental students who had only been exposed to exclusive  
20 322 powder free latex gloves.<sup>30</sup> Similarly in the UK despite a total ban on powdered latex gloves  
21 323 Clayton found a 10% prevalence of latex sensitisation in HCWs.<sup>31</sup> It is also not clear to what  
22 324 extent the aeroallergens released by colleagues using powdered latex gloves influence this  
23 325 finding. Furthermore the role of other latex containing medical devices during sensitisation  
24 326 period cannot be entirely ruled out.

25  
26  
27  
28  
29  
30  
31  
32  
33  
34  
35  
36  
37  
38  
39  
40 327 In our study, frequency of exposure as measured by the number of gloves used in the last 7  
41 328 working days showed a weak association between powdered latex gloves and latex sensitisation  
42 329 but no association could be demonstrated with powder free latex gloves. Airborne latex  
43 330 aeroallergens have been shown to increase with the number of powdered gloves used which  
44 331 subsequently increases the risk of latex sensitisation and clinical latex glove related allergy  
45 332 symptoms.<sup>18</sup>

1  
2  
3  
4  
5  
6  
7  
8  
9 333 The positive association between department with low glove consumption per HCW and latex  
10 334 sensitisation is in contrast with previous finding by Liss and co-workers.<sup>9</sup> They reported positive  
11 335 association with departments that had high glove consumption per HCWs. Again, this could be  
12 336 as a result of reverse causality where HCWs with latex sensitisation may have been relocated to  
13 337 wards with low glove consumption to minimise the exposure. In addition, the annual pair of  
14 338 gloves consumption per HCW by department does not provide an accurate indication of  
15 339 individual exposure; rather it gives us the annual distribution of gloves to different departments.  
16  
17 340 Several studies have reported atopy as a significant risk factor for latex sensitisation.<sup>9, 10, 35</sup>  
18 341 Similarly, the prevalence of reporting a history of personal atopy in this study was higher among  
19 342 latex sensitised participants although the association was not statistically significant. The role of  
20 343 atopy is complex because some individuals might also have become atopic after having been  
21 344 latex sensitised and cross sectional study is not suitable in establishing this association.  
22  
23 345 Fruit latex allergy syndrome is a phenomenon seen where latex sensitised individuals  
24 346 demonstrate a cross reactivity with specific foods; particularly fruit. Studies have identified this  
25 347 phenomenon among sensitised HCWs and the general population. This has been attributed to the  
26 348 similarity between fruit proteins and latex allergens.<sup>36</sup> Fruit allergy was significantly associated  
27 349 with latex sensitisation and latex allergy in our study. Our study was dependent on the self-  
28 350 reporting of fruit allergy and no objective tests were carried out. It is therefore possible that  
29 351 participants have independent simultaneous allergies to both fruit and latex without cross  
30 352 reactivity. Also, we were unable to determine whether latex sensitisation preceded the  
31 353 development of fruit allergy or vice versa. Fruit allergy prior to latex exposure could have  
32 354 contributed to the association observed in our study.

1  
2  
3  
4  
5  
6  
7  
8  
9 355 Latex sensitised participants reported a high prevalence of a history of previous open surgery in  
10 356 our study. This has been reported to occur as a result of direct intraoperative exposure to latex  
11 357 containing medical devices such as catheters or tubes. Studies in children with congenital  
12 358 abnormalities have demonstrated that the risk for latex allergy increases with the number of open  
13 359 surgical procedures that they undergo.<sup>37</sup> Frequency of invasive procedures among adults was  
14 360 shown to increase the risk of latex sensitisation reporting while more than 10 procedures  
15 361 increased the risk of developing latex allergy.<sup>38</sup>

16  
17  
18  
19  
20 362 Strengths of this study include the high response rate (85.5%) and comparability to other  
21 363 studies.<sup>8, 16</sup> Access to the hospital employee database allowed us to better assess the  
22 364 representativeness of this study population by comparing demographic data of the non-  
23 365 participants and the participants. The participants were randomly selected minimising the  
24 366 potential of participant's bias that comes with a volunteer approach.

25  
26  
27  
28  
29  
30  
31  
32  
33 367 The presence of a control group provided a background prevalence of latex sensitisation in this  
34 368 population which allowed for a better estimation of associations attributable to work related  
35 369 factors. The use of Stallergenes latex specific SPT further strengthens the study. The SPT test is  
36 370 regarded as the gold standard for the diagnosis of latex allergy and Stallergenes has been shown  
37 371 to have a diagnostic sensitivity and specificity of 93% and 100%, respectively.<sup>32</sup> The research  
38 372 assistant employed on this study was trained and initially shadowed and periodically supervised  
39 373 by the principal investigator to ensure appropriate administration of the questionnaire and the  
40 374 SPT thereby improving the reliability and validity of the study.

41  
42  
43  
44  
45  
46  
47  
48  
49 375 This study was limited by the cross sectional study design which was relatively low in cost and  
50 376 quick to conduct. It only allowed for the determination of prevalence of latex sensitisation at one

1  
2  
3  
4  
5  
6  
7  
8  
9 377 point in time. Consequently the prevalence of latex sensitisation may have been underestimated  
10 378 as it is possible that HCWs who had already developed latex sensitisation have left the hospital  
11 379 before the study was conducted. Some of the observed associations in the study may be as a  
12 380 result of a complex interplay between the healthy worker effect, reverse causality and exposure  
13 381 reduction by the introduction of powder free latex gloves. These interactions can be better  
14 382 explored and understood in a longitudinal study. Recall bias is another potential limitation in this  
15 383 study as workers were asked to recall the number of gloves used in the past 7 working days.  
16 384 HCWs may have overestimated or underestimated their individual exposures. Our study  
17 385 depended on self-reporting of personal and family atopic disorders and this may have resulted in  
18 386 the misclassification of atopy. The role of atopy and cross-reactivity between allergens is a  
19 387 complex phenomenon which cannot be investigated in cross sectional study. Therefore, cohort  
20 388 studies are necessary to disentangle this phenomenon.

## 31 32 389 **CONCLUSION**

33  
34 390 This study shows that even in the presence of powder free hypoallergenic glove use there is latex  
35 391 sensitisation and latex allergy, adding to previous findings that HCWs exposed to hypoallergenic  
36 392 latex gloves are still at risk for developing latex sensitisation and latex allergy. This indicates that  
37 393 latex sensitisation and allergy are still an important occupational hazard for HCWs. While it may  
38 394 be economically impractical to replace the latex gloves in our setting, reduction of allergen  
39 395 content in latex products is another strategy that can be implemented to address the problem and  
40 396 protect HCWs. A policy accompanied by clear implementation plans as well as sustainable  
41 397 education and training programmes to address latex sensitisation and allergy among HCWs  
42 398 should be implemented.<sup>39</sup> In addition HCWs must be continuously monitored for the  
43 399 development of latex sensitisation and alternate latex free glove must be made available for

1  
2  
3  
4  
5  
6  
7  
8  
9 400 them. More research is needed to identify the most cost effective way of implementing a latex  
10 401 free environment in resource limited countries, such as South Africa. In addition the current  
11 402 studies in South Africa have largely been cross-sectional in nature. More cohort analysis is  
12 403 required to better understand the chronicity of illness and disability associated with latex allergy.

#### 17 404 **ACKNOWLEDGEMENT**

18  
19 405 I would like to thank the hospital employees participating in this study and their management for  
20 406 allowing me access to the human resource database. I would like to thank Professor Mohamed  
21 407 Jeebhay (Centre of Occupational and Environmental Health, University of Cape Town, SA) and  
22 408 Professor David L Nordstrom (Occupational and Environmental Safety and Health, University of  
23 409 Wisconsin-Whitewater, USA) for their comments on my initial proposal. I would like to thank  
24 410 Professor Rajen Naidoo (Discipline of Occupational and Environmental Health, UKZN, SA) for  
25 411 his statistical advice during the data analysis. In addition thank you to Mr. Nhlanhla Jwara for  
26 412 conducting the field work.

1  
2  
3  
4  
5  
6  
7  
8  
9 413 **Contributorship**

10  
11 414 Dr Shumani Phaswana is the principal investigator who was involved from the conception of the idea,  
12  
13 415 proposal writing, data collection, data management and interpretation of the results.  
14

15 416 Dr Saloshni Naidoo contributed to the conception and design of the study, analysis and interpretation of  
16  
17 417 the data, critical review of the intellectual content of the article and final approval of the article.  
18

19 418 **Data sharing**

20  
21  
22 419 No additional unpublished data  
23

24 420 **Funding**

25  
26  
27 421 None  
28

29  
30 422 **Competing interests**

31  
32  
33 423 None declared  
34  
35 424

## 425 REFERENCES

1. Nutter AF. Contact urticaria to rubber. *The Bri J Dermatol*. 1979; 101: 597-8.
2. Centers for Disease Control. Recommendations for prevention of HIV transmission in health-care settings. *MMWR Morb and Mort Wkly Rep*. 1987; 36 Suppl 2: 1S-18S.
3. Rego A, Roley L. In-use barrier integrity of gloves: latex and nitrile superior to vinyl. *Am J Infect Control*. 1999; 27: 405-10.
4. Leung R, Ho A, Chan J, et al. Prevalence of latex allergy in hospital staff in Hong Kong. *Clin Exp Allergy* 1997; 27: 167-74.
5. Chaiear N, Jindawong B, Boonsawas W, et al. Glove allergy and sensitization to natural rubber latex among nursing staff at Srinagarind Hospital, Khon Kaen, Thailand. *J Med Assoc Thailand*. 2006; 89: 368-76.
6. Wan KS, Lue HC. Latex allergy in health care workers in Taiwan: prevalence, clinical features. *Int Arch Occup Environ Health*. 2007; 80: 455-7.
7. Douglas R, Morton J, Czarny D, et al. Prevalence of IgE-mediated allergy to latex in hospital nursing staff. *Aust N Z J Med*. 1997; 27: 165-9.
8. Grzybowski M, Ownby DR, Peysen PA, et al. The prevalence of anti-latex IgE antibodies among registered nurses. *J Allergy Clin Immunol*. 1996; 98: 535-44.
9. Liss GM, Sussman GL, Deal K, et al. Latex allergy: epidemiological study of 1351 hospital workers. *Occup Environ Med*. 1997; 54: 335-42.
10. Watts DN, Jacobs RR, Forrester B, et al. An evaluation of the prevalence of latex sensitivity among atopic and non-atopic intensive care workers. *Am J Ind Med*. 1998; 34: 359-63.
11. Verna N, Di Giampaolo L, Renzetti A, et al. Prevalence and risk factors for latex-related diseases among healthcare workers in an Italian general hospital. *Ann Clin Lab Sci*. 2003; 33: 184-91.
12. Porri F, Lemiere C, Birnbaum J, et al. Prevalence of latex sensitization in subjects attending health screening: implications for a perioperative screening. *Clin Exp Allergy*. 1997; 27: 413-7.
13. Bousquet J, Flahault A, Vandenplas O, et al. Natural rubber latex allergy among health care workers: a systematic review of the evidence. *J Allergy Clin Immunol*. 2006; 118: 447-54.
14. Brathwaite N, Motala C, Toerien A, et al. Latex allergy--the Red Cross Children's Hospital experience. *S Afr med J*. 2001; 91: 750-1.
15. de Beers C, Cilliers J. Accurate diagnosis of latex allergy in hospital employees is cost-effective. *Curr Allergy Clin Immunol*. 2004; 91: 760-5.
16. Potter PC, Crombie I, Marian A, et al. Latex allergy at Groote Schuur Hospital--prevalence, clinical features and outcome. *S Afr Med J*. 2001; 91: 760-5.
17. Department of Labour. Compensation of Occupational and Diseases Act no 130. South Africa: Pretoria, 1993.
18. Allmers H, Brehler R, Chen Z, et al. Reduction of latex aeroallergens and latex-specific IgE antibodies in sensitized workers after removal of powdered natural rubber latex gloves in a hospital. *J Allergy Clin Immunol*. 1998; 102: 841-6.
19. Wrangsjo K, Boman A, Liden C, et al. Primary prevention of latex allergy in healthcare--spectrum of strategies including the European glove standardization. *Contact dermatitis*. 2012; 66: 165-71.
20. Malerich PG, Wilson ML, Mowad CM. The effect of a transition to powder-free latex gloves on workers' compensation claims for latex-related illness. *Dermatitis*. 2008; 19: 316-8.
21. Baur X, Chen Z, Allmers H. Can a threshold limit value for natural rubber latex airborne allergens be defined? *J Allergy Clin Immunol*. 1998; 101: 24-7.
22. Hayes BB, Afshari A, Millecchia L, et al. Evaluation of percutaneous penetration of natural rubber latex proteins. *Toxicol Sci* 2000; 56: 262-70.



- 1  
2  
3  
4  
5  
6  
7  
8  
9 471 23. Mabe DO, Singh TS, Bello B, et.al. Allergenicity of latex rubber products used in South African  
10 472 dental schools. *S Afri Med J* 2009; 99: 672-4.  
11 473 24. LaMontagne AD, Radi S, Elder DS, et.al. Primary prevention of latex related sensitisation and  
12 474 occupational asthma: a systematic review. *Occup Environ Med* 2006; 63: 359-64.  
13 475 25. Heederik D, Henneberger PK, Redlich CA. et.al.. Primary prevention: exposure reduction, skin  
14 476 exposure and respiratory protection. *Eur Respir Rev* 2012; 21: 112-24.  
15 477 26. Baur X, Sigsgaard T. The new guidelines for management of work-related asthma. *The Eur Respir*  
16 478 *J* 2012; 39: 518-9.  
17 479 27. Potter PC. Latex allergy--time to adopt a powder-free policy nationwide. *S Afri Med J* 2001; 91:  
18 480 746-8.  
19 481 28. Liss GM, Tarlo SM. Natural rubber latex-related occupational asthma: association with  
20 482 interventions and glove changes over time. *Am J Ind Med* 2001; 40: 347-53.  
21 483 29. Hunt LW, Kelkar P, Reed CE, et.al. Management of occupational allergy to natural rubber latex in  
22 484 a medical center: the importance of quantitative latex allergen measurement and objective follow-up. *J*  
23 485 *Allergy Clin Immunol* 2002; 110: S96-106.  
24 486 30. Schmid K, Christoph Broding H, Niklas D, et.al. Latex sensitization in dental students using  
25 487 powder-free gloves low in latex protein: a cross-sectional study. *Contact dermatitis* 2002; 47: 103-8.  
26 488 31. Clayton TH, Wilkinson SM. Contact dermatoses in healthcare workers: reduction in type I latex  
27 489 allergy in a UK centre. *Clin Exp Dermatol* 2005; 30: 221-5.  
28 490 32. Turjanmaa K, Palosuo T, Alenius H, et al. Latex allergy diagnosis: in vivo and in vitro  
29 491 standardization of a natural rubber latex extract. *Allergy* 1997; 52: 41-50.  
30 492 33. Morris A. ALLSA Position Statement: Allergen Skin-Prick Testing. *Curr Allergy Clin Immunol* 2006;  
31 493 90: 22-5.  
32 494 34. Smith AM, Amin HS, Biagini RE, et al. Percutaneous reactivity to natural rubber latex proteins  
33 495 persists in health-care workers following avoidance of natural rubber latex. *Clin Exp Allergy* 2007; 37:  
34 496 1349-56.  
35 497 35. Suli C, Parziale M, Lorini M, et.al. Prevalence and risk factors for latex allergy: a cross sectional  
36 498 study on health-care workers of an Italian hospital. *J Investig Allergol Clin Immunol* 2004; 14: 64-9.  
37 499 36. Blanco C. Latex-fruit syndrome. *Cur Allergy Asthma Rep* 2003; 3: 47-53.  
38 500 37. Porri F, Pradal M, Lemiere C, et al. Association between latex sensitization and repeated latex  
39 501 exposure in children. *Anesthesiology* 1997; 86: 599-602.  
40 502 38. Rueff F, Kienitz A, Schopf P, et al. Frequency of natural rubber latex allergy in adults is increased  
41 503 after multiple operative procedures. *Allergy* 2001; 56: 889-94.  
42 504 39. Brown RH, Hamilton RG, McAllister MA. How health care organizations can establish and  
43 505 conduct a program for a latex-safe environment. *Jt Comm J Qual Saf* 2003; 29: 113-23.

506

507

508 **TABLES**509 **Table 1: Demographics and associated risk factors amongst latex exposed and unexposed**  
510 **healthcare workers at King Edward VIII Hospital, KwaZulu-Natal South Africa, (n=501)**511  
512

| Characteristic                              | Exposed<br>N (%) | Unexposed<br>N (%) |
|---------------------------------------------|------------------|--------------------|
| Number of participants                      | 337 (67.3)       | 164 (32.7)         |
| <b>Demographics</b>                         |                  |                    |
| Age (years)                                 |                  |                    |
| ≤30                                         | 30(8.9)          | 19(11.6)           |
| >30-40                                      | 121(35.9)        | 40(24.4)           |
| >40-50                                      | 101(29.9)        | 59(35.9)           |
| >50                                         | 85(25.2)         | 46(28.1)           |
| Duration of employment (years)              |                  |                    |
| ≤5                                          | 39(11.6)         | 28(17.1)           |
| >5-10**                                     | 135(40.1)        | 32(19.5)           |
| >10-15                                      | 49(14.5)         | 17(10.4)           |
| >15-20                                      | 24(7.1)          | 20(12.2)           |
| >20*                                        | 90(26.7)         | 67(40.9)           |
| Sex **                                      |                  |                    |
| Female                                      | 309(91.7)        | 95(57.9)           |
| Male                                        | 28(8.3)          | 69(42.1)           |
| Job Title (yes)                             |                  |                    |
| Administrative                              |                  | 164(100.0)         |
| Professional nurses                         | 123(36.5)        |                    |
| Enrolled nurses                             | 141(41.8)        |                    |
| Enrolled nursing assistants                 | 73 (21.7)        |                    |
| <b>Medical and Personal History</b>         |                  |                    |
| Personal history of Allergy Disease (yes)   | 147(43.6)        | 83(50.6)           |
| Family history of Allergy Disease (yes)     | 197(58.5)        | 102(62.2)          |
| Fruit allergy (yes)                         | 29(8.6)          | 9(5.5)             |
| Previous open surgery (yes)*                | 168(49.8)        | 61(37.2)           |
| Work-related allergy symptoms(yes)*         | 138(40.9)        | 52(31.7)           |
| Non-occupational latex exposure (yes)       | 161(47.8)        | 76(46.3)           |
| Latex sensitisation (yes)                   | 24(7.1)          | 5(3.1)             |
| Current latex allergy (yes)*                | 20(5.9)          | 3(1.8)             |
| <b>Chi square, *p&lt;0.05, **p&lt;0.001</b> |                  |                    |

513  
514  
515  
516  
517

518 **Table 2: Comparison of risk factors between latex sensitised (skin prick test positive) and non-**  
 519 **sensitised (skin prick test negative) healthcare workers at King Edward VIII Hospital, KwaZulu-**  
 520 **Natal South Africa (n=501)**

521

| Characteristics                                | Latex SPT +ve <sup>†</sup> (29)<br>N (%) | Latex SPT -ve <sup>†</sup> (472)<br>N (%) | 522<br>523<br>524 |
|------------------------------------------------|------------------------------------------|-------------------------------------------|-------------------|
| <b>Demographics</b>                            |                                          |                                           | 525               |
| Age (years.)                                   |                                          |                                           | 526               |
| ≤30                                            | 1 (3.5)                                  | 48(10.2)                                  | 527               |
| >30-40                                         | 13 (44.8)                                | 148(31.4)                                 | 528               |
| >40-50                                         | 8 (27.6)                                 | 152(32.2)                                 | 529               |
| >50                                            | 7 (24.1)                                 | 124(26.3)                                 | 530               |
| Duration of employment                         |                                          |                                           | 531               |
| ≤5                                             | 3(10.3)                                  | 64(13.6)                                  | 532               |
| >5-10                                          | 16(55.2)                                 | 151(31.9)                                 | 533               |
| >10-15                                         | 3(10.3)                                  | 63(13.4)                                  | 534               |
| >15-20                                         | 1(3.5)                                   | 43(9.1)                                   | 535               |
| >20                                            | 6(20.7)                                  | 151(31.9)                                 | 536               |
| Sex (yes)                                      |                                          |                                           | 537               |
| Male                                           | 5(17.2)                                  | 118(25.0)                                 | 538               |
| Female                                         | 24(82.8)                                 | 354(75.0)                                 | 539               |
| Job Title (yes)                                |                                          |                                           | 540               |
| Administrative                                 | 5(17.2)                                  | 159(33.7)                                 | 541               |
| Professional nurses                            | 5(17.2)                                  | 118(25.0)                                 | 542               |
| Enrolled nurses                                | 14(48.3)                                 | 127(26.9)                                 | 543               |
| Enrolled nursing assistants                    | 5(17.2)                                  | 68(14.4)                                  | 544               |
| <b>Latex Exposure</b>                          |                                          |                                           | 545               |
| Exposure status(yes)                           | 24 (82.8)                                | 313(66.3)                                 | 546               |
| Type of gloves                                 |                                          |                                           | 547               |
| None                                           | 5(17.2)                                  | 165(34.6)                                 | 548               |
| Exclusive powdered latex glove (yes)           | 2(6.9)                                   | 36(7.6)                                   | 549               |
| Exclusive powder free latex glove (yes)*       | 11(37.9)                                 | 77(16.3)                                  | 550               |
| Mixed (yes)                                    | 11(37.9)                                 | 198(41.9)                                 | 551               |
| <b>Medical and Personal History</b>            |                                          |                                           | 552               |
| Personal history of Allergy Disease (yes)      | 16(55.2)                                 | 214(45.3)                                 | 553               |
| Family history of Allergy Disease (yes)        | 18(62.1)                                 | 281(59.5)                                 | 554               |
| Fruit allergy (yes)*                           | 5(17.2)                                  | 33(6.9)                                   | 555               |
| Previous open surgery (yes)                    | 18(62.1)                                 | 211(44.7)                                 | 556               |
| Non-occupational latex exposure (yes)          | 12(41.4)                                 | 225(47.7)                                 | 557               |
| Reaction to other latex medical devices (yes)* | 3(10.3)                                  | 8(1.7)                                    | 558               |
| <b>Chi Square, *p&lt;0.05</b>                  |                                          |                                           | 559               |
| <b>†Latex Skin Prick Test Positive</b>         |                                          |                                           | 560               |
| <b>#Latex Skin Prick Test Negative</b>         |                                          |                                           | 561               |
|                                                |                                          |                                           | 562               |

563

564

565

566

567 **Table 3: Crude Odds Ratios (OR) (95%CI) of demographics, exposure status, medical and personal**  
 568 **history and latex sensitisation and latex allergy amongst healthcare workers at King Edward VIII**  
 569 **Hospital, KwaZulu-Natal South Africa, (n=501)**

| Characteristics                                                                      | N=2<br>9 | Latex Sensitisation<br>OR (95%CI) | N=23 | LA#<br>OR (95%CI) | 570<br>571<br>572 |
|--------------------------------------------------------------------------------------|----------|-----------------------------------|------|-------------------|-------------------|
| <b>Demographics</b>                                                                  |          |                                   |      |                   |                   |
| Age (years)                                                                          |          |                                   |      |                   | 573               |
| ≤30                                                                                  | 1        | 0.3(0.0-1.9)                      | 1    | 0.4(0.0-2.4)      | 574               |
| >30-40                                                                               | 13       | 1.8(0.8-3.7)                      | 11   | 2.0(0.9-4.6)      | 575               |
| >40-50                                                                               | 8        | 0.8(0.4-1.8)                      | 7    | 0.9(0.4-2.2)      |                   |
| >50                                                                                  | 7        | 0.8(0.4-2.1)                      | 4    | 0.6(0.2-1.7)      |                   |
| Duration of employment (years)                                                       |          |                                   |      |                   | 576               |
| <5                                                                                   | 3        | 0.7(0.2-2.4)                      | 3    | 0.9(0.3-3.2)      | 577               |
| 5-10                                                                                 | 16       | 2.6(1.2-5.5)*                     | 14   | 3.3(1.4-7.6)*     | 578               |
| >10-15                                                                               | 3        | 0.7(0.2-2.4)                      | 3    | 0.9(0.3-3.2)      |                   |
| >15-20                                                                               | 1        | 0.4(0.0-2.1)                      | 1    | 0.5(0.0-2.8)      |                   |
| >20                                                                                  | 6        | 0.5(0.2-1.4)                      | 2    | 0.2(0.0-0.8)      |                   |
| Sex (yes)                                                                            |          |                                   |      |                   | 579               |
| Female                                                                               | 24       | 1.6(0.6-4.1)                      | 20   | 2.2(0.7-7.2)      | 580               |
| Job Title (yes)                                                                      |          |                                   |      |                   | 581               |
| Administrative                                                                       | 5        | 0.4(0.2-1.1)                      | 3    | 0.3(0.1-0.9)*     | 582               |
| Professional nurses                                                                  | 5        | 0.6(0.2-1.6)                      | 4    | 0.6(0.2-1.8)      |                   |
| Enrolled nurses                                                                      | 14       | 2.5(1.2-5.3)*                     | 11   | 2.4(1.1-5.6)*     |                   |
| Enrolled nursing assistants                                                          | 5        | 1.2(0.5-3.3)                      | 5    | 1.7(0.6-4.5)      |                   |
| <b>Latex Exposure</b>                                                                |          |                                   |      |                   |                   |
| Exposure status (yes)                                                                | 24       | 2.4(0.9-6.3)                      | 20   | 3.4(1.1-10.8)     | 583               |
| Type of gloves                                                                       |          |                                   |      |                   | 584               |
| None                                                                                 | 5        | 0.4(0.2-1.0)                      | 3    | 0.3(0.1-0.9)      | 585               |
| Exclusive Powdered latex glove (yes)                                                 | 2        | 0.9(0.0-3.6)                      | 2    | 1.2(0.0-1.7)      | 586               |
| Exclusive Powder free latex glove (yes)                                              | 11       | 3.1(1.4-6.8)*                     | 10   | 3.1(1.7-9.1)*     |                   |
| Mixed gloves(yes)                                                                    | 11       | 0.8(0.4-1.8)                      | 8    | 0.7(0.3-1.7)      |                   |
| <b>Medical and Personal History</b>                                                  |          |                                   |      |                   |                   |
| Personal history of Allergy Disease (yes)                                            | 16       | 1.4(0.7-3.1)                      | 12   | 1.3(0.5-2.9)      | 587               |
| Family history of Allergy Disease (yes)                                              | 18       | 1.1(0.5-2.4)                      | 14   | 1.1(0.5-2.4)      | 588               |
| Fruit allergy (yes)                                                                  | 5        | 2.8(1.0-7.5)                      | 5    | 3.7(1.4-10.4)*    | 589               |
| Previous open surgery (yes)                                                          | 18       | 1.1(0.5-2.4)                      | 14   | 1.5(0.7-3.1)      |                   |
| <b>Chi square, *p&lt;0.05</b>                                                        |          |                                   |      |                   | 590               |
| <b>† Latex Skin Prick Test Positive</b>                                              |          |                                   |      |                   | 591               |
| <b>#Latex Skin Prick Test Positive and work related clinical symptoms of allergy</b> |          |                                   |      |                   | 592               |

593

594

595

**Table 4: Multivariate analysis of demographics, medical and personal history, exposure history and latex sensitisation (LS)<sup>†</sup> and latex allergy (LA)<sup>#</sup> amongst healthcare workers at King Edward III Hospital, KwaZulu-Natal South Africa, (n=501)**

| Characteristics                              | MODEL I* (n=501) |               | MODEL II** (n=501) |               | MODEL III***(n=202) |               | MODEL IV****(n=252) |               |
|----------------------------------------------|------------------|---------------|--------------------|---------------|---------------------|---------------|---------------------|---------------|
|                                              | LS OR (95%CI)    | LA OR (95%CI) | LS OR (95%CI)      | LA OR (95%CI) | LS OR (95%CI)       | LA OR (95%CI) | LS OR (95%CI)       | LA OR (95%CI) |
| <b>Demographics</b>                          |                  |               |                    |               |                     |               |                     |               |
| Sex (female)                                 | 0.9(0.2-2.7)     | 1.1(0.3-4.4)  | 0.9(0.3-2.7)       | 1.1(0.3-4.5)  | 0.3(0.0-1.8)        | 0.3(0.0-3.1)  | 2.5(0.5-12.2)       | 2.5(0.5-12.2) |
| Duration of employment (years)               | 0.9(0.9-1.0)     | 0.9(0.8-0.9)  | 0.9(0.9-1.0)       | 0.9(0.8-0.9)  | 0.9(0.9-1.8)        | 0.7(0.5-1.0)  | 0.9(0.9-1.0)        | 0.9(0.9-1.0)  |
| <b>Latex Exposure</b>                        |                  |               |                    |               |                     |               |                     |               |
| Exposure status(yes)                         | 2.2(0.7-6.7)     | 2.6(0.7-9.8)  |                    |               |                     |               |                     |               |
| Type of gloves                               |                  |               |                    |               |                     |               |                     |               |
| None                                         |                  |               | 1                  | 1             |                     |               |                     |               |
| Exclusive lightly powdered latex glove (yes) |                  |               | 1.6(0.3-9.8)       | 2.6(0.4-17.7) |                     |               |                     |               |
| Exclusive Powder free latex glove (yes)      |                  |               | 4.2(1.2-14.1)      | 5.1(1.2-21.2) |                     |               |                     |               |
| Mixed gloves (yes)                           |                  |               | 1.7(0.5-5.6)       | 1.7(0.4-7.1)  |                     |               |                     |               |

1  
2  
3  
4  
5  
6  
7  
8  
9  
10  
11  
12  
13  
14  
15  
16  
17  
18  
19  
20  
21  
22  
23  
24  
25  
26  
27  
28  
29  
30  
31  
32  
33  
34  
35  
36  
37  
38  
39  
40  
41  
42  
43  
44  
45  
46  
47  
48  
49

|                                                      |               |              |              |              |               |                |              |               |
|------------------------------------------------------|---------------|--------------|--------------|--------------|---------------|----------------|--------------|---------------|
| Pairs of Powdered latex Gloves in the last 7 days    |               |              |              |              | 1.1(1.0-1.2)  | 1.2(1.0-1.4)   |              |               |
| Pairs of Powder Free Latex Gloves in the last 7 days |               |              |              |              |               |                | 1.0(0.9-1.1) | 1.0(0.9-1.1)  |
| <b>Personal and Medical History</b>                  |               |              |              |              |               |                |              |               |
| Personal history of allergy disease (yes)            | 1.5(0.7-3.3)  | 1.4(0.6-3.2) | 1.5(0.7-3.3) | 1.3(0.6-3.2) | 1.4(0.3-6.8)  | 1.6(0.2-11.6)  | 1.0(0.4-2.9) | 0.9(0.3-2.8)  |
| Family history of allergy disease (yes)              | 1.0(0.45-2.2) | 0.9(0.4-2.2) | 1.1(0.5-2.3) | 0.9(0.4-2.3) | 0.4(0.1-1.9)  | 0.5(0.1-3.6)   | 0.7(0.2-2.0) | 0.8(0.3-2.7)  |
| Fruit allergy (yes)                                  | 2.3(0.8-6.7)  | 3.1(1.1-9.2) | 2.2(0.8-6.5) | 3.0(0.9-9.1) | 5.0(0.4-56.9) | 9.7(0.6-163.0) | 1.7(0.3-8.5) | 2.0(0.4-10.4) |
| Previous open surgery (yes)                          | 2.0(0.9-4.4)  | 1.9(0.8-4.6) | 2.1(0.9-4.6) | 1.9(0.8-4.7) | 1.4(0.3-7.4)  | 1.2(0.1-11.1)  | 1.1(0.4-3.2) | 1.2(0.4-3.8)  |

†Latex Skin Prick Test Positive  
 ‡Latex Skin Prick Test Positive and work related clinical symptoms of allergy  
 \*Model included latex glove exposure status  
 \*\*Model included type of gloves  
 \*\*\*Model included number of pairs of powdered latex gloves  
 \*\*\*\*Model included number of pairs of powder free latex gloves

Only

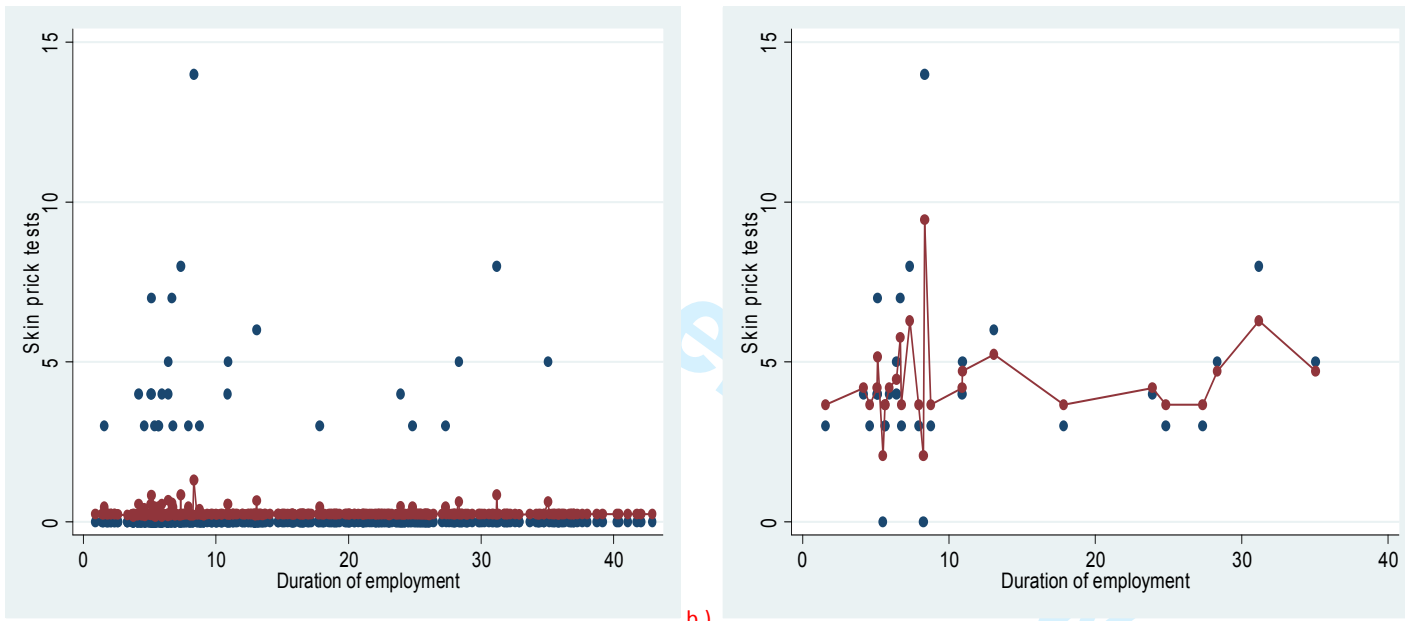

a.)  
b.)  
**Figure 1: Exposure-response relationship between duration of employment and latex sensitisation using penalised splines including a.) All participants and b) Spt positive only**

30

1  
2  
3  
4  
5  
6  
7  
8  
9  
10  
11  
12  
13  
14  
15  
16  
17  
18  
19  
20  
21  
22  
23  
24  
25  
26  
27  
28  
29  
30  
31  
32  
33  
34  
35  
36  
37  
38  
39  
40  
41  
42  
43  
44  
45  
46  
47  
48  
49  
50  
51  
52  
53  
54  
55  
56  
57  
58  
59  
60STROBE Statement—Checklist of items that should be included in reports of *cross-sectional studies*

|                              | Item No | Recommendation                                                                                                                                                                                                                                                                                                                                                                                                |
|------------------------------|---------|---------------------------------------------------------------------------------------------------------------------------------------------------------------------------------------------------------------------------------------------------------------------------------------------------------------------------------------------------------------------------------------------------------------|
| <b>Title and abstract</b>    | 1       | (a) Indicate the study's design with a commonly used term in the title or the abstract<br>(b) Provide in the abstract an informative and balanced summary of what was done and what was found                                                                                                                                                                                                                 |
| <b>Introduction</b>          |         |                                                                                                                                                                                                                                                                                                                                                                                                               |
| Background/rationale         | 2       | Explain the scientific background and rationale for the investigation being reported                                                                                                                                                                                                                                                                                                                          |
| Objectives                   | 3       | State specific objectives, including any prespecified hypotheses                                                                                                                                                                                                                                                                                                                                              |
| <b>Methods</b>               |         |                                                                                                                                                                                                                                                                                                                                                                                                               |
| Study design                 | 4       | Present key elements of study design early in the paper                                                                                                                                                                                                                                                                                                                                                       |
| Setting                      | 5       | Describe the setting, locations, and relevant dates, including periods of recruitment, exposure, follow-up, and data collection                                                                                                                                                                                                                                                                               |
| Participants                 | 6       | (a) Give the eligibility criteria, and the sources and methods of selection of participants                                                                                                                                                                                                                                                                                                                   |
| Variables                    | 7       | Clearly define all outcomes, exposures, predictors, potential confounders, and effect modifiers. Give diagnostic criteria, if applicable                                                                                                                                                                                                                                                                      |
| Data sources/<br>measurement | 8*      | For each variable of interest, give sources of data and details of methods of assessment (measurement). Describe comparability of assessment methods if there is more than one group                                                                                                                                                                                                                          |
| Bias                         | 9       | Describe any efforts to address potential sources of bias                                                                                                                                                                                                                                                                                                                                                     |
| Study size                   | 10      | Explain how the study size was arrived at                                                                                                                                                                                                                                                                                                                                                                     |
| Quantitative variables       | 11      | Explain how quantitative variables were handled in the analyses. If applicable, describe which groupings were chosen and why                                                                                                                                                                                                                                                                                  |
| Statistical methods          | 12      | (a) Describe all statistical methods, including those used to control for confounding<br>(b) Describe any methods used to examine subgroups and interactions<br>(c) Explain how missing data were addressed<br>(d) If applicable, describe analytical methods taking account of sampling strategy<br>(e) Describe any sensitivity analyses                                                                    |
| <b>Results</b>               |         |                                                                                                                                                                                                                                                                                                                                                                                                               |
| Participants                 | 13*     | (a) Report numbers of individuals at each stage of study—eg numbers potentially eligible, examined for eligibility, confirmed eligible, included in the study, completing follow-up, and analysed<br>(b) Give reasons for non-participation at each stage<br>(c) Consider use of a flow diagram                                                                                                               |
| Descriptive data             | 14*     | (a) Give characteristics of study participants (eg demographic, clinical, social) and information on exposures and potential confounders<br>(b) Indicate number of participants with missing data for each variable of interest                                                                                                                                                                               |
| Outcome data                 | 15*     | Report numbers of outcome events or summary measures                                                                                                                                                                                                                                                                                                                                                          |
| Main results                 | 16      | (a) Give unadjusted estimates and, if applicable, confounder-adjusted estimates and their precision (eg, 95% confidence interval). Make clear which confounders were adjusted for and why they were included<br>(b) Report category boundaries when continuous variables were categorized<br>(c) If relevant, consider translating estimates of relative risk into absolute risk for a meaningful time period |
| Other analyses               | 17      | Report other analyses done—eg analyses of subgroups and interactions, and sensitivity analyses                                                                                                                                                                                                                                                                                                                |



| <b>Discussion</b>        |    |                                                                                                                                                                            |
|--------------------------|----|----------------------------------------------------------------------------------------------------------------------------------------------------------------------------|
| Key results              | 18 | Summarise key results with reference to study objectives                                                                                                                   |
| Limitations              | 19 | Discuss limitations of the study, taking into account sources of potential bias or imprecision. Discuss both direction and magnitude of any potential bias                 |
| Interpretation           | 20 | Give a cautious overall interpretation of results considering objectives, limitations, multiplicity of analyses, results from similar studies, and other relevant evidence |
| Generalisability         | 21 | Discuss the generalisability (external validity) of the study results                                                                                                      |
| <b>Other information</b> |    |                                                                                                                                                                            |
| Funding                  | 22 | Give the source of funding and the role of the funders for the present study and, if applicable, for the original study on which the present article is based              |

\*Give information separately for exposed and unexposed groups.

**Note:** An Explanation and Elaboration article discusses each checklist item and gives methodological background and published examples of transparent reporting. The STROBE checklist is best used in conjunction with this article (freely available on the Web sites of PLoS Medicine at <http://www.plosmedicine.org/>, Annals of Internal Medicine at <http://www.annals.org/>, and Epidemiology at <http://www.epidem.com/>). Information on the STROBE Initiative is available at [www.strobe-statement.org](http://www.strobe-statement.org).

1  
2  
3  
4  
5  
6  
7  
8  
9  
10  
11  
12  
13  
14  
15  
16  
17  
18  
19  
20  
21  
22  
23  
24  
25  
26  
27  
28  
29  
30  
31  
32  
33  
34  
35  
36  
37  
38  
39  
40  
41  
42  
43  
44  
45  
46  
47  
48  
49  
50  
51  
52  
53  
54  
55  
56  
57  
58  
59  
60

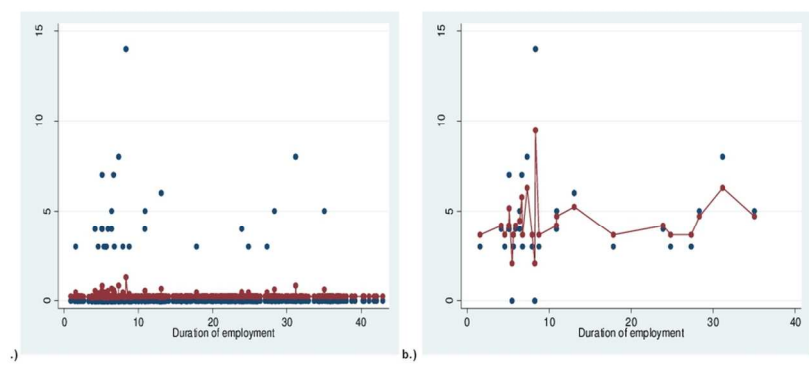

Figure 1: Exposure-response relationship between duration of employment and latex sensitisation using penalised splines including a.) All participants and b) Spt positive only

.....  
.....

127x90mm (300 x 300 DPI)

view only
